# Supplementary material for: Workplace violence against medical staff of Chinese children's hospitals: A cross-sectional study
Source: PLoS One. 2017 Jun 13;12(6):e0179373. doi: 10.1371/journal.pone.0179373 (PMC5469493; doi:10.1371/journal.pone.0179373)
Supplement: S1 Dataset — The supporting dataset includes the data underlyingour findingsin this study.(XLS) (XLS) [file pone.0179373.s001.xls]

## Sheet: 提交版 数据库
Gender	Age	Level of education	Marital status	Professional title	Employment form	Monthly income(RMB)	Profession	Department	Years in the profession(years)	Treatment Time(hours)	The contact time with the patient(hours)	Verbal	Threats	Sexual	Physical aggression, no injury	Slight injury	Moderate injury	Severe injury	Location of the incident	Time of occurrence	When the event occurs	Patient	Family members	Visitors	Other	Male	Female	≤20years	21-30years	31-40years	41-50years	51-60years	＞60years	Reson1	Reson2	Reson3	Reson4	Reson5	Reson6	Reson7	Reson8	Reson9	Reson10	Reson11	Reson12	Reson13	coping style1	coping style2	coping style3
1	3	3	1	3	1	2	1	2	3	5	4	1	0	0	0	0	0	0	2	2	2	0	1	0	0		1	0	0	0	0	1	0	0	0	0	0	0	0	0	1	0	0	0	0	0	1	0	0
1	2	3	1	2	1	2	1	1	2	5	3	1	0	0	0	0	0	0	1	2	2	0	1	0	0	1	0	0	1	0	0	0	0	0	0	0	0	0	0	0	0	0	1	0	0	0	0	1	0
2	3	2	1	2	1	2	2	10	5	4	4	3	2	0	1	0	0	0	1	1	1	0	1	0	0	1	0	0	1	1	1	1	0	0	0	0	0	1	1	1	0	0	1	1	1	0	1	1	0
2	1	2	1	1	2	2	2	10	3	4	4	3	2	0	2	0	0	0	1	1	1	0	1	0	0	1	0	0	0	1	1	1	0	0	0	0	0	1	1	1	1	0	1	1	1	0	1	1	0
1	1	1	4	1	2	1	3	9	1	5	4	2	0	0	0	0	0	0	1	1	1	0	1	0	0	1	0	0	0	1	0	0	0	0	0	0	0	1	1	1	0	0	0	0	0	0	1	1	0
1	1	1	4	1	2	1	3	10	1	4	4	3	3	0	0	0	0	0	1	1	2	0	1	0	0	1	1	0	0	0	1	0	0	0	0	0	0	1	1	0	0	1	1	0	0	0	1	0	0
2	2	2	1	2	1	2	1	10	4	5	2	1	0	0	0	0	0	0	1	1	2	0	1	0	0	1	1	0	0	1	0	0	0	0	0	0	0	0	1	1	0	0	1	1	0	0	1	1	0
2	1	2	1	2	1	2	3	10	3	5	1	1	0	0	0	0	0	0	1	1	1	0	1	0	0	0	1	0	0	0	0	1	0	0	0	0	0	0	0	0	0	0	1	0	0	0	0	1	0
1	1	3	4	1	1	2	1	10	2	5	4	3	0	0	0	0	0	0	1	2	1	0	1	0	0	1	0	0	1	0	0	0	0	0	0	0	0	0	0	0	0	1	1	1	1	0	1	1	0
1	2	2	4	1	1	2	3	10	3	5	4	2	1	0	0	0	0	0	1	1	2	0	1	0	0	0	1	0	1	0	0	0	0	0	0	0	1	1	1	1	0	1	1	0	0	0	0	1	0
1	1	3	1	1	1	2	3	10	2	5	3	3	3	0	1	1	0	0	1	1	1	1	1	1	1	1	1	0	1	1	1	1	1	0	0	0	0	0	1	1	0	0	1	1	1	0	1	1	0
1	1	2	1	3	1	1	3	6	3	3	2	2	0	0	0	0	0	0	1	1	1	0	1	0	0	1	1	0	0	1	1	1	0	0	0	0	0	0	0	1	0	0	0	0	0	0	1	0	0
2	1	1	4	1	2	2	2	1	3	5	4	3	0	0	1	0	0	0	1	1	2	0	1	0	0	1	1	0	0	1	1	1	0	0	0	0	1	1	1	0	1	1	1	1	1	0	1	1	0
2	1	2	1	1	2	2	2	1	2	5	4	3	1	0	2	2	2	1	5	1	2	0	1	0	0	1	1	0	1	0	0	0	0	0	0	0	0	1	1	1	0	0	1	0	0	0	0	1	0
2	1	2	1	1	1	2	2	1	3	5	4	3	2	0	0	1	0	0	2	1	2	0	1	0	0	1	0	0	0	1	1	0	0	0	0	0	0	1	1	0	0	0	1	1	0	0	0	1	0
2	2	2	1	2	1	1	2	1	4	3	3	2	2	0	1	2	1	0	4	2	2	0	1	0	0	1	0	0	0	1	0	0	0	1	0	0	1	1	1	0	0	0	0	0	0	0	1	1	0
2	1	2	1	1	2	1	2	1	2	5	4	2	2	0	1	1	0	0	1	1	2	1	1	1	0	0	1	0	1	0	0	0	0	1	0	0	0	1	1	1	0	1	0	0	0	0	1	1	0
2	2	1	1	1	2	1	2	1	4	5	4	3	3	0	1	0	1	0	2	1	1	0	1	0	0	1	0	0	0	1	0	0	0	0	0	0	0	1	0	0	0	0	0	0	0	0	0	0	0
2	2	2	1	1	2	2	2	1	3	5	2	3	1	0	0	0	0	0	5	1	2	0	1	0	0	1	1	0	0	1	0	1	0	0	0	0	0	0	1	0	0	0	1	1	0	0	1	0	0
2	2	2	1	1	1	3	1	1	3	5	4	2	2	0	1	1	0	0	3	1	2	0	1	0	0	1	0	0	1	0	0	0	0	0	0	0	0	0	0	0	1	0	0	0	0	0	1	0	0
2	2	2	1	2	2	1	2	1	3	4	4	2	1	0	0	0	0	0	1	1	1	0	1	0	0	1	1	0	1	0	0	0	0	0	0	0	0	1	0	0	0	0	0	0	0	0	0	1	0
2	2	2	1	2	1	2	2	1	4	3	2	3	1	0	1	1	0	0	1	1	2	0	1	0	0	1	1	0	1	1	0	0	0	0	0	0	1	0	1	1	0	0	0	0	0	0	1	1	0
2	1	1	1	1	2	1	2	1	2	4	4	2	0	0	0	0	0	0	1	2	2	0	1	0	0	0	1	0	1	0	0	0	0	0	0	0	0	0	0	1	0	0	0	0	0	0	0	1	0
2	1	2	1	1	2	2	2	1	2	4	4	3	3	0	0	0	0	0	2	2	2	0	1	0	0	1	1	0	1	1	1	0	0	0	0	0	0	1	1	0	1	1	1	1	1	0	1	1	0
2	2	2	1	1	1	1	2	1	4	4	4	3	3	0	0	0	0	0	1	1	2	1	0	0	0	0	1	0	1	0	0	0	0	0	0	0	0	1	1	0	0	0	0	0	0	0	1	0	0
2	2	2	1	2	2	2	2	1	4	5	4	3	3	0	0	0	0	0	1	1	2	0	1	0	0	1	1	0	0	1	1	1	0	0	0	0	0	0	1	1	0	0	1	1	0	0	0	1	0
1	1	2	1	1	1	1	3	10	3	4	3	3	2	0	0	0	0	0	1	1	2	0	1	0	0	1	0	0	0	1	1	1	0	0	0	0	0	0	0	1	0	0	0	0	0	0	1	0	0
2	1	2	4	1	2	2	2	3	2	5	4	3	0	0	0	0	0	0	2	1	2	0	1	0	0	1	1	0	1	1	0	1	0	0	0	0	0	1	1	1	1	0	1	1	1	0	1	1	0
2	2	2	1	1	2	2	2	2	3	5	4	3	0	0	0	0	0	0	2	1	2	0	1	0	0	1	1	0	0	1	0	1	0	0	0	0	0	1	0	1	0	0	1	1	0	0	1	0	0
2	2	2	1	2	2	1	2	6	3	5	4	3	0	0	0	0	0	0	5	3	1	0	1	0	0	1	1	0	0	1	0	0	0	0	0	0	0	0	0	0	0	1	1	0	0	0	1	0	0
2	2	2	1	1	2	2	2	3	3	5	4	3	0	0	0	0	0	0	2	1	2	0	1	1	0	1	1	0	0	1	0	1	0	0	0	0	0	1	1	1	1	0	1	1	1	0	1	0	0
1	2	2	1	2	1	3	1	3	4	5	2	0	1	0	0	0	0	0	2	2	2	0	0	1	0	1	1	0	0	0	0	1	0	0	0	0	0	1	0	1	1	1	1	1	1	0	1	1	0
2	1	2	1	1	2	2	2	3	3	5	4	3	0	0	0	0	0	0	2	1	2	0	1	1	0	1	1	0	1	1	0	0	0	0	0	0	0	1	0	0	1	0	0	1	0	0	0	0	0
2	2	2	1	1	2	2	2	3	3	5	4	3	0	0	0	0	0	0	2	1	1	0	1	1	0	1	1	0	1	1	1	1	1	0	0	0	0	1	1	1	1	0	0	0	0	0	1	1	0
2	1	2	4	1	2	1	2	3	2	4	4	1	0	0	0	0	0	0	2	1	1	0	1	0	0	0	1	0	1	0	0	0	0	0	0	0	0	1	0	0	0	1	0	1	1	0	1	1	0
2	2	2	1	2	1	2	2	3	4	5	4	3	0	0	0	0	0	0	2	1	2	0	1	1	0	1	1	0	1	1	0	0	0	0	0	0	0	1	0	0	1	0	0	1	0	0	0	0	0
2	2	2	1	1	2	2	2	3	3	5	4	3	0	0	0	0	0	0	2	1	2	0	1	0	0	1	1	0	0	1	0	1	0	0	0	0	0	1	0	0	1	0	0	1	0	0	0	0	0
2	3	1	1	3	1	2	2	3	5	5	4	3	0	0	0	0	0	0	2	1	2	0	1	1	0	1	1	0	1	0	0	0	0	0	0	0	0	1	0	0	1	0	1	1	0	0	1	1	0
1	6	3	1	3	1	3	1	3	5	5	2	1	0	0	0	0	0	0	3	1	2	0	1	0	0	1	0	0	1	0	0	0	0	0	0	0	0	0	0	0	1	0	0	0	0	0	0	0	0
2	1	3	4	1	1	2	1	3	2	5	4	3	3	0	0	0	0	0	2	2	2	0	1	0	0	1	0	0	0	0	0	1	0	0	0	0	0	1	1	1	1	0	1	1	1	0	1	0	0
1	2	3	1	2	1	3	1	3	3	5	3	2	2	0	1	0	0	0	3	1	2	0	1	1	0	1	0	0	0	1	1	0	0	0	1	0	0	1	0	0	1	0	0	0	1	0	1	0	0
1	2	2	1	2	1	2	1	3	4	5	4	2	0	0	0	0	0	0	2	1	2	0	1	1	0	0	1	0	0	1	1	1	0	0	0	0	0	1	0	1	0	1	0	1	0	0	0	1	0
2	1	1	4	2	2	1	2	2	2	5	4	1	1	0	0	0	0	0	2	1	2	0	1	0	0	0	1	0	1	1	0	0	0	0	0	0	0	0	1	0	1	0	1	1	0	0	1	1	0
2	1	3	1	2	1	2	1	2	2	5	4	2	1	0	0	0	0	0	2	1	1	0	1	0	0	1	1	0	1	1	0	0	0	0	0	0	0	0	0	1	1	1	0	1	0	0	1	0	0
2	2	2	1	3	1	2	2	4	5	5	4	3	3	0	2	0	0	0	4	1	2	0	1	0	0	1	1	0	1	1	0	1	0	0	0	0	0	0	0	0	1	0	0	0	0	0	1	0	0
2	1	3	1	1	1	2	1	2	2	5	4	3	1	0	1	0	0	0	2	2	1	1	1	1	0	1	1	1	1	1	1	1	1	1	1	1	1	1	1	1	1	1	1	1	1	1	1	1	1
1	3	2	1	3	1	3	1	4	4	5	4	3	3	0	0	0	0	0	1	1	1	0	1	1	0	1	1	0	1	1	0	0	0	1	0	0	0	1	1	1	1	0	0	1	1	0	1	0	0
2	2	2	1	1	2	2	2	2	4	5	4	3	0	0	1	1	0	0	2	1	2	0	1	0	0	0	1	0	1	0	0	0	0	0	0	0	0	0	1	0	0	1	0	0	0	0	0	0	0
2	1	1	4	1	2	2	2	2	3	4	4	2	0	0	0	0	0	0	2	1	2	0	1	0	0	1	1	0	1	1	0	0	0	0	0	0	0	0	1	0	1	1	1	0	0	0	1	1	0
2	2	1	1	1	2	1	2	2	3	5	4	1	0	0	0	0	0	0	2	1	2	0	1	1	0	1	1	0	0	1	0	0	0	0	0	0	0	0	0	0	1	0	0	0	0	0	1	0	0
2	1	1	4	1	2	2	2	2	2	5	4	2	0	0	0	0	0	0	2	1	2	0	1	0	0	1	0	0	1	1	0	0	0	0	0	0	0	0	1	1	1	1	1	1	0	0	1	1	0
2	1	2	1	1	2	2	2	2	3	4	4	3	0	0	0	0	0	0	2	1	2	0	1	0	0	0	1	0	0	1	0	0	0	0	0	0	0	0	0	0	0	1	0	0	0	0	1	0	0
2	2	1	1	1	2	2	2	4	3	4	4	1	1	0	0	0	0	0	2	1	2	0	1	0	0	1	0	0	0	1	0	0	0	0	0	0	0	1	0	0	0	0	0	0	0	0	0	1	0
1	2	2	1	2	1	2	1	3	4	5	4	2	0	0	0	0	0	0	2	1	2	0	1	0	0	1	0	0	0	1	0	0	0	1	1	1	1	1	1	1	1	1	1	1	0	0	1	1	0
2	2	1	1	1	2	2	2	3	3	5	4	1	0	0	0	0	0	0	4	1	1	0	1	1	0	1	1	0	1	0	0	1	0	1	0	0	0	1	0	0	1	0	0	0	0	1	0	0	0
2	2	2	1	1	2	1	2	3	2	5	4	1	0	0	0	0	0	0	2	2	2	0	1	0	0	1	0	0	0	1	0	0	0	0	0	0	0	1	0	0	0	0	0	1	0	0	0	0	0
2	6	1	1	3	1	2	2	3	5	5	4	3	0	0	0	0	0	0	4	1	2	0	1	1	0	1	1	0	1	1	1	0	0	0	0	0	0	1	0	1	0	0	1	1	0	0	0	1	0
2	2	2	1	1	1	2	2	3	4	5	4	1	0	0	0	0	0	0	2	1	1	0	1	0	0	0	1	0	0	1	0	0	0	0	0	0	0	0	0	0	0	0	0	0	0	1	1	1	0
1	2	2	4	2	2	1	1	3	3	5	4	1	0	0	1	0	0	0	3	1	2	0	1	1	0	1	1	0	0	1	0	1	0	0	0	0	0	0	0	0	0	0	1	1	0	0	0	1	0
1	1	3	1	1	1	2	1	3	2	5	3	3	1	0	0	0	0	0	2	1	1	0	1	0	0	1	1	0	1	0	1	0	0	0	1	0	0	0	1	1	1	0	1	1	1	0	1	1	0
1	2	3	1	2	1	3	1	3	3	5	4	3	3	0	1	1	0	0	2	1	1	0	1	0	0	1	1	0	1	0	1	0	0	0	1	0	0	0	1	1	1	0	1	1	1	0	0	1	0
1	1	3	4	1	1	1	1	3	1	5	4	0	1	0	0	0	0	0	3	2	1	1	1	0	0	1	1	0	1	1	0	0	0	0	0	0	0	0	1	1	1	0	0	0	0	0	0	1	0
1	2	2	1	1	1	2	1	3	2	5	3	3	2	0	0	0	0	0	3	1	2	0	1	1	0	1	0	0	1	1	0	0	0	0	0	0	0	1	0	0	0	0	1	0	0	0	1	0	0
1	2	3	1	1	1	2	1	3	2	5	4	3	0	0	0	0	0	0	3	2	2	0	1	0	0	1	0	0	0	1	0	0	0	0	0	0	0	0	1	0	1	0	1	1	0	0	1	1	0
2	1	1	1	1	2	1	2	3	2	4	4	3	3	0	0	0	0	0	2	1	2	0	1	0	0	0	1	0	1	0	0	0	0	0	0	0	0	1	1	1	0	0	1	1	0	0	0	0	0
2	6	2	1	3	1	3	1	9	5	4	4	2	1	0	0	0	0	0	4	1	1	0	1	0	0	1	0	0	1	0	0	0	0	0	0	0	0	1	0	1	1	1	0	0	1	0	1	0	0
2	2	2	1	2	1	2	1	9	3	4	4	2	1	0	0	0	0	0	4	2	1	0	1	0	0	1	0	0	1	0	0	0	0	0	0	0	0	1	0	1	1	1	0	0	0	0	1	0	0
2	1	3	4	1	1	2	1	9	1	4	4	2	1	0	0	0	0	0	4	2	1	0	1	0	0	1	0	0	1	0	0	0	0	0	0	0	1	1	0	0	1	0	0	0	1	0	1	0	0
2	1	3	4	1	1	1	1	9	1	4	4	2	1	0	0	0	0	0	4	2	1	0	1	0	0	1	0	0	1	0	0	0	0	0	0	0	0	1	0	1	1	1	0	0	1	0	1	0	0
2	1	3	4	1	1	1	1	9	1	4	4	2	1	0	0	0	0	0	4	2	2	1	1	0	0	1	0	0	1	0	0	0	0	0	0	0	0	1	0	1	1	1	0	0	0	0	1	0	0
2	1	3	4	1	1	1	1	9	1	4	4	2	1	0	0	0	0	0	4	2	1	0	1	0	0	1	0	0	1	0	0	0	0	0	0	0	0	1	0	1	1	0	0	0	1	0	1	0	0
2	2	2	1	2	1	2	1	9	3	4	4	2	1	0	0	0	0	0	4	2	1	0	1	0	0	1	0	0	1	0	0	0	0	0	0	0	0	1	0	1	1	1	0	0	0	0	1	0	0
2	1	3	4	1	1	1	1	9	1	4	4	2	1	0	0	0	0	0	4	2	1	0	1	0	0	1	0	0	1	0	0	0	0	0	0	0	0	1	0	0	0	1	1	0	0	0	1	0	0
2	1	3	4	1	1	1	1	9	1	4	4	2	1	0	0	0	0	0	4	2	1	0	1	0	0	1	0	0	1	0	0	0	0	0	0	0	0	1	0	1	1	1	0	0	0	0	1	0	0
2	1	3	4	1	1	1	1	9	1	4	4	2	1	0	0	0	0	0	4	2	1	0	1	0	0	1	0	0	1	0	0	0	0	0	0	0	0	1	0	1	1	1	0	0	0	0	1	0	0
2	1	3	4	1	1	1	1	9	1	4	4	2	1	0	0	0	0	0	4	2	1	0	1	0	0	1	0	0	1	0	0	0	0	0	0	0	0	1	0	1	1	1	0	0	0	0	1	0	0
2	1	1	4	1	2	1	2	9	2	4	4	2	1	0	0	0	0	0	4	2	1	0	1	0	0	1	0	0	1	0	0	0	0	0	0	0	0	1	0	1	1	1	0	0	1	0	1	0	0
2	1	1	4	1	2	2	2	9	3	4	4	2	1	0	0	0	0	0	4	2	1	0	1	0	0	1	0	0	1	0	0	0	0	0	0	0	0	1	0	1	1	1	0	0	0	0	1	0	0
2	1	1	4	1	2	2	2	9	3	4	4	2	1	0	0	0	0	0	4	2	1	0	1	0	0	1	0	0	1	0	0	0	0	0	0	0	0	1	0	1	1	1	0	0	0	0	1	0	0
2	2	2	1	2	1	2	1	9	3	4	4	2	1	0	0	0	0	0	4	2	1	0	1	0	0	1	0	0	1	0	0	0	0	0	0	0	0	1	0	1	1	1	0	0	0	0	1	0	0
1	3	2	1	2	1	2	1	9	3	4	4	2	1	0	0	0	0	0	4	2	1	0	1	0	0	1	0	0	1	0	0	0	0	0	0	0	0	1	0	1	1	1	0	0	0	0	1	0	0
1	1	2	1	2	1	2	1	9	3	4	4	2	1	0	0	0	0	0	1	2	1	0	1	0	0	1	0	0	1	0	0	0	0	0	0	0	0	1	0	1	1	1	0	0	0	0	1	0	0
2	1	2	1	1	1	2	2	9	1	5	3	1	0	0	0	0	0	0	2	2	1	0	1	0	0	0	1	0	1	0	0	0	0	0	0	0	0	0	0	0	1	0	0	0	0	0	1	1	0
2	2	2	1	2	1	2	1	9	3	4	4	2	1	0	0	0	0	0	4	2	1	0	1	0	0	1	0	0	0	1	0	0	0	0	0	0	0	1	0	1	1	1	0	0	0	0	1	0	0
2	2	2	1	2	2	2	2	3	4	5	4	2	1	0	0	0	0	0	2	2	2	0	1	0	0	1	1	0	0	1	1	0	0	0	0	0	0	1	0	0	1	0	0	1	1	0	0	1	0
2	2	1	1	2	2	2	2	3	4	4	4	3	1	0	0	0	0	0	1	1	2	0	1	0	0	1	1	0	1	1	0	1	0	0	0	0	1	0	0	0	1	0	1	1	1	0	0	1	0
2	3	2	1	3	1	3	1	9	4	4	4	2	1	0	0	0	0	0	4	2	1	0	1	0	0	1	0	0	1	0	0	0	0	0	0	0	0	1	0	1	1	1	0	0	0	0	1	0	0
2	2	1	1	1	2	2	2	9	3	4	4	2	1	0	0	0	0	0	4	2	1	0	1	0	0	1	0	0	1	0	0	0	0	0	0	0	0	1	0	1	1	1	0	0	1	0	1	0	0
2	1	3	4	1	1	1	1	9	2	5	3	1	1	0	0	0	0	0	2	2	1	0	1	0	0	1	1	0	0	1	0	0	0	0	0	0	0	1	0	1	0	0	1	1	0	0	1	0	0
2	1	1	1	2	1	1	2	9	3	5	4	3	3	0	0	0	0	0	1	1	1	0	1	0	0	1	1	0	1	1	1	0	0	0	0	0	0	1	1	1	1	0	1	1	1	0	0	1	0
2	1	1	4	1	2	1	2	9	2	5	4	2	2	0	0	0	0	0	1	1	1	0	1	1	0	1	1	0	1	1	1	0	0	0	0	0	0	1	1	1	1	0	1	1	1	0	0	1	0
2	2	1	1	1	2	1	2	9	4	5	4	2	1	0	0	0	0	0	1	1	1	0	1	0	0	1	1	0	0	1	1	0	0	0	0	0	0	1	1	1	1	0	1	1	1	0	0	0	0
2	2	1	1	1	2	1	2	9	4	5	4	3	0	0	0	0	0	0	1	1	1	0	1	0	0	1	1	0	0	1	1	0	0	0	0	0	0	1	1	1	1	0	1	1	1	0	0	1	0
1	2	2	1	2	1	2	1	9	3	4	4	2	1	0	0	0	0	0	1	2	1	0	1	0	0	1	0	0	1	0	0	0	0	0	0	0	0	1	0	0	1	0	0	0	1	0	1	0	0
1	2	2	1	2	1	2	1	9	3	4	4	2	1	0	0	0	0	0	1	2	1	0	1	0	0	1	0	0	1	0	0	0	0	0	0	0	0	1	0	0	1	0	0	0	1	0	1	0	0
2	1	1	4	1	2	1	2	9	2	4	4	2	1	0	0	0	0	0	4	2	1	0	1	0	0	1	0	0	1	0	0	0	0	0	0	0	0	1	0	1	1	1	0	0	1	0	1	0	0
2	2	1	1	1	2	2	2	9	3	4	4	2	1	0	0	0	0	0	4	2	1	0	1	0	0	1	0	0	1	0	0	0	0	0	0	0	0	1	0	1	1	1	0	1	0	0	1	0	0
2	2	2	1	1	2	2	2	9	3	4	4	2	1	0	0	0	0	0	4	2	1	0	1	0	0	1	0	0	1	0	0	0	0	0	0	0	0	1	0	1	1	1	0	0	0	0	1	0	0
2	3	1	1	2	1	2	2	9	4	4	4	2	1	0	0	0	0	0	4	2	1	0	1	0	0	1	0	0	1	0	0	0	0	0	0	0	0	1	0	1	1	1	0	0	0	0	1	0	0
2	2	2	1	2	1	2	1	9	3	4	4	2	1	0	0	0	0	0	5	2	1	0	1	0	0	1	0	0	1	0	0	0	0	0	0	0	0	1	0	1	1	1	0	0	0	0	1	0	0
1	2	2	1	2	1	2	1	9	3	4	4	2	1	0	0	0	0	0	1	2	1	0	1	0	0	1	0	0	1	0	0	0	0	0	0	0	0	1	0	1	1	0	0	0	0	0	1	0	0
2	3	2	1	2	1	2	1	9	3	4	4	2	1	0	0	0	0	0	5	2	1	0	1	0	0	1	0	0	1	0	0	0	0	0	0	0	0	1	0	1	1	1	0	0	0	0	1	0	0
2	1	3	1	1	1	2	1	1	2	5	4	2	1	0	0	0	0	0	1	1	2	0	1	0	0	1	1	0	0	0	1	0	0	0	0	0	0	0	0	1	1	0	0	0	0	0	1	0	0
2	2	3	1	2	1	3	1	9	2	5	4	2	0	0	0	0	0	0	1	1	2	0	1	0	0	1	0	0	0	1	0	0	0	0	0	0	0	0	0	0	0	0	0	1	0	0	0	0	0
2	2	1	1	1	1	2	2	9	3	4	4	2	1	0	0	0	0	0	4	2	1	0	1	0	0	1	0	0	1	0	0	0	0	0	0	0	0	1	0	1	1	1	0	0	0	0	0	1	0
2	1	3	1	1	1	2	1	9	2	5	3	3	1	0	0	0	0	0	2	1	2	0	1	0	0	1	0	0	0	1	0	0	0	0	0	0	0	1	1	0	0	1	1	0	0	0	1	0	0
2	2	1	1	1	1	2	2	9	3	4	4	2	1	0	0	0	0	0	4	2	1	0	1	0	0	1	0	0	1	0	0	0	0	0	0	0	0	1	0	1	1	1	1	0	0	0	1	0	0
2	2	2	1	1	2	2	2	6	3	5	3	1	1	0	1	1	0	0	1	1	1	0	1	0	0	1	0	0	0	1	0	0	0	0	0	1	1	1	1	1	1	1	1	0	0	0	1	0	0
2	2	2	1	1	2	2	2	9	3	5	3	1	1	0	1	1	0	0	1	1	1	0	1	0	0	1	0	0	0	1	0	0	0	0	0	1	1	1	1	1	1	1	0	0	0	0	1	0	0
2	1	1	4	2	1	2	2	9	3	4	4	1	0	0	0	0	0	0	2	2	1	0	1	0	0	1	1	0	1	1	1	1	0	0	0	0	1	1	1	0	1	0	1	1	1	0	1	0	0
2	1	1	4	2	1	2	2	9	3	4	4	1	1	0	0	0	0	0	2	2	1	0	1	0	0	1	1	0	0	1	0	0	0	0	0	0	1	1	1	0	1	0	1	1	1	0	1	0	0
2	1	3	1	1	1	3	1	2	2	5	4	2	0	0	0	0	0	0	3	1	2	0	1	0	0	1	1	0	1	0	1	1	0	0	0	0	0	0	0	0	1	0	0	0	1	0	0	1	0
2	3	2	1	2	1	2	2	3	5	5	4	2	0	0	0	0	0	0	2	1	2	0	1	1	0	1	1	0	0	1	1	0	0	0	0	0	0	1	0	0	1	0	0	0	0	0	1	1	0
2	1	2	4	1	2	2	2	4	3	5	4	1	0	0	0	0	0	0	2	1	2	0	1	0	0	0	1	0	0	0	1	0	0	0	0	0	0	0	0	0	0	1	0	0	0	0	1	1	0
1	2	2	1	2	2	2	1	3	3	5	3	1	2	0	0	0	0	0	2	1	2	0	1	0	0	1	0	0	0	1	0	0	0	0	0	0	0	0	0	0	1	1	0	0	0	0	1	0	0
2	1	2	4	1	2	1	1	10	2	5	4	1	0	0	0	0	0	0	4	1	2	0	1	0	0	1	0	0	1	0	0	0	0	0	0	0	0	0	1	1	0	0	0	1	0	0	0	1	0
1	1	2	1	1	1	2	1	3	3	4	2	2	2	0	0	0	0	0	1	1	1	0	1	0	0	1	0	0	0	1	1	0	0	0	0	0	1	1	1	0	1	1	1	0	0	0	0	1	0
2	2	2	1	2	2	2	2	3	3	5	4	1	1	0	0	0	0	0	2	1	1	0	1	1	0	1	1	0	1	1	1	1	0	0	0	0	0	1	1	1	1	1	1	1	0	0	1	1	0
1	1	2	4	1	2	1	1	1	2	5	4	3	3	0	0	0	0	0	3	2	1	0	1	0	0	1	0	0	1	1	0	0	0	1	1	0	0	1	0	0	1	0	0	0	0	0	1	1	0
1	2	2	1	1	1	1	1	3	3	5	4	2	2	0	0	0	0	0	3	1	1	0	1	0	0	1	0	0	1	0	0	0	0	0	1	0	1	1	1	1	1	1	1	1	1	0	0	0	0
1	3	2	1	3	1	3	1	2	5	5	4	2	2	0	0	0	0	0	1	2	2	0	1	0	0	1	0	0	0	1	0	0	0	0	0	0	0	0	1	0	0	0	0	0	0	0	1	1	0
2	1	3	4	1	1	2	1	2	1	5	4	2	2	0	0	0	0	0	4	2	2	0	1	0	0	1	0	0	1	0	0	0	0	0	0	0	0	0	0	0	1	0	0	0	0	0	1	0	0
2	2	3	1	1	1	2	1	2	2	5	4	2	2	0	0	0	2	0	4	1	2	0	1	0	0	1	0	0	1	0	0	0	0	0	0	0	0	0	0	0	1	0	0	0	0	0	1	0	0
1	2	3	1	1	1	2	1	2	2	5	4	2	2	0	0	0	2	0	4	2	2	0	1	0	0	1	0	0	1	0	0	0	0	0	0	0	0	0	0	0	1	0	0	0	0	0	1	0	0
2	1	3	4	1	1	2	1	2	2	5	2	3	0	0	0	0	0	0	3	1	1	0	1	0	0	1	0	0	0	1	0	0	0	0	0	0	0	0	0	0	1	0	0	1	1	0	1	1	0
2	2	2	1	2	1	2	1	2	3	5	2	3	2	0	0	0	0	0	3	2	2	0	1	0	0	1	0	0	0	1	0	0	0	0	0	0	0	0	0	0	1	1	0	0	1	0	0	1	0
2	2	2	1	1	1	2	1	2	3	5	4	3	3	0	0	0	0	0	2	1	2	0	1	0	0	1	1	0	1	0	0	0	0	1	1	1	0	0	0	0	0	0	0	0	0	0	1	1	0
2	2	2	1	1	1	2	1	2	3	5	4	3	3	0	1	0	0	0	3	3	2	0	1	0	0	0	1	0	1	0	0	0	0	0	0	0	0	0	0	0	0	1	0	0	0	0	0	0	0
2	2	3	1	1	1	2	1	2	3	5	3	3	3	0	1	1	0	0	1	1	1	0	1	0	0	1	1	0	1	0	1	0	0	0	0	0	0	1	0	1	0	0	0	1	0	0	1	1	0
2	1	2	1	1	1	2	1	4	3	5	2	2	1	0	0	0	0	0	2	2	1	0	1	0	0	1	0	0	1	0	0	0	0	0	0	0	0	0	0	0	1	1	0	0	0	0	1	1	0
2	2	2	1	1	1	2	1	4	3	5	2	2	2	0	0	0	0	0	3	2	1	0	1	0	0	1	1	0	1	0	0	0	0	0	0	0	0	0	0	0	1	1	0	0	0	0	1	1	0
2	1	1	1	1	2	2	2	1	3	4	3	3	1	0	0	0	0	0	2	2	1	0	1	0	0	0	1	0	1	0	0	0	0	0	0	0	0	1	0	0	0	0	0	0	0	0	0	1	0
2	2	2	1	1	2	2	2	1	4	4	3	3	2	0	1	1	0	0	4	2	2	0	1	0	0	0	1	0	1	0	0	0	0	0	0	0	0	1	1	0	0	1	0	0	0	0	0	0	0
2	1	2	1	1	1	2	2	1	3	4	4	3	3	0	0	0	0	0	4	2	2	0	1	0	0	1	0	0	0	1	0	0	0	0	0	0	0	1	0	1	1	0	1	1	0	0	1	0	0
2	1	1	4	1	2	2	2	1	2	4	3	3	2	0	1	0	0	0	1	1	2	0	1	0	0	1	1	0	1	0	1	1	0	0	0	0	1	1	1	1	1	0	1	1	0	0	1	1	0
2	1	1	4	1	1	2	2	1	2	4	4	2	0	0	0	0	0	0	5	1	2	0	1	0	0	1	0	0	0	0	0	1	0	0	0	0	0	1	0	0	1	0	1	0	0	0	1	1	0
2	1	1	1	1	1	2	2	1	3	4	4	2	0	0	0	0	0	0	5	1	2	0	1	0	0	1	0	0	0	0	0	1	0	0	0	0	0	1	0	0	1	0	1	0	0	0	1	0	0
2	3	2	4	2	1	2	2	9	5	4	4	2	2	0	0	0	0	0	4	1	2	0	1	1	0	1	1	0	1	1	1	1	0	1	1	1	1	0	1	1	1	0	1	1	1	0	0	0	0
2	2	1	4	1	2	2	2	2	2	5	4	2	0	0	0	0	0	0	4	1	2	0	1	0	0	0	1	0	0	1	1	0	0	1	0	0	0	1	1	1	0	0	0	1	0	0	0	1	0
2	1	2	1	2	2	2	2	9	3	4	4	1	1	0	0	0	0	0	4	1	2	0	1	0	0	1	0	0	0	0	1	0	0	0	0	0	0	0	0	0	0	0	0	1	0	0	1	1	0
1	2	2	1	1	1	3	1	2	3	5	4	3	0	0	0	0	0	0	3	3	1	0	1	0	0	1	0	0	1	0	0	0	0	0	0	0	0	0	0	0	1	0	0	0	1	0	1	0	0
2	1	2	4	1	1	1	1	9	2	5	4	3	3	0	1	0	0	0	3	1	1	0	1	0	0	1	0	0	0	1	0	0	0	0	0	0	0	0	0	1	0	0	0	0	0	0	0	1	0
1	3	1	1	2	1	2	3	10	3	4	4	3	2	0	0	0	0	0	3	1	1	0	1	0	0	1	0	0	1	0	0	0	0	0	0	0	0	1	1	0	0	1	0	1	0	0	0	1	0
1	1	2	1	1	1	3	3	10	3	5	4	1	1	0	1	0	0	0	5	1	2	0	1	0	0	1	1	0	0	1	0	0	0	0	0	0	0	0	1	0	0	0	1	1	0	0	1	1	0
1	1	2	1	2	1	3	3	10	3	5	2	1	1	0	1	0	0	0	5	1	2	0	1	0	0	1	1	0	0	1	0	0	0	0	0	0	0	0	1	0	0	0	1	1	0	0	1	1	0
1	2	3	1	2	1	3	1	10	4	5	3	3	3	0	1	0	0	0	5	1	2	0	1	0	0	1	0	0	0	1	0	1	0	0	0	0	0	0	1	1	0	0	1	1	0	0	1	0	0
2	2	2	1	1	1	2	2	10	4	4	4	1	0	0	0	0	0	0	4	1	2	0	1	0	0	1	0	0	0	1	0	0	0	0	0	0	0	0	1	0	0	0	0	0	0	0	0	1	0
1	3	2	1	2	1	2	3	10	5	5	4	2	0	0	0	0	0	0	5	1	2	0	1	0	0	1	0	0	1	0	0	0	0	0	0	0	0	0	1	0	0	0	1	0	0	0	0	1	0
2	3	1	1	2	1	2	2	10	5	4	4	1	0	0	0	0	0	0	4	1	2	0	1	0	0	0	1	0	0	0	0	1	0	0	0	0	0	0	0	0	0	0	1	0	0	0	0	1	0
1	1	3	4	2	1	2	1	2	1	5	4	1	0	0	0	0	0	0	2	1	1	0	1	0	0	1	1	0	1	0	0	1	0	0	0	0	0	0	0	0	1	0	0	1	0	0	1	1	0
2	1	2	4	1	1	2	1	9	2	5	3	0	1	0	0	0	0	0	1	2	1	0	1	0	0	1	0	0	0	0	0	1	0	0	0	0	0	0	0	0	0	0	0	0	0	1	0	1	0
1	2	2	1	2	1	3	1	9	4	5	2	1	0	0	0	0	0	0	3	2	2	0	1	0	0	1	0	0	0	0	0	0	1	0	0	0	0	0	0	1	0	0	0	0	0	0	0	0	0
1	1	2	1	1	1	2	1	9	2	4	3	1	1	0	0	0	0	0	1	1	2	0	1	0	0	1	0	0	1	0	0	0	0	0	1	0	0	1	0	0	0	1	0	0	0	0	1	1	0
1	1	2	1	1	1	2	1	9	3	5	3	1	0	0	0	0	0	0	4	2	2	0	1	0	0	0	1	0	0	1	0	0	0	0	0	0	0	0	0	0	0	1	0	0	0	0	0	1	0
1	1	3	1	1	1	2	1	9	3	5	3	1	0	0	0	0	0	0	4	2	2	0	1	0	0	0	1	0	0	1	0	0	0	0	0	0	0	0	0	0	0	1	0	0	0	0	0	1	0
2	3	3	1	3	1	3	1	6	5	4	2	2	0	0	0	0	0	0	1	1	1	0	1	0	0	1	0	0	1	0	0	0	0	0	0	0	0	0	1	1	1	0	0	1	0	0	0	1	0
2	1	3	1	1	1	2	1	2	2	5	4	2	0	0	0	0	0	0	3	1	2	0	1	1	0	1	1	0	1	0	1	1	0	0	0	0	0	1	0	1	1	0	0	0	0	0	0	1	0
2	2	2	1	2	1	2	1	6	3	5	4	2	1	0	0	0	0	0	2	1	2	0	1	1	0	1	0	0	0	1	1	0	0	0	0	0	0	1	1	0	0	0	0	1	0	0	1	0	0
2	6	2	1	3	1	3	1	2	5	5	4	3	2	0	0	0	0	0	1	1	2	0	1	1	0	1	1	0	1	0	0	0	0	0	0	0	0	0	0	0	1	0	0	0	0	0	0	1	0
2	2	3	1	2	1	2	1	6	3	5	4	2	0	0	0	0	0	0	2	1	2	0	1	1	0	1	0	0	0	1	0	0	0	0	0	0	0	0	0	0	1	0	1	0	1	0	0	1	0
1	2	2	1	2	2	3	1	6	3	4	4	1	0	0	0	0	0	0	2	1	2	1	1	0	0	1	1	0	0	0	1	0	0	0	0	0	0	1	0	0	0	0	0	1	0	0	1	0	0
1	1	2	1	1	1	1	1	2	3	5	4	2	0	0	0	0	0	0	3	1	2	0	1	0	0	1	1	0	1	1	1	0	0	0	0	0	1	1	0	1	1	0	0	0	0	0	0	0	0
2	2	2	1	1	2	2	2	2	4	5	4	1	0	0	0	0	0	0	2	3	2	0	1	0	0	0	1	0	0	1	0	0	0	0	0	0	0	0	0	0	1	0	0	0	0	0	1	1	0
2	1	1	4	1	1	1	2	2	2	5	4	1	0	0	0	0	0	0	4	1	2	0	1	0	0	1	1	0	1	0	0	0	0	0	0	0	0	0	0	0	1	1	1	1	0	0	1	1	0
1	1	2	1	1	2	1	1	2	3	5	4	3	1	0	2	0	0	0	3	1	2	0	1	0	0	1	0	0	1	0	0	0	0	0	0	0	0	0	0	0	1	0	0	0	0	0	0	1	1
1	6	1	1	3	1	3	1	1	3	5	4	2	2	0	2	2	0	0	1	1	2	0	1	0	0	1	1	0	1	0	1	0	0	0	0	0	0	1	1	1	0	0	0	0	0	0	1	0	0
1	2	2	1	2	2	1	1	1	4	5	4	2	1	0	0	0	0	0	3	2	1	0	1	0	0	1	0	0	1	0	0	0	0	0	0	0	1	0	0	1	1	0	0	0	0	0	0	1	0
1	2	2	1	1	1	2	1	1	2	4	4	3	3	0	0	0	0	0	1	2	1	0	1	0	0	1	0	0	0	1	0	0	0	0	0	0	0	0	0	0	0	0	0	0	1	0	0	0	0
1	2	2	4	1	1	2	1	1	3	4	4	1	0	0	0	0	0	0	1	1	2	0	1	0	0	0	1	0	1	0	0	0	0	0	0	0	0	0	0	0	0	0	0	0	1	0	0	0	0
2	2	3	1	1	1	3	1	1	2	3	3	2	0	0	0	0	0	0	1	1	2	0	1	0	0	1	1	0	1	1	0	0	0	0	0	0	0	1	1	1	1	1	0	1	0	0	0	1	0
1	3	3	1	2	1	2	1	3	4	5	3	0	1	0	0	0	0	0	3	1	2	0	1	0	0	1	1	0	0	1	0	0	0	0	0	0	0	0	0	0	0	0	0	0	1	0	1	0	0
1	2	3	1	2	1	1	1	3	3	5	4	3	1	0	0	0	0	0	2	1	2	0	1	0	0	1	0	0	0	0	1	0	0	0	0	0	0	0	0	0	1	0	0	0	0	0	0	0	0
1	3	3	1	3	1	3	1	3	5	5	4	2	1	0	0	0	0	0	2	1	2	0	1	0	0	1	1	0	1	0	0	1	0	0	0	0	0	0	0	0	1	0	0	0	1	0	1	1	0
1	2	3	1	2	1	2	1	3	3	5	4	3	2	0	0	0	0	0	2	1	2	0	1	0	0	1	1	0	1	1	0	0	0	0	1	0	0	1	1	1	1	1	0	1	0	0	1	1	0
1	2	3	1	2	1	3	1	3	3	5	4	1	0	0	0	0	0	0	1	2	1	0	1	0	0	1	0	0	1	0	0	0	0	0	0	0	0	0	0	0	0	0	1	0	0	0	0	0	0
1	1	2	1	1	1	3	1	9	2	5	4	2	1	1	2	1	0	0	2	1	1	0	1	0	0	1	0	0	0	1	0	0	0	1	1	0	0	1	1	1	1	1	1	1	1	0	0	1	0
2	1	3	4	1	1	2	1	9	2	5	4	1	0	0	0	0	0	0	1	2	2	0	1	0	0	1	0	0	0	1	0	0	0	0	0	0	0	0	0	1	0	0	0	0	0	0	0	0	0
2	1	3	4	1	1	2	1	2	1	5	4	2	2	0	0	1	1	1	2	1	2	0	1	0	0	1	0	0	0	1	0	0	0	0	0	0	0	1	1	1	0	0	1	0	1	0	1	1	0
2	6	2	1	3	1	3	1	9	5	4	3	1	1	0	0	0	0	0	2	1	2	0	1	0	0	1	1	0	1	1	1	1	1	0	0	0	0	0	1	1	0	0	1	1	0	0	1	1	0
2	2	2	4	1	1	1	1	3	3	5	4	1	1	0	1	1	0	0	4	1	2	0	1	0	0	0	1	0	0	1	1	1	0	1	0	0	0	1	0	0	0	1	0	0	1	0	1	0	0
2	1	1	1	1	1	1	2	10	2	5	4	1	1	0	0	0	0	0	2	1	1	1	0	0	0	1	0	0	1	0	0	0	0	0	0	0	0	1	0	1	0	0	0	0	1	0	0	1	0
2	2	2	1	1	1	2	2	2	3	5	4	3	1	0	1	1	0	0	2	1	2	0	1	0	0	0	1	0	0	1	0	0	0	0	0	0	0	1	0	0	1	0	0	0	0	0	1	1	0
2	1	2	4	1	1	2	2	10	2	5	4	2	0	0	0	0	0	0	2	2	2	0	1	0	0	1	1	0	1	0	1	0	0	0	0	0	0	0	1	0	0	0	0	0	0	0	0	0	0
2	1	3	4	1	2	2	1	10	2	5	4	3	0	0	0	0	0	0	2	2	2	0	1	0	0	1	0	0	0	1	0	0	0	0	0	0	0	1	0	0	1	0	0	0	0	0	0	1	0
2	3	2	1	3	1	3	3	10	5	5	4	1	0	0	0	0	0	0	5	1	2	0	1	0	0	1	0	0	0	0	0	1	0	0	0	0	0	0	1	0	0	0	0	0	0	0	1	1	0
1	2	3	4	2	1	2	1	10	3	5	4	2	1	0	0	0	0	0	1	2	1	0	1	0	0	1	0	0	0	1	0	0	0	0	0	0	1	0	1	1	0	0	0	0	0	0	1	0	0
1	3	2	1	2	1	3	1	9	4	5	4	1	0	0	0	0	0	0	3	1	2	0	1	0	0	1	0	0	1	0	0	0	0	0	0	0	0	1	0	0	0	1	0	0	1	0	0	0	0
1	2	3	1	2	1	2	1	9	3	5	4	2	1	0	0	0	0	0	2	1	2	0	1	0	0	0	1	0	0	0	0	1	0	0	0	0	0	1	0	0	1	1	0	0	1	0	0	1	0
2	2	3	1	1	2	2	1	9	2	5	4	0	1	0	0	0	0	0	2	2	1	0	1	0	0	1	0	0	0	1	0	0	0	0	0	0	0	0	0	0	1	0	0	0	0	0	0	1	0
2	1	3	4	1	2	1	1	9	2	5	4	3	0	0	0	0	0	0	3	1	2	0	1	0	0	1	0	0	0	1	0	0	0	0	0	0	0	1	0	0	0	0	0	0	0	0	0	0	0
2	1	3	4	1	2	2	1	9	2	5	3	2	1	0	0	0	0	0	3	3	2	0	1	0	0	1	0	0	0	1	0	0	0	0	0	0	0	1	0	0	0	0	0	0	0	0	1	0	0
2	3	3	1	3	1	2	1	9	5	5	4	1	0	0	0	0	0	0	2	1	2	0	1	0	0	1	0	0	0	0	0	1	0	0	0	0	0	1	0	0	1	0	0	1	0	0	0	1	0
1	2	3	1	2	1	2	1	9	3	5	4	1	0	0	0	0	0	0	2	1	2	0	1	0	0	1	0	0	0	1	0	0	0	0	0	0	0	0	0	1	0	0	0	0	0	0	0	0	0
2	2	3	1	2	1	2	1	9	3	4	4	3	3	0	0	0	0	0	1	2	1	0	1	0	0	1	0	1	1	1	0	0	0	1	0	0	0	0	0	0	0	0	0	0	0	0	1	1	0
2	1	2	1	1	1	1	2	2	2	4	4	3	0	0	0	0	0	0	2	2	2	1	0	0	0	0	1	0	1	0	0	0	0	0	0	1	0	1	0	0	1	0	0	1	0	0	1	0	0
2	1	2	1	1	1	2	2	2	3	4	4	2	0	0	0	0	0	0	2	1	2	1	0	0	0	0	1	0	0	0	0	1	0	0	0	0	0	1	0	0	0	0	0	0	0	0	1	0	0
2	2	3	1	1	2	2	1	1	2	5	4	1	0	0	0	0	0	0	2	1	1	0	1	0	0	0	1	0	0	1	0	0	0	0	0	0	0	1	0	0	1	0	0	0	0	0	0	1	0
2	2	2	1	1	2	2	1	1	2	4	4	1	0	0	0	0	0	0	1	2	1	0	1	0	0	1	0	0	1	0	0	0	0	0	0	0	0	0	0	0	1	0	0	0	0	0	0	1	0
2	1	3	4	1	1	2	1	9	2	5	4	1	0	0	1	0	0	0	1	1	2	1	0	0	0	0	1	0	0	0	0	1	0	0	0	0	0	1	1	1	0	0	0	0	0	0	0	1	0
2	2	3	1	2	1	3	1	9	3	5	3	3	3	0	0	0	0	0	2	2	1	1	1	1	0	1	0	0	1	1	1	0	0	0	0	0	1	0	1	1	1	0	1	1	0	0	1	0	0
1	2	3	1	2	1	2	1	9	3	5	4	3	2	0	0	0	0	0	1	1	2	0	1	0	0	1	0	0	1	1	0	0	0	1	0	0	1	0	1	0	1	0	0	0	0	0	1	1	0
1	1	3	1	1	1	2	1	9	2	5	4	3	2	0	0	0	0	0	1	1	2	0	1	0	0	1	0	0	1	1	0	0	0	1	0	0	1	0	1	0	1	1	0	0	0	0	1	1	0
2	1	3	4	1	1	1	1	9	2	5	4	1	2	0	2	2	2	1	2	2	2	0	1	0	0	1	0	0	1	0	0	0	0	0	0	0	1	0	0	0	0	0	0	0	0	0	0	1	0
2	2	3	1	1	2	2	1	9	2	5	4	3	1	0	0	0	0	0	2	2	1	0	1	0	0	1	1	0	1	0	0	1	0	0	0	0	0	0	1	0	0	0	0	0	0	0	1	1	0
2	2	3	1	2	1	2	1	9	3	5	3	2	0	0	0	0	0	0	2	2	2	1	1	0	0	1	0	1	1	0	0	0	0	0	0	0	1	0	0	0	0	0	1	0	0	0	1	1	0
2	1	2	1	1	1	2	2	9	3	5	4	1	0	0	0	0	0	0	4	1	2	1	0	0	0	1	0	0	0	0	0	1	0	0	0	1	0	1	0	0	1	0	1	0	0	0	1	1	0
2	2	2	1	2	1	2	2	9	4	5	4	1	1	0	0	0	0	0	4	1	2	0	0	1	0	1	0	0	0	1	0	0	0	0	0	0	0	0	0	0	0	1	0	0	0	0	0	1	0
2	2	3	1	1	1	2	2	9	3	5	4	3	0	0	0	0	0	0	1	1	1	0	1	0	0	1	1	0	0	1	1	0	0	0	0	0	0	1	1	0	1	0	0	0	0	0	0	1	0
1	1	3	4	1	1	2	1	9	1	5	4	1	1	0	0	0	0	0	2	3	1	0	0	1	0	1	0	0	0	1	0	0	0	0	0	0	1	1	0	0	0	0	1	1	0	0	1	0	0
2	2	3	1	2	1	3	2	9	3	5	4	2	0	0	0	0	0	0	4	2	2	0	1	0	0	0	1	0	1	0	0	0	0	0	0	0	0	1	0	1	0	0	1	1	0	0	0	1	0
1	2	3	1	1	1	2	1	9	2	5	3	2	0	0	1	0	0	0	5	3	2	0	1	0	0	1	0	0	0	1	0	0	0	0	0	1	0	0	0	0	0	0	0	1	0	0	0	1	0
2	2	3	1	2	1	3	1	9	3	4	4	2	2	0	0	0	0	0	1	1	1	0	1	0	0	1	0	0	0	0	1	0	0	0	0	0	0	0	0	0	1	0	0	0	0	0	0	1	0
1	1	2	4	1	2	2	3	9	2	4	4	1	1	0	0	0	0	0	5	1	1	0	1	0	0	0	1	0	0	1	0	0	0	0	0	0	0	1	0	0	0	1	0	0	0	0	0	1	0
2	2	2	1	2	1	3	1	9	3	4	4	1	1	0	0	0	0	0	1	1	2	0	1	0	0	0	1	0	0	1	0	0	0	0	0	0	0	0	0	0	1	1	0	0	0	0	0	1	0
2	3	2	1	3	1	3	1	9	3	4	4	2	2	0	1	1	0	0	1	1	1	0	1	0	0	1	0	0	0	1	0	0	0	0	0	0	0	1	0	0	1	0	1	0	0	0	0	1	0
2	2	3	1	2	1	3	1	9	3	4	4	1	2	0	0	0	0	0	1	1	2	0	1	0	0	0	1	0	1	0	0	0	0	0	0	0	0	0	0	0	0	0	1	0	0	0	0	1	0
2	2	2	1	2	1	3	2	9	3	5	4	3	0	0	0	0	0	0	2	2	1	0	1	0	0	1	0	0	0	1	0	0	0	0	0	0	1	0	1	1	1	1	1	1	1	0	1	1	0
2	2	2	1	1	1	2	2	9	4	5	4	3	0	0	0	0	0	0	4	2	2	0	1	0	0	1	0	0	1	1	0	0	0	0	0	0	1	0	1	0	0	0	1	1	0	0	1	1	0
2	2	2	1	1	1	2	2	9	4	5	4	2	0	0	0	0	0	0	4	1	2	0	1	0	0	1	0	0	0	1	0	0	0	0	0	0	1	1	1	0	0	0	1	0	0	0	1	1	0
2	2	1	1	1	1	2	2	9	4	5	4	1	0	0	0	0	0	0	4	1	2	0	0	1	0	1	0	0	1	1	0	0	0	0	0	0	1	1	0	0	1	1	1	0	0	0	0	1	0
2	2	2	1	2	1	2	2	9	4	5	2	2	0	0	0	0	0	0	4	1	1	0	1	0	0	1	0	1	0	0	0	0	0	0	0	0	1	1	0	0	0	0	1	0	0	0	1	0	0
1	2	3	1	2	1	2	1	9	3	5	3	2	0	0	0	0	0	0	4	1	2	1	1	1	0	1	1	0	1	1	0	1	0	0	0	1	1	1	0	0	0	0	0	0	1	0	1	0	0
1	2	3	1	3	1	4	1	9	4	5	4	1	1	0	0	0	0	0	2	1	2	0	1	0	0	1	0	0	0	0	1	0	0	0	0	0	0	0	0	0	0	0	0	0	1	0	0	0	0
2	1	2	1	1	1	2	2	6	3	5	4	3	0	0	0	0	0	0	7	1	2	0	1	0	0	1	1	0	1	1	0	0	0	0	0	0	0	0	0	1	1	1	0	1	1	0	0	1	0
2	1	1	4	1	1	1	2	6	2	4	4	1	0	0	0	0	0	0	2	1	1	0	1	0	0	1	0	0	0	0	1	0	0	0	0	0	0	1	0	1	1	0	0	1	0	0	1	1	0
2	1	3	4	1	1	2	2	6	2	5	4	3	0	0	0	0	0	0	2	2	1	0	1	0	0	1	1	0	0	1	0	0	0	0	0	0	0	1	0	0	1	0	0	0	0	0	0	1	0
2	1	3	1	1	1	2	2	6	3	5	4	3	0	0	0	0	0	0	2	2	1	0	1	0	0	1	1	0	0	1	0	0	0	0	0	0	0	1	0	1	1	0	0	0	0	0	0	1	0
2	1	3	4	1	2	2	1	2	2	4	4	2	0	0	0	0	0	0	2	1	1	0	1	0	0	1	0	0	1	0	0	0	0	0	0	0	1	0	1	1	1	1	0	0	0	0	1	0	0
2	1	3	1	1	1	2	1	6	2	5	3	3	1	0	0	0	0	0	2	1	2	0	1	0	0	1	0	0	0	1	0	0	0	1	0	0	0	0	0	0	0	0	0	0	0	0	0	0	0
2	2	3	1	1	1	2	1	6	3	5	4	1	1	0	1	0	0	0	1	2	2	0	1	0	0	0	1	0	0	1	0	0	0	0	0	0	0	0	0	1	0	0	1	0	0	0	1	0	0
2	1	2	4	1	1	2	2	4	2	5	4	2	3	0	0	0	0	0	2	1	2	0	1	0	0	0	1	0	0	1	0	0	0	0	0	0	0	0	0	0	1	0	0	1	0	0	1	1	0
2	1	1	4	1	2	1	2	2	2	5	4	2	0	0	0	0	0	0	2	1	2	0	1	0	0	1	0	0	0	1	0	0	0	0	0	0	0	1	0	0	1	0	0	0	0	0	0	0	0
2	1	2	1	2	1	2	2	2	3	5	4	3	3	0	0	0	0	0	2	1	2	0	1	0	0	1	1	0	1	0	1	1	0	0	0	0	0	1	0	0	1	1	0	1	0	0	1	1	0
2	1	1	1	1	2	1	2	2	2	4	4	2	2	0	0	0	0	0	2	1	1	0	1	0	0	1	1	0	1	1	0	0	0	0	0	0	0	1	1	1	1	1	1	0	0	0	0	1	0
2	1	2	4	1	2	2	2	2	2	4	4	2	0	0	0	0	0	0	7	1	2	0	1	0	0	0	1	0	0	1	1	0	0	0	0	0	0	1	0	0	1	0	0	1	0	0	1	1	0
2	2	2	1	1	1	2	2	4	3	5	4	2	0	0	0	0	0	0	2	1	2	0	1	0	0	0	1	0	0	1	0	0	0	0	0	0	0	0	0	0	0	0	1	0	0	0	0	0	0
2	3	1	1	2	1	2	2	2	5	5	4	1	0	0	0	0	0	0	4	1	2	0	1	0	0	0	1	0	0	0	1	0	0	0	0	0	0	1	0	0	1	1	1	1	0	0	0	1	0
2	1	2	1	1	1	2	2	2	2	4	4	2	1	0	0	0	0	0	2	1	2	0	0	1	0	1	1	0	1	0	0	0	0	0	0	0	0	1	1	0	1	1	0	1	0	0	1	1	0
2	1	1	4	2	1	2	2	2	3	4	4	3	0	0	0	0	0	0	2	1	2	0	1	0	0	1	1	0	1	0	0	0	0	0	0	0	0	1	1	0	1	1	0	1	0	0	1	1	0
2	3	2	1	3	1	3	1	4	5	5	4	2	0	0	0	0	0	0	3	1	2	0	1	0	0	1	0	0	0	1	1	0	0	0	0	0	0	0	0	0	1	0	0	0	0	0	0	1	0
2	1	3	1	1	1	2	1	2	2	5	4	2	0	0	0	0	0	0	2	1	2	0	1	0	0	1	1	0	0	1	0	0	0	1	0	0	0	1	0	0	1	1	0	1	1	0	0	1	0
2	2	3	1	1	2	2	1	10	2	5	3	2	0	0	0	0	0	0	3	1	2	0	1	0	0	1	1	0	1	1	1	1	0	1	1	0	1	1	1	1	1	1	1	1	1	0	1	1	0
2	3	2	1	2	1	2	2	1	5	5	4	3	2	0	0	0	0	0	2	1	2	0	1	0	0	1	0	0	0	0	1	1	1	0	0	0	1	1	0	0	1	0	0	1	0	0	1	1	0
2	1	3	4	1	2	1	1	1	1	5	4	3	0	0	0	0	0	0	3	1	2	0	1	0	0	1	0	0	1	0	0	0	0	0	0	0	1	1	0	0	0	0	0	0	0	0	0	0	0
2	1	3	1	1	2	1	1	4	2	5	4	3	0	0	0	0	0	0	2	1	2	0	0	0	1	1	0	1	0	0	0	0	0	0	0	0	0	0	0	1	1	1	1	1	1	0	0	0	0
2	1	3	4	1	1	2	1	4	1	5	2	3	0	0	0	0	0	0	2	1	2	0	1	0	0	1	1	0	0	1	1	0	0	0	0	0	0	0	0	0	0	0	1	0	0	0	0	0	0
1	3	2	1	3	1	3	1	2	4	5	2	3	3	0	0	0	0	0	7	1	2	0	1	0	0	1	1	0	1	1	1	1	0	0	0	0	1	0	1	1	1	0	0	1	0	0	1	0	0
1	1	3	1	1	1	2	1	3	2	4	4	0	1	0	0	0	0	0	2	1	2	0	1	0	0	1	0	0	1	0	0	0	0	0	0	0	0	1	0	0	0	0	0	0	0	0	0	1	0
2	1	2	4	1	1	2	1	6	2	5	4	2	1	0	0	0	0	0	2	1	2	0	1	0	0	0	1	0	1	0	0	0	0	0	0	0	0	0	1	0	1	0	0	0	0	0	1	0	0
2	2	3	1	1	2	2	1	2	2	5	4	3	2	0	0	0	0	0	3	1	2	0	1	0	0	1	1	0	1	1	0	0	0	0	0	0	0	0	0	0	1	0	0	1	1	0	0	0	0
2	3	3	1	3	1	3	1	2	4	5	2	1	0	0	0	0	0	0	1	1	1	0	1	0	0	1	1	0	0	1	0	1	0	0	0	0	0	0	0	1	0	0	0	0	0	0	1	0	0
2	2	3	1	2	2	2	1	2	3	5	4	3	1	0	0	0	0	0	1	2	1	0	1	0	0	1	0	0	0	1	0	1	0	0	0	0	0	0	1	0	0	0	0	0	0	0	1	0	0
2	1	1	1	1	1	2	2	4	3	4	4	2	0	0	0	0	0	0	2	1	2	0	1	0	0	1	0	0	0	0	1	0	0	0	0	0	0	0	0	0	0	1	0	0	0	0	0	1	0
2	1	2	4	1	1	1	2	3	1	5	3	1	0	0	0	0	0	0	4	1	2	0	1	0	0	1	0	0	0	1	0	0	0	0	0	0	0	0	0	0	0	0	1	0	0	0	1	1	0
2	2	2	1	1	2	2	2	3	3	5	4	1	0	0	0	0	0	0	2	1	2	0	1	0	0	1	1	0	0	1	0	0	0	0	0	0	0	0	0	0	0	0	0	0	1	0	1	0	0
2	2	2	1	1	2	2	2	3	3	5	4	2	0	0	0	0	0	0	4	2	2	1	0	0	0	1	0	0	1	0	0	0	0	0	0	0	1	0	0	0	0	0	0	0	0	0	0	0	0
2	3	2	1	2	1	2	2	3	5	5	4	3	0	0	1	1	0	0	3	1	2	0	1	0	0	1	1	0	1	1	1	0	0	0	0	0	0	1	0	0	0	0	0	0	1	0	1	0	0
1	2	2	1	2	1	3	1	3	4	4	3	3	1	0	0	0	0	0	2	1	2	0	1	0	0	1	0	0	1	0	0	0	0	0	0	0	0	1	0	0	0	0	1	0	0	0	1	0	0
1	2	3	1	2	1	2	1	3	3	5	3	1	0	0	0	0	0	0	2	2	1	0	1	0	0	1	0	0	0	1	0	0	0	0	0	1	0	0	0	0	0	0	0	0	0	0	0	0	0
2	2	3	1	2	1	3	1	3	3	3	1	0	1	0	0	0	0	0	2	2	2	0	1	0	0	1	0	0	0	1	0	0	0	0	0	0	0	1	0	0	0	0	0	0	0	0	1	1	0
1	6	2	1	3	1	3	1	3	3	5	4	0	1	0	0	0	0	0	7	3	1	0	0	0	1	1	0	0	0	0	1	0	0	0	0	0	0	1	0	0	0	0	0	0	0	0	0	0	0
1	3	2	1	3	1	3	1	3	5	5	3	1	0	0	0	0	0	0	3	1	2	0	1	0	0	1	1	0	1	0	0	0	0	0	1	0	0	0	0	0	0	0	0	0	0	0	0	1	0
1	2	3	1	2	1	3	1	3	3	5	4	1	1	0	0	0	0	0	3	2	1	0	1	0	0	0	1	0	0	1	0	0	0	0	0	0	0	1	0	0	0	1	0	0	0	0	0	1	0
1	2	3	1	2	1	2	1	3	4	5	2	1	0	0	0	0	0	0	3	1	2	0	1	0	0	0	1	0	0	1	0	0	0	0	0	0	0	1	0	0	1	0	0	0	0	0	1	0	0
2	2	2	1	2	1	2	1	3	3	5	4	3	2	0	0	0	0	0	2	1	2	0	1	0	0	1	1	0	0	1	0	0	0	1	1	1	1	1	1	1	1	1	1	1	1	0	0	1	0
1	2	3	1	2	1	3	1	3	3	5	3	2	2	0	0	0	0	0	1	2	1	0	1	0	0	1	0	0	0	1	0	0	0	1	1	0	0	1	1	1	1	0	0	1	1	0	1	1	0
2	1	3	1	1	1	2	1	3	1	5	4	1	1	0	0	0	0	0	2	1	1	0	1	0	0	1	1	0	1	1	0	0	0	0	0	0	0	1	0	1	0	0	1	0	0	0	1	0	0
2	6	3	1	3	1	3	1	3	3	5	4	1	0	0	0	0	0	0	3	1	2	0	1	0	0	1	0	0	0	0	0	1	0	1	1	1	1	1	1	1	1	1	0	1	1	0	1	0	0
2	2	3	1	2	1	2	1	3	2	5	4	0	1	0	0	0	0	0	1	2	2	0	1	0	0	0	1	0	1	0	0	0	0	0	0	0	0	1	1	1	0	0	0	1	0	0	1	0	0
2	3	2	1	3	1	3	1	9	4	5	4	1	0	0	0	0	0	0	1	2	2	0	1	0	0	1	0	0	1	0	0	0	0	0	0	0	1	1	0	0	0	0	0	0	0	0	0	0	0
2	1	2	4	1	1	2	1	9	1	4	4	1	0	0	0	0	0	0	2	1	1	1	1	0	0	1	1	0	1	0	0	0	0	0	0	0	0	1	0	0	0	0	0	0	0	0	1	1	0
2	3	2	1	3	1	3	1	9	4	5	4	2	2	0	0	0	0	0	1	1	2	0	1	0	0	0	1	0	0	1	0	0	0	0	0	1	1	0	0	1	0	0	0	0	0	1	0	1	0
2	2	2	4	2	1	3	1	9	3	4	4	3	0	0	0	0	0	0	1	2	1	0	1	0	0	1	0	0	0	1	0	0	0	0	0	0	0	1	0	0	0	0	0	0	0	0	0	1	0
1	1	1	4	1	1	1	3	9	2	4	4	2	2	0	1	0	0	0	7	1	1	0	1	0	0	1	0	0	0	1	0	0	0	0	0	0	0	1	1	1	1	1	0	0	0	0	1	1	0
2	2	2	1	2	1	2	2	2	4	5	4	3	3	0	3	0	0	0	4	1	2	0	1	0	0	1	1	0	1	1	1	1	0	1	1	0	0	1	0	0	1	1	0	1	0	0	1	0	0
2	1	2	4	1	2	1	3	9	2	4	4	3	2	0	0	0	0	0	7	1	2	0	1	0	0	1	1	0	1	1	0	1	0	0	0	0	0	0	0	1	0	0	1	1	0	0	1	1	0
1	1	2	4	1	1	2	1	10	2	3	3	2	2	0	0	0	0	0	3	1	1	1	1	1	0	1	1	0	1	1	1	1	0	1	0	0	1	1	0	1	0	0	1	0	0	0	0	0	1
2	2	2	1	2	1	3	1	10	3	4	3	3	2	0	0	0	0	0	5	2	1	0	1	0	0	1	1	0	1	1	0	0	0	0	0	0	0	1	1	1	1	1	1	1	0	0	0	0	0
1	1	1	4	1	1	1	3	9	2	5	4	2	2	0	1	0	0	0	7	1	1	0	1	0	0	1	0	0	1	1	0	0	0	0	0	0	0	1	1	1	1	0	1	1	0	0	1	1	0
2	2	2	4	1	1	2	1	10	3	3	3	2	2	0	0	0	0	0	3	1	1	1	1	0	0	1	1	0	0	1	1	1	0	0	1	0	1	1	0	0	0	0	1	0	0	0	0	0	1
2	1	3	1	1	1	2	3	10	3	4	4	2	1	0	0	0	0	0	3	1	2	1	1	0	0	1	1	0	0	1	1	0	0	0	0	0	0	1	1	0	0	1	1	0	0	0	0	0	0
2	1	1	4	1	1	1	3	9	1	4	4	3	2	0	0	0	0	0	7	1	2	0	1	0	0	1	0	0	0	1	0	0	0	0	0	0	0	1	1	0	0	0	1	0	0	1	0	1	0
1	1	2	4	1	1	2	3	9	2	4	4	2	0	0	0	0	0	0	1	1	1	0	1	0	0	1	0	0	0	0	0	1	0	0	0	0	0	0	1	0	0	0	0	0	0	0	1	1	0
1	2	3	1	2	1	3	1	3	3	5	4	3	2	0	0	0	0	0	2	2	1	0	1	0	0	1	0	0	0	1	0	0	0	1	0	0	0	0	0	0	0	0	0	0	1	0	0	1	0
1	1	2	4	1	1	2	1	2	2	5	4	2	2	0	0	0	0	0	2	1	2	0	1	0	0	1	1	0	0	1	1	1	0	1	1	0	0	0	0	0	1	0	0	1	0	0	1	0	0
2	2	2	1	1	1	3	1	9	3	5	4	1	0	0	0	0	0	0	1	1	1	0	1	0	0	1	0	0	1	0	0	0	0	0	0	0	0	1	1	0	0	0	1	0	0	0	1	1	0
2	2	3	1	2	1	1	1	9	3	5	4	3	3	0	0	0	0	0	3	1	2	0	1	0	0	0	1	0	0	0	0	1	0	0	0	0	0	0	1	0	1	1	1	1	1	0	1	0	0
2	1	2	4	1	1	1	1	9	1	5	4	2	0	0	0	0	0	0	1	2	2	0	1	0	0	0	1	0	0	1	0	0	0	0	0	0	0	0	1	1	0	0	1	0	0	0	1	0	0
2	1	3	4	1	1	1	1	9	1	5	3	0	1	0	0	0	0	0	1	1	2	1	0	0	0	1	0	0	0	1	1	0	0	0	0	0	0	1	1	0	1	0	0	0	1	0	1	1	0
1	1	2	1	2	1	3	1	2	3	5	4	3	1	0	2	0	0	0	1	2	1	0	1	0	0	1	0	0	1	1	0	0	0	0	0	0	1	1	1	0	0	0	1	0	0	0	0	0	0
2	3	3	1	3	1	4	1	3	4	5	4	1	0	0	0	0	0	0	4	1	1	0	1	0	0	1	1	0	0	1	1	0	0	0	1	0	0	1	0	0	1	0	0	0	0	0	0	1	0
2	2	3	1	2	1	3	1	9	3	5	4	0	1	0	0	0	0	0	1	1	1	0	1	0	0	1	0	0	0	0	1	0	0	0	0	0	0	1	0	1	0	0	0	1	0	0	1	0	0
1	3	3	1	2	1	4	1	3	4	5	4	2	0	0	0	0	0	0	3	1	2	1	0	0	0	1	0	0	1	0	0	0	0	0	1	0	0	0	0	0	1	0	0	0	0	0	0	1	0
2	2	2	1	2	1	3	1	2	3	4	4	2	2	0	0	0	0	0	1	2	2	0	1	0	0	1	0	0	0	1	0	0	0	0	0	0	1	1	1	0	0	0	0	0	0	0	0	0	0
2	2	2	1	1	1	3	1	2	3	4	4	1	0	0	0	0	0	0	1	1	1	0	1	0	0	1	0	0	0	1	0	0	0	0	0	0	0	1	1	0	0	0	1	0	0	0	1	1	0
2	2	2	1	2	1	3	1	2	2	5	4	1	0	0	0	0	0	0	1	1	1	0	1	0	0	1	0	0	0	1	0	0	0	0	0	0	0	1	1	0	1	1	0	1	0	0	1	1	0
1	3	3	1	2	1	4	1	2	4	5	4	1	0	0	0	0	0	0	1	1	1	0	1	0	0	1	0	0	1	0	0	0	0	0	0	0	0	0	1	0	0	1	0	0	0	0	0	1	0
2	2	2	4	1	1	2	1	3	2	4	4	1	0	0	0	0	0	0	4	2	1	0	1	0	0	1	0	0	0	0	1	0	0	0	1	0	0	1	0	0	1	0	0	0	0	0	0	1	0
2	1	2	4	1	1	2	1	9	3	4	3	1	1	0	0	0	0	0	5	1	1	1	0	0	0	1	1	0	0	1	0	0	0	0	0	0	0	0	1	1	0	0	0	1	0	0	0	1	0
1	3	2	1	3	1	3	1	9	5	5	4	2	0	0	0	0	0	0	1	1	1	0	1	0	0	0	1	0	0	1	0	0	0	0	0	0	0	0	0	1	0	0	0	0	0	0	1	1	0
1	3	2	1	2	1	3	1	9	2	4	4	1	0	0	0	0	0	0	1	1	1	0	1	0	0	1	0	0	0	1	0	0	0	0	0	0	0	1	0	0	1	0	0	0	0	0	0	1	0
1	3	3	1	3	1	4	1	3	4	5	4	1	0	0	0	0	0	0	3	1	2	1	0	0	0	1	0	0	1	0	0	0	0	0	0	0	0	1	1	0	1	1	0	0	0	0	0	1	0
2	2	2	4	1	2	2	1	9	2	5	1	3	1	0	0	0	0	0	1	2	1	0	1	0	0	1	0	0	0	1	0	0	0	0	0	0	1	0	1	1	0	0	0	0	0	0	1	0	0
2	2	2	1	2	1	3	1	9	4	5	2	3	2	0	0	0	0	0	1	2	2	0	1	0	0	0	1	0	0	1	0	0	0	0	0	0	0	0	1	1	0	0	0	0	0	0	0	0	0
1	2	3	4	2	1	3	1	9	3	5	4	1	0	0	0	0	0	0	3	1	2	1	1	0	0	1	1	0	1	0	0	0	0	0	0	0	0	0	1	1	0	1	1	0	0	0	0	1	0
1	2	2	1	2	1	3	1	3	3	5	2	2	0	0	0	0	0	0	1	2	2	0	1	0	0	1	0	0	0	1	0	0	0	0	0	0	1	0	0	1	0	0	0	0	0	0	0	1	0
2	1	1	4	1	2	1	2	6	2	5	4	3	1	0	0	0	0	0	4	1	2	0	1	1	0	1	1	0	0	1	0	1	0	0	0	0	0	1	1	1	1	1	1	1	1	0	0	1	0
2	1	2	4	1	1	1	2	6	2	5	4	2	0	0	0	0	0	0	4	1	1	0	1	0	0	1	1	0	1	1	0	0	0	0	0	0	0	0	0	0	1	0	0	1	0	0	1	1	0
1	6	3	1	3	1	4	1	3	4	5	4	1	0	0	0	0	0	0	3	1	2	0	1	0	0	1	1	1	0	1	0	0	0	0	1	0	0	0	0	0	1	0	0	0	0	0	0	1	0
2	1	2	4	1	1	2	2	6	3	3	3	3	2	0	0	0	0	0	2	1	1	1	1	1	0	1	1	0	1	1	0	0	0	0	0	0	0	1	0	1	1	1	1	1	0	0	1	0	0
2	1	1	1	1	1	2	2	6	3	5	2	3	3	0	2	1	0	0	2	1	1	1	1	1	0	1	0	0	1	1	1	0	0	1	0	0	0	1	1	1	1	1	1	1	0	0	0	1	0
2	2	2	1	3	1	3	1	4	3	5	4	2	2	0	0	0	0	0	2	1	1	1	1	1	0	1	1	0	1	1	1	0	0	1	1	0	0	1	1	1	1	1	1	0	1	0	1	0	0
1	2	2	1	2	1	3	1	3	3	5	4	1	1	0	0	0	0	0	1	2	1	0	1	0	0	0	1	0	1	1	1	0	0	1	1	0	0	1	0	0	0	1	0	1	0	0	1	0	0
1	1	2	4	1	1	2	1	1	2	4	3	1	1	0	0	0	0	0	2	2	2	0	1	0	0	1	0	0	0	1	1	0	0	0	1	0	0	1	0	0	1	1	0	0	0	0	1	0	0
2	1	2	4	1	1	2	1	2	2	4	4	1	0	0	0	0	0	0	2	2	2	0	1	0	0	1	1	0	1	1	0	0	0	0	0	0	0	1	1	1	0	0	1	0	0	0	0	0	0
1	2	2	1	3	1	4	1	6	4	5	3	1	1	0	0	0	0	0	7	1	2	0	1	0	0	0	1	0	0	1	0	1	0	0	0	0	0	1	0	0	1	1	0	0	0	0	0	1	0
1	3	2	1	3	1	4	1	6	4	5	4	2	0	0	0	0	0	0	2	1	2	0	1	0	0	1	0	0	0	0	0	1	0	0	0	0	0	1	0	1	1	0	1	1	0	0	1	1	0
1	2	2	4	1	2	4	1	6	2	5	2	2	0	0	1	0	0	0	4	1	2	0	1	0	0	1	0	0	1	0	0	0	0	0	0	0	0	1	0	1	1	0	0	1	0	0	1	1	0
2	1	2	4	1	1	2	3	1	3	5	4	1	0	0	0	0	0	0	5	2	1	0	1	0	0	0	1	0	0	1	1	0	0	0	1	0	0	1	0	0	1	1	0	0	0	0	0	1	0
2	2	2	4	1	2	2	2	4	4	5	4	3	3	0	0	0	0	0	4	1	2	0	1	0	0	1	0	0	1	0	1	0	0	0	0	0	0	0	0	1	1	0	0	0	1	0	1	1	0
2	2	2	1	2	1	2	2	9	3	5	2	3	2	0	0	0	0	0	4	2	2	0	1	0	0	1	0	0	1	0	0	0	0	1	0	0	0	0	0	0	0	0	0	1	0	0	1	1	0
2	2	2	4	1	2	2	2	2	3	4	4	1	1	0	0	0	0	0	2	2	2	0	1	0	0	1	0	0	1	0	0	0	0	1	0	0	0	0	0	0	1	0	0	0	1	0	0	0	0
2	1	2	4	1	1	1	1	6	2	5	3	2	0	0	0	0	0	0	2	1	2	1	1	0	0	1	1	0	1	1	0	0	0	0	0	0	0	0	0	0	1	0	1	1	0	0	1	1	0
2	2	2	1	2	2	3	1	9	3	5	4	2	2	0	0	0	0	0	2	2	1	1	1	0	0	0	1	0	1	1	1	0	0	1	1	0	0	1	0	1	1	1	0	0	0	0	1	1	0
2	2	2	1	2	1	3	2	9	4	5	4	1	0	0	0	0	0	0	1	1	2	0	1	0	0	1	0	0	0	1	0	0	0	0	0	0	0	0	0	1	0	0	0	0	0	0	0	0	0
2	1	2	4	1	2	1	2	4	2	5	4	3	2	0	0	0	0	0	1	1	2	0	1	0	0	1	0	0	1	1	1	0	0	1	1	0	0	1	0	0	1	1	0	0	0	0	0	1	0
2	1	2	4	1	1	2	2	9	2	4	4	3	0	0	0	0	0	0	3	1	2	0	1	0	0	1	0	0	0	1	0	0	0	0	0	0	0	0	0	0	0	1	0	0	0	0	1	1	0
2	2	2	1	1	2	2	2	9	4	4	4	3	1	2	0	0	0	0	2	1	2	0	0	0	1	1	0	0	0	0	1	0	0	0	0	1	0	0	0	1	0	0	0	0	0	0	0	1	0
2	2	2	1	2	2	3	1	1	3	4	4	2	0	0	0	0	0	0	2	2	2	0	1	0	0	0	1	0	1	0	0	0	0	0	0	0	0	0	0	1	0	0	0	0	0	0	1	1	0
1	2	2	1	1	2	3	1	6	3	5	2	3	3	0	0	0	0	0	1	1	2	0	1	0	0	1	1	0	0	1	0	0	0	0	0	0	0	0	1	1	1	1	1	1	1	0	1	1	0
2	1	2	4	1	1	3	1	6	2	5	2	3	0	0	0	0	0	0	4	1	2	0	1	0	0	1	1	1	1	1	1	1	0	0	0	0	0	1	1	1	1	0	1	1	0	0	1	1	0
2	1	2	4	2	1	2	2	3	2	4	4	1	0	0	0	0	0	0	4	1	2	0	1	0	0	0	1	0	0	1	0	0	0	0	1	0	0	0	0	0	1	0	0	0	0	0	0	1	0
1	3	3	1	3	1	3	3	9	5	4	2	2	1	0	0	0	0	0	7	1	1	0	1	0	0	1	0	0	1	0	0	0	0	0	0	0	0	0	0	1	0	0	0	0	0	0	0	1	0
2	2	3	1	1	1	3	1	6	3	5	4	2	1	0	0	0	0	0	4	1	2	0	1	0	0	1	1	0	1	1	0	0	0	0	1	0	0	0	0	0	1	0	0	1	1	0	0	0	0
2	2	2	1	2	1	2	2	2	3	4	4	1	0	0	0	0	0	0	2	1	1	0	1	0	0	0	1	0	1	0	0	0	0	0	0	0	0	1	0	0	0	0	0	0	0	0	0	0	0
2	2	1	1	1	2	2	2	2	3	4	4	2	2	0	0	0	0	0	2	1	2	0	1	1	0	1	1	0	1	1	0	0	0	0	0	0	1	1	1	1	1	0	1	1	0	0	1	0	0
2	2	2	1	2	1	3	2	10	3	5	4	3	0	0	0	0	0	0	3	1	2	0	1	0	0	1	0	0	1	0	0	0	0	0	0	0	0	0	0	0	1	0	0	0	0	0	0	0	0
2	1	2	4	1	2	1	2	2	1	5	4	1	0	0	0	0	0	0	2	1	1	0	1	0	0	0	1	0	0	1	0	0	0	0	0	0	0	1	1	1	1	0	0	1	0	0	0	1	0
2	1	2	4	1	1	1	2	2	1	4	4	1	0	0	0	0	0	0	2	2	1	0	1	0	0	1	1	0	0	0	1	0	0	0	0	0	0	1	0	0	1	0	0	0	0	0	0	1	0
2	1	2	4	1	1	2	2	2	3	5	4	1	0	0	0	0	0	0	2	1	2	0	1	0	0	1	1	0	0	1	0	0	0	0	0	0	0	1	0	0	1	1	0	0	1	0	0	1	0
2	1	1	4	1	2	1	2	9	2	4	3	2	2	0	0	0	0	0	4	2	1	0	1	0	0	1	0	0	0	1	1	0	0	0	1	0	0	0	0	0	1	1	0	0	0	0	1	0	0
2	1	1	4	1	2	2	2	2	3	5	2	1	0	0	0	0	0	0	2	2	2	0	1	0	0	1	0	0	1	0	0	0	0	0	0	0	0	1	1	0	1	0	1	1	0	0	1	0	0
2	1	1	1	2	2	1	2	2	3	5	3	3	3	0	0	0	0	0	3	2	2	0	1	0	0	1	0	0	0	0	1	0	0	0	0	0	0	1	1	0	0	0	0	0	0	0	1	1	0
2	2	1	1	1	2	2	2	2	4	5	4	2	2	0	0	0	0	0	2	1	2	0	1	0	0	1	0	0	0	1	1	1	0	0	0	0	0	1	0	0	1	1	0	0	0	0	1	1	0
2	1	2	1	1	1	2	1	2	3	4	4	3	3	0	0	0	0	0	2	1	2	0	1	0	0	1	0	0	1	1	0	0	0	0	1	0	0	0	0	1	1	0	0	0	0	0	0	1	0
2	3	1	1	2	1	2	2	3	5	5	3	3	0	0	0	0	0	0	7	1	2	0	1	1	0	1	1	0	1	1	1	1	1	0	0	0	0	1	0	1	1	0	0	0	0	0	0	0	0
2	2	2	1	2	1	2	2	3	5	5	4	3	0	0	0	0	0	0	7	1	2	0	0	1	0	1	1	0	0	1	1	0	0	0	0	0	0	1	1	0	0	0	1	1	0	0	0	1	0
2	1	2	4	1	1	2	2	3	2	5	4	2	0	0	0	0	0	0	2	1	1	0	1	0	0	0	1	0	0	0	0	1	0	0	0	0	0	1	0	0	1	1	0	0	0	0	0	1	0
1	3	3	1	3	1	4	1	3	2	5	4	3	3	0	0	0	0	0	1	1	2	0	1	0	0	1	0	0	1	1	1	0	0	1	0	0	0	1	1	0	1	0	0	0	0	0	1	1	0
2	1	2	4	1	1	2	2	3	2	3	4	1	0	0	0	0	0	0	4	2	2	0	1	0	0	0	1	0	1	0	0	0	0	0	0	0	0	0	0	0	1	0	0	0	0	0	0	1	0
2	1	1	1	1	1	2	2	9	3	4	4	0	0	0	0	1	0	0	2	1	2	0	1	0	0	1	1	0	0	1	0	0	0	0	0	1	0	1	0	0	1	1	0	0	0	0	0	1	0
2	2	2	1	1	1	3	2	9	4	4	4	1	0	0	0	0	0	0	1	1	2	0	0	0	1	1	0	0	0	1	1	0	0	0	0	0	0	0	0	0	0	0	0	0	0	1	0	1	0
2	6	2	1	3	1	4	1	3	5	5	4	3	0	0	0	0	0	0	1	1	2	0	1	0	0	0	1	0	0	1	0	0	0	0	0	0	0	0	1	1	0	0	0	0	0	0	1	0	0
2	3	1	1	1	1	2	2	4	5	5	4	3	3	0	0	0	0	0	1	2	1	0	1	0	0	1	1	0	0	1	0	0	0	0	0	0	0	1	1	1	1	0	0	0	0	0	1	0	0
2	3	3	1	3	1	3	1	4	4	5	4	2	2	0	0	0	0	0	1	2	1	0	1	0	0	1	0	0	1	0	0	0	0	0	0	0	0	0	0	1	0	0	0	0	0	0	0	0	0
2	6	1	1	2	1	2	2	9	5	5	4	3	3	0	0	0	0	0	2	1	2	0	1	0	0	1	0	0	0	0	1	0	0	0	0	0	0	1	0	1	0	1	1	1	0	1	1	1	0
2	1	1	4	2	1	3	2	2	3	5	4	1	0	0	0	0	0	0	2	1	1	0	1	0	0	1	0	0	1	0	0	0	0	0	0	0	0	1	1	1	0	0	1	1	0	0	0	1	0
2	1	3	4	1	2	1	1	9	2	5	1	1	0	0	0	0	0	0	2	2	1	0	0	1	0	1	0	0	0	0	1	0	0	0	0	0	0	0	0	0	0	0	0	0	0	1	0	0	0
2	1	3	4	1	2	1	1	2	2	5	4	1	0	0	0	0	0	0	2	2	2	0	1	0	0	0	1	0	0	1	0	0	0	0	0	0	0	0	0	1	0	1	0	0	0	0	1	1	0
2	2	1	1	1	1	3	2	2	4	5	4	2	1	0	0	0	0	0	2	2	2	0	1	0	0	1	0	0	0	1	0	0	0	0	0	0	0	1	1	1	0	0	1	1	0	0	1	1	0
2	2	2	4	1	1	2	2	2	4	5	4	3	0	0	0	0	0	0	5	1	2	0	1	0	0	0	1	0	1	1	1	0	0	0	0	0	0	1	0	1	0	0	0	0	0	0	0	1	0
2	6	1	4	2	1	3	2	2	5	5	4	3	2	0	0	0	0	0	2	1	2	0	1	0	0	1	1	0	1	1	1	1	1	0	0	0	0	1	1	1	1	1	1	1	0	0	1	1	0
2	2	3	1	2	1	3	1	2	4	5	4	3	1	0	0	0	0	0	1	1	2	0	1	0	0	1	1	0	1	1	1	0	0	0	0	0	0	1	1	1	0	0	1	1	0	0	0	1	0
2	1	3	4	1	1	3	1	2	2	5	4	2	0	0	0	0	0	0	3	3	2	0	1	0	0	0	1	0	0	0	1	0	0	0	0	0	0	1	0	1	0	0	0	0	0	0	0	1	0
2	2	3	1	1	1	3	1	2	2	5	4	3	3	0	0	0	0	0	2	1	2	0	1	0	0	1	1	0	0	1	1	0	0	0	0	0	0	1	0	1	0	1	0	0	0	0	1	1	0
2	2	2	1	1	1	3	2	2	3	5	4	1	0	0	0	0	0	0	2	1	2	0	1	0	0	0	1	0	0	1	0	0	0	0	0	0	0	0	0	0	0	0	0	0	0	1	0	1	0
2	3	2	1	2	1	3	2	2	5	5	4	3	3	0	0	0	0	0	2	3	1	0	1	1	0	0	1	0	1	1	1	0	0	0	0	0	1	1	1	1	1	1	1	1	0	0	0	0	0
2	1	1	4	1	2	2	2	2	2	4	4	3	3	0	2	1	0	0	2	1	2	1	1	1	0	1	1	1	1	1	1	0	0	0	0	0	0	1	0	1	1	0	1	1	1	0	0	0	0
2	1	1	4	1	1	3	2	2	2	4	4	3	3	0	2	0	0	0	2	1	1	0	0	1	0	0	1	0	0	0	1	0	0	0	0	0	0	1	0	1	0	0	1	1	1	0	0	1	0
2	6	2	1	3	1	3	1	2	5	5	4	3	2	0	0	0	0	0	1	2	2	0	1	1	0	1	1	0	1	1	0	0	0	0	0	0	1	1	1	1	1	1	1	1	0	0	1	1	0
2	3	3	1	3	1	3	1	2	5	5	4	3	2	0	0	0	0	0	1	1	1	0	1	0	0	1	0	0	1	0	0	0	0	0	0	0	0	0	0	1	0	0	0	0	0	0	0	1	0
1	2	2	1	2	2	3	1	6	1	5	1	1	0	0	0	0	0	0	1	1	2	0	1	0	0	1	0	0	0	1	0	0	0	0	0	0	0	0	0	0	0	0	1	0	0	0	1	0	0
1	2	3	1	2	1	4	1	3	3	5	4	1	0	0	0	0	0	0	1	2	1	0	1	0	0	0	1	0	0	1	0	0	0	0	0	0	0	0	1	1	0	0	0	0	0	0	0	0	0
1	2	2	1	2	1	4	1	3	3	4	4	2	0	0	0	0	0	0	1	2	1	0	1	0	0	1	1	0	0	1	0	0	0	0	0	0	0	0	0	0	0	1	0	0	0	0	0	0	0
2	1	2	4	1	1	2	2	3	3	5	4	1	0	0	0	0	0	0	2	1	2	0	1	0	0	0	1	0	0	0	0	1	0	0	0	0	0	0	0	0	0	0	1	0	0	0	0	0	0
2	2	2	1	1	1	3	2	3	4	5	4	1	0	0	0	0	0	0	4	2	2	0	1	0	0	0	1	0	0	1	0	1	0	0	0	0	0	1	0	1	0	0	0	0	0	0	1	1	0
2	3	3	1	3	1	3	1	2	3	5	2	1	0	0	0	0	0	0	1	1	2	0	1	0	0	1	0	0	1	0	0	0	0	0	0	0	0	1	1	0	0	0	0	0	0	1	1	0	0
1	2	2	1	2	1	3	1	1	3	5	4	1	1	0	1	1	0	0	1	1	1	0	1	0	0	0	1	0	1	0	0	0	0	0	0	0	0	0	0	1	0	0	1	0	0	0	0	1	0
1	1	3	4	1	1	2	1	3	2	5	4	3	2	0	1	0	0	0	5	2	2	0	1	0	0	1	1	0	1	1	1	0	0	0	1	0	0	1	1	1	1	0	1	1	0	0	1	0	0
2	3	3	4	2	1	4	1	3	4	5	4	3	1	0	0	0	0	0	7	2	1	0	1	1	0	1	0	0	0	1	1	0	0	0	0	0	0	0	0	1	0	0	0	0	0	1	1	0	0
2	1	2	4	1	1	3	2	3	3	5	4	3	2	0	1	0	0	0	2	1	2	0	1	0	0	0	1	0	0	1	0	0	0	0	0	0	0	0	0	0	0	0	1	0	0	0	0	0	0
2	3	2	1	1	1	4	1	9	3	5	3	0	2	0	0	0	0	0	1	2	2	0	1	0	0	1	1	0	1	1	0	0	0	0	0	0	0	0	1	0	0	0	1	0	0	0	0	0	0
2	2	3	4	2	1	4	1	9	3	4	3	0	2	0	0	0	0	0	1	1	2	0	1	0	0	1	1	0	0	1	1	0	0	0	0	0	0	0	1	0	0	0	0	0	0	0	0	0	0
1	3	2	1	2	1	4	1	9	4	5	3	2	0	0	0	0	0	0	1	1	2	0	1	0	0	1	1	0	1	1	1	0	0	0	0	0	0	0	1	1	0	0	0	0	0	0	0	0	0
2	3	3	1	2	1	4	1	9	4	5	3	2	0	0	0	0	0	0	1	1	2	0	1	0	0	1	1	0	0	1	1	0	0	0	0	0	0	0	1	1	0	0	0	0	0	0	0	0	0
2	3	2	1	1	1	4	1	9	3	5	4	2	0	0	0	0	0	0	1	2	2	0	1	0	0	1	1	0	1	1	0	0	0	0	0	0	0	0	1	1	0	0	0	0	0	0	0	0	0
2	3	3	1	1	1	4	1	9	4	5	3	2	0	0	0	0	0	0	1	2	2	0	1	0	0	1	1	0	1	1	1	0	0	0	0	0	0	0	1	1	0	0	0	0	0	0	0	0	0
1	2	2	1	2	1	3	1	9	4	5	4	3	3	0	2	1	0	0	1	1	2	0	1	0	0	1	0	0	0	1	1	0	0	0	0	0	0	0	1	0	0	0	1	1	0	0	0	0	0
2	2	3	1	2	1	3	1	9	4	5	4	1	1	0	0	0	0	0	2	2	2	0	1	0	0	1	0	0	0	1	0	0	0	0	0	0	0	0	0	1	1	1	0	0	0	0	1	0	0
2	3	2	1	2	1	2	2	9	5	5	4	2	2	0	0	1	0	0	1	1	2	0	1	0	0	1	0	0	0	1	1	0	0	0	0	0	0	1	1	1	0	0	0	1	0	0	1	1	0
2	1	2	4	1	1	1	2	9	2	5	4	2	1	0	0	0	0	0	1	2	2	0	1	0	0	1	1	0	0	1	0	0	0	0	0	0	0	1	1	0	0	0	0	0	0	0	0	1	0
2	1	3	1	3	1	4	2	9	5	5	4	2	0	0	0	0	0	0	1	2	2	0	1	0	0	1	1	0	1	1	1	0	0	0	0	0	0	0	1	1	0	0	0	0	0	0	0	0	0
2	3	2	1	2	1	2	2	9	5	5	4	2	1	0	0	0	0	0	1	2	2	0	1	0	0	1	0	0	0	1	0	0	0	0	0	0	0	0	0	1	0	0	1	1	0	0	1	0	0
2	1	2	1	1	1	2	2	9	3	5	4	2	1	0	0	0	0	0	1	2	2	0	1	0	0	1	0	0	0	1	0	0	0	0	0	0	0	0	0	1	0	0	1	1	0	0	1	0	0
2	3	2	1	2	1	2	2	9	5	5	4	2	1	0	0	0	0	0	1	1	2	0	1	0	0	1	1	0	0	1	1	0	0	0	0	0	0	0	1	1	1	0	0	0	0	0	0	0	0
2	3	2	1	2	1	2	2	9	5	5	4	2	1	0	0	0	0	0	1	1	2	0	1	0	0	1	1	0	0	1	1	0	0	0	0	0	0	0	1	1	0	0	1	1	0	0	0	0	0
2	3	2	1	2	1	2	2	9	5	5	4	2	2	0	0	0	0	0	1	1	2	0	1	0	0	1	1	0	0	1	1	0	0	0	0	0	0	0	1	1	0	1	1	0	0	0	0	0	0
2	3	2	1	1	1	2	2	9	5	5	4	3	0	0	0	0	0	0	1	1	2	0	1	0	0	1	1	0	1	1	1	0	0	0	0	0	0	1	0	1	0	0	1	0	0	0	1	1	0
2	2	1	1	2	1	2	2	9	3	5	3	2	0	0	0	0	0	0	1	2	2	0	1	0	0	1	1	0	1	1	1	0	0	0	0	0	0	0	1	1	0	0	0	0	0	0	0	0	0
2	2	2	1	2	1	3	2	2	4	4	4	3	0	0	0	0	0	0	2	1	2	0	1	0	0	0	1	0	0	1	0	0	0	0	0	0	0	0	0	0	0	0	0	0	0	1	0	0	0
2	2	2	1	2	1	3	2	2	4	5	2	2	1	0	0	0	0	0	2	1	2	0	1	0	0	0	1	0	0	1	0	0	1	0	0	0	0	1	0	1	0	0	0	0	0	0	1	1	0
2	2	2	1	2	1	3	1	2	4	4	4	3	3	0	0	0	0	0	2	1	2	0	1	0	0	1	0	0	0	0	0	1	0	0	0	0	0	0	0	1	0	0	0	0	0	0	1	0	0
2	1	3	1	1	1	3	1	2	2	5	4	3	2	0	0	0	0	0	1	2	1	0	1	0	0	1	1	0	1	1	0	0	0	0	0	0	0	1	1	1	1	0	0	0	0	0	1	1	0
2	1	2	4	1	1	3	2	2	3	5	4	2	2	0	1	0	0	0	2	2	1	0	1	1	0	1	0	0	0	1	0	0	0	0	0	0	0	1	0	1	1	0	1	1	0	0	1	1	0
2	3	2	1	1	1	3	2	2	5	5	4	2	0	0	0	0	0	0	2	1	2	0	1	1	0	1	1	0	1	1	0	1	0	0	0	0	1	0	0	0	0	0	0	0	0	1	1	1	0
2	2	1	1	2	1	3	2	3	4	5	4	3	3	0	0	0	0	0	2	1	2	0	1	1	0	1	1	0	1	1	1	1	1	1	1	0	0	0	1	1	1	1	1	1	1	0	1	1	0
2	1	1	4	1	1	3	2	3	3	5	4	3	3	0	0	0	0	0	2	1	1	0	1	1	0	1	1	0	1	1	1	0	0	1	1	0	0	1	1	1	1	1	1	1	0	0	1	1	0
1	6	2	1	3	1	4	1	3	5	5	4	3	3	0	3	0	0	0	1	1	2	0	1	0	0	1	1	1	1	1	0	1	0	0	0	0	0	0	0	0	1	1	0	1	1	0	0	0	0
1	2	3	1	1	1	4	1	3	3	5	4	1	0	0	0	0	0	0	1	2	1	0	1	0	0	1	0	0	1	0	0	0	0	0	0	0	0	1	0	0	0	0	0	0	0	0	1	0	0
1	2	3	1	2	1	2	1	3	3	4	3	3	2	0	1	1	0	0	1	2	2	0	1	0	0	1	1	0	1	1	0	0	0	0	0	0	0	0	0	0	0	0	0	0	0	1	0	0	0
2	6	1	1	2	1	3	2	3	5	5	4	2	1	0	0	0	0	0	2	1	2	0	1	1	0	1	1	0	1	1	1	1	1	0	0	0	0	1	0	0	0	0	0	0	0	1	0	0	0
2	1	2	4	2	1	2	2	9	3	5	4	3	0	0	0	0	0	0	7	1	2	0	1	1	0	1	1	0	0	1	0	0	0	0	0	0	0	1	1	0	0	0	1	0	0	0	1	0	0
2	2	2	1	1	1	3	2	9	3	5	4	2	2	0	0	0	0	0	1	1	2	0	1	0	0	1	1	0	1	1	1	1	1	0	0	0	0	0	1	1	0	1	1	0	0	0	1	0	0
2	2	2	1	2	1	3	2	9	4	5	4	3	3	0	0	0	0	0	2	1	2	0	1	0	0	0	1	0	0	1	0	1	0	0	0	0	0	0	1	1	0	0	0	0	0	0	1	0	0
2	1	2	4	1	1	2	2	9	3	5	4	2	1	0	0	0	0	0	2	2	2	0	1	1	0	1	1	0	1	0	0	0	0	0	0	0	0	0	1	1	1	0	1	1	0	0	1	1	0
2	1	2	4	1	1	2	2	9	2	5	4	2	1	0	0	0	0	0	2	1	2	0	1	0	0	1	1	0	1	1	1	1	1	0	0	1	0	1	1	1	0	0	1	0	0	0	0	1	0
2	1	1	4	1	1	2	2	9	2	4	4	2	2	0	0	0	0	0	2	1	1	0	1	0	0	0	1	0	1	0	0	0	0	0	0	0	0	1	0	1	0	0	0	0	0	0	1	0	0
2	1	1	4	1	2	2	2	9	2	3	1	1	0	0	0	0	0	0	1	1	2	0	1	1	0	1	1	0	1	0	0	0	0	1	0	1	1	1	1	1	1	0	1	1	0	0	1	1	0
2	3	1	1	1	1	2	2	9	5	5	4	3	2	0	0	0	0	0	1	1	2	1	1	0	0	1	1	0	1	1	0	0	0	0	0	0	0	1	0	1	0	0	0	0	0	0	1	0	0
2	3	3	1	3	1	2	1	9	4	5	4	1	0	0	0	0	0	0	1	1	1	0	1	0	0	1	0	0	1	0	0	0	0	0	0	0	0	0	0	1	0	0	0	0	0	0	1	1	0
2	2	3	1	2	1	3	1	9	3	5	4	3	3	0	0	0	0	0	1	2	2	0	1	0	0	1	0	0	1	0	0	0	0	1	1	0	1	1	1	1	0	0	1	1	1	0	1	0	0
2	3	3	1	3	1	3	1	9	2	5	4	2	2	0	0	0	0	0	1	1	1	0	1	0	0	1	1	0	1	1	0	0	0	0	0	0	0	1	1	1	0	0	1	1	0	1	1	0	0
2	2	3	1	2	1	4	1	9	3	5	4	2	0	0	0	0	0	0	1	1	2	0	1	0	0	0	1	0	0	1	0	0	0	0	0	0	0	0	0	1	0	0	0	0	0	0	1	0	0
2	3	3	1	3	1	4	1	9	4	5	4	3	2	0	0	0	0	0	1	1	2	1	1	0	0	1	1	0	1	1	0	0	0	0	0	0	0	0	0	1	0	0	1	0	0	0	1	0	0
2	2	3	1	2	1	4	1	9	3	5	4	3	3	0	0	0	0	0	1	1	2	0	1	1	0	1	1	0	1	1	1	1	1	0	0	0	0	0	1	1	1	0	1	1	0	0	1	1	0
2	2	3	1	2	1	4	1	9	3	5	4	3	2	0	0	0	0	0	1	2	2	0	1	0	0	1	0	0	1	0	0	0	0	0	0	0	1	0	0	1	0	0	1	0	0	0	1	0	0
2	2	3	1	3	1	3	1	9	3	5	4	3	3	0	0	1	0	0	1	1	2	0	1	0	0	1	0	0	1	0	0	0	0	0	0	0	0	0	0	0	0	0	0	1	0	0	1	0	0
2	3	2	1	1	1	3	3	9	4	4	4	2	2	0	0	0	0	0	5	1	2	0	1	0	0	1	1	0	0	1	0	0	0	0	0	0	0	0	0	1	1	0	1	0	0	0	1	0	0
1	2	3	1	3	1	3	1	9	4	4	4	3	2	0	1	0	0	0	1	1	1	0	1	0	0	1	1	0	1	1	0	0	0	0	0	0	1	1	0	0	0	0	0	0	0	0	1	1	0
1	1	3	4	1	1	3	1	2	2	4	4	2	0	0	0	0	0	0	3	1	2	0	1	0	0	1	1	0	0	0	1	0	0	0	0	0	0	0	0	0	1	0	1	1	1	0	1	0	0
2	2	2	1	2	1	2	2	2	4	5	4	3	3	0	0	0	0	0	2	2	1	0	1	0	0	0	1	0	0	1	0	0	0	0	0	0	0	1	0	1	1	0	1	1	0	1	1	0	0
2	2	2	1	1	1	2	2	2	4	5	4	3	3	0	3	0	0	0	2	2	2	0	1	1	0	1	1	0	0	1	1	1	0	0	0	0	0	1	1	1	0	0	1	1	0	0	1	0	0
2	1	3	4	1	1	2	1	2	2	5	4	3	3	0	0	0	0	0	2	2	2	0	1	0	0	1	1	0	0	1	0	1	0	0	0	0	0	1	0	1	1	1	1	1	0	0	1	0	0
2	3	1	1	1	1	3	2	3	5	4	4	2	2	0	0	0	0	0	2	1	2	0	1	0	0	1	0	1	1	1	1	0	0	0	0	0	0	1	0	1	1	0	1	1	1	0	0	1	0
1	1	2	1	2	1	3	1	3	3	5	3	3	3	0	0	0	0	0	1	2	1	0	1	0	0	1	1	0	0	1	0	0	0	0	0	0	0	0	1	0	0	0	1	1	0	0	0	0	0
2	3	2	1	2	1	2	2	3	5	5	4	3	3	0	0	0	0	0	2	1	2	0	1	0	0	1	0	0	1	0	0	1	0	0	0	0	1	0	1	1	0	0	1	0	0	0	1	0	0
2	2	1	1	1	1	3	2	3	4	5	4	3	2	0	1	1	0	0	4	2	2	0	1	0	0	1	1	0	0	1	1	0	0	0	0	0	1	1	0	0	0	0	1	0	0	0	1	0	0
2	1	3	4	1	1	3	1	1	2	4	4	1	0	0	0	0	0	0	3	1	2	0	1	0	0	1	0	0	1	0	0	0	0	0	0	0	0	0	0	1	0	0	0	0	0	0	1	0	0
1	3	3	1	3	1	3	1	3	4	5	4	2	1	0	0	0	0	0	1	1	1	0	1	0	0	1	0	0	0	1	0	0	0	0	0	0	0	0	0	1	0	0	1	0	0	0	0	1	0
1	2	3	1	2	1	4	1	3	4	5	4	3	2	0	0	0	0	0	1	1	1	0	1	0	0	1	1	0	1	1	1	1	1	0	0	0	1	1	1	1	0	1	1	1	1	1	1	1	1
1	3	2	1	2	1	3	2	3	5	4	4	1	1	0	0	0	0	0	2	1	2	0	1	0	0	0	1	0	0	1	0	0	0	0	0	0	0	0	0	0	0	0	1	0	0	0	0	1	0
1	2	3	1	2	1	3	1	3	3	5	3	1	1	0	0	0	0	0	2	1	2	0	1	0	0	1	0	0	1	0	0	0	0	0	0	0	0	0	0	0	1	0	0	0	0	0	0	1	0
1	2	3	1	2	1	2	1	3	3	5	4	2	1	1	0	0	0	0	3	2	1	0	1	0	0	0	1	0	1	0	0	0	0	0	0	0	0	1	1	0	1	0	0	1	0	0	0	1	0
2	1	1	4	1	2	1	2	3	2	4	4	3	3	0	0	0	0	0	2	1	2	0	1	1	0	1	1	0	0	1	0	0	0	0	0	0	0	1	0	1	0	0	1	1	1	0	1	0	0
2	2	3	1	2	1	3	1	3	3	5	4	3	2	0	1	0	0	0	7	2	1	0	1	0	0	1	0	0	0	1	0	0	0	0	0	0	1	1	1	1	1	1	1	1	0	0	1	0	0
1	1	3	4	2	1	2	1	4	2	5	4	2	3	0	0	1	0	0	7	1	1	0	1	0	0	0	1	0	0	0	1	0	0	0	0	0	0	0	0	1	0	0	0	0	0	0	0	0	0
1	1	3	4	1	1	2	1	3	2	5	4	0	1	0	0	0	0	0	3	2	2	0	1	0	0	1	0	0	1	0	0	0	0	0	0	0	0	0	1	1	0	1	1	0	0	0	1	0	0
1	1	3	4	1	1	1	1	3	2	5	3	0	1	0	0	0	0	0	3	1	2	0	1	0	0	0	1	0	0	1	0	0	0	0	0	0	0	0	0	1	0	0	0	0	0	1	1	0	0
2	1	2	4	1	1	2	2	9	2	4	4	1	1	0	1	0	0	0	2	1	2	0	1	0	0	1	0	0	1	0	1	0	0	1	1	1	1	1	0	0	1	0	0	0	0	0	0	1	0
2	1	1	4	1	1	2	2	9	2	4	4	2	1	0	0	0	0	0	2	1	2	0	1	0	0	1	0	0	1	0	0	0	0	0	0	0	0	1	1	1	0	1	1	0	0	0	1	0	0
2	1	1	4	1	1	1	3	9	3	4	4	3	2	0	0	0	0	0	2	1	2	0	1	0	0	1	0	0	0	1	0	0	0	0	0	0	0	0	1	1	0	0	1	0	0	0	0	1	0
2	3	3	1	3	1	4	1	9	4	5	4	3	1	0	0	0	0	0	3	1	2	0	1	0	0	1	1	0	1	0	0	1	1	1	0	0	1	0	1	1	0	0	0	0	0	0	1	0	0
2	2	3	1	2	1	3	1	9	3	5	4	3	3	0	0	1	0	0	2	1	2	0	1	0	0	0	1	0	1	1	1	1	0	1	0	0	0	0	0	1	0	0	1	0	1	0	0	0	0
2	1	3	4	2	1	3	1	9	3	5	3	3	2	0	1	1	0	0	1	2	1	0	1	0	0	1	0	0	0	1	0	0	0	0	0	0	0	1	1	0	0	0	1	0	0	0	0	0	0
2	2	3	1	2	1	4	1	9	3	5	4	3	3	0	0	0	0	0	1	2	2	0	1	0	0	0	1	0	0	1	0	0	0	0	0	0	0	1	0	1	0	0	0	0	0	0	1	0	0
1	3	3	1	3	1	2	1	9	4	5	3	1	1	0	1	0	0	0	1	2	1	0	1	0	0	1	1	0	1	0	0	0	0	0	0	0	0	0	1	1	1	0	0	0	0	0	1	0	0
2	1	3	4	1	1	1	1	9	1	5	4	1	0	0	1	1	0	0	2	1	2	0	1	0	0	0	1	0	1	0	0	0	0	1	0	0	0	0	0	0	0	0	0	0	0	0	1	1	0
1	2	3	1	2	1	2	1	9	4	5	3	2	0	0	0	0	0	0	1	1	2	0	1	0	0	0	1	0	0	1	0	0	0	0	0	0	0	0	0	1	0	0	0	0	0	0	0	1	0
1	3	3	1	3	1	4	1	9	4	4	3	2	0	0	0	0	0	0	1	1	1	1	0	0	0	1	0	0	0	1	0	0	0	0	0	0	0	0	0	1	0	0	0	0	0	0	0	0	1
2	1	2	1	1	1	3	2	9	3	5	4	1	0	0	0	0	0	0	2	1	2	0	1	0	0	1	0	0	0	1	0	0	0	0	0	0	0	0	0	0	0	0	0	0	0	1	0	0	0
2	2	2	1	1	1	3	2	9	4	5	4	2	1	0	0	0	0	0	2	1	2	0	1	0	0	1	0	0	0	1	0	0	0	0	0	0	1	0	1	0	0	0	0	0	0	0	0	1	0
2	2	2	1	1	1	3	2	9	4	5	4	3	1	0	0	0	0	0	2	1	2	0	1	0	0	1	0	0	0	1	0	0	0	0	0	0	0	0	1	0	0	0	0	0	0	0	0	1	0
2	1	1	4	1	1	3	2	9	2	5	4	3	0	0	0	0	0	0	4	1	2	0	1	0	0	1	0	0	1	0	0	0	0	0	0	0	1	0	0	0	0	0	0	0	0	0	1	0	0
2	1	2	4	1	1	3	2	9	3	5	4	2	2	0	2	0	0	0	2	2	2	0	1	0	0	0	1	0	0	1	0	0	0	0	0	0	0	1	0	0	0	0	0	0	0	0	1	0	0
2	2	2	1	1	1	3	2	9	4	5	4	3	1	0	0	0	0	0	2	1	2	0	1	0	0	1	1	0	1	1	1	0	0	0	0	0	0	1	0	1	0	0	0	0	0	0	0	0	0
1	2	3	1	2	1	3	1	1	2	5	4	2	1	0	2	1	0	0	3	2	2	0	1	1	0	1	1	0	1	1	1	0	0	0	1	0	1	1	1	1	1	1	1	0	0	0	0	1	0
2	2	2	1	2	1	3	1	1	3	5	4	3	1	0	0	1	0	0	2	2	1	0	1	0	0	1	1	0	1	1	1	0	0	0	1	0	0	1	1	1	1	0	1	0	1	0	0	1	0
1	2	2	1	1	1	3	1	1	3	5	4	3	3	0	2	0	0	0	3	2	2	0	1	0	0	1	0	0	1	0	0	0	0	0	0	0	0	0	1	1	1	1	1	0	0	0	1	0	0
2	1	1	4	1	2	2	2	1	2	4	4	3	0	0	0	0	0	0	4	2	2	0	1	0	0	1	0	0	1	0	0	0	0	0	0	1	0	1	1	0	0	0	0	0	0	0	0	1	0
2	1	2	1	1	1	3	2	1	3	5	4	3	3	0	0	0	0	0	2	2	2	0	1	0	0	1	0	0	1	0	0	0	0	0	0	0	0	1	0	0	1	0	0	0	0	0	0	0	0
2	1	1	1	2	1	3	2	1	3	5	4	3	3	0	0	0	0	0	5	2	2	0	1	0	0	0	1	0	1	1	0	0	1	0	0	0	0	1	0	1	1	0	1	1	0	0	1	1	0
2	2	2	1	1	1	4	2	1	4	5	4	3	3	0	0	0	0	0	5	2	2	0	1	0	0	0	1	0	1	1	0	0	1	0	0	0	0	1	1	1	1	0	1	1	0	0	1	1	0
2	2	2	1	1	1	2	1	1	3	5	4	3	1	0	0	0	0	0	1	2	1	1	1	0	0	1	1	1	1	0	1	1	1	0	0	0	0	1	1	0	1	0	1	1	0	0	1	0	0
2	1	3	4	1	1	3	1	1	3	5	4	2	0	0	0	0	0	0	2	1	2	0	1	0	0	1	1	0	0	1	0	0	0	1	1	0	0	1	1	1	1	0	0	1	1	0	0	0	0
2	2	2	1	1	1	3	1	1	3	5	4	3	0	0	3	0	0	0	7	1	2	0	1	0	0	1	0	0	1	0	0	0	0	0	0	0	0	0	0	0	1	0	0	0	0	0	1	1	0
2	1	3	1	1	1	2	1	1	2	5	4	3	2	0	1	0	0	0	2	1	2	0	1	1	0	1	1	0	0	1	1	0	0	0	0	0	0	1	1	1	1	0	1	1	0	0	0	1	0
2	3	3	1	2	1	2	1	1	4	4	4	1	0	0	0	0	0	0	1	2	2	0	1	0	0	1	1	0	1	1	0	0	0	0	0	0	0	0	0	0	1	0	1	1	0	0	1	1	0
2	2	3	1	2	1	4	1	1	1	5	4	1	0	0	0	0	0	0	7	2	2	0	1	0	0	0	1	0	0	1	0	0	0	0	0	0	0	0	0	0	1	0	0	0	0	1	1	1	0
2	1	3	4	1	1	2	1	1	2	5	4	3	3	0	0	0	0	0	2	1	2	0	1	0	0	1	0	0	0	1	0	0	0	0	0	0	0	0	0	1	1	0	1	1	1	0	1	0	0
2	3	2	1	2	1	4	2	1	5	4	4	3	0	0	0	0	0	0	1	1	2	0	1	0	0	1	1	0	0	1	0	0	0	0	0	0	0	0	1	0	0	1	1	0	0	0	1	1	0
2	1	1	1	1	1	3	2	1	3	5	4	3	3	0	2	0	0	0	1	2	2	0	1	0	0	0	1	0	0	1	0	0	0	0	0	0	0	0	1	0	0	0	1	0	0	0	1	1	0
2	1	3	1	1	1	3	1	6	2	5	4	3	0	0	0	0	0	0	2	1	2	0	1	0	0	1	0	0	0	0	0	1	0	0	0	0	0	1	1	0	0	0	0	1	0	0	0	1	0
1	3	3	1	3	1	4	1	6	5	5	3	3	2	0	0	0	0	0	2	1	2	0	1	0	0	1	0	0	1	1	0	0	0	0	0	0	0	1	0	1	0	0	0	1	1	0	0	1	0
2	3	3	1	3	1	3	1	6	4	5	3	3	2	0	0	0	0	0	2	1	2	0	1	0	0	1	0	0	1	1	0	0	0	0	0	0	0	1	0	1	0	0	0	1	0	1	0	1	0
2	2	3	1	1	1	3	1	6	2	5	2	1	0	0	0	0	0	0	3	1	2	0	1	0	0	1	0	0	1	0	0	0	0	0	0	0	0	0	0	0	1	0	0	0	0	0	0	1	0
1	2	2	1	2	2	2	1	6	3	5	1	2	0	0	0	0	0	0	4	2	2	0	1	0	0	1	0	0	1	0	0	0	0	0	0	0	0	0	0	1	0	0	0	0	0	0	0	0	0
2	2	2	4	1	1	3	3	10	4	5	4	3	3	0	0	0	0	0	1	2	1	0	1	0	0	1	1	0	1	1	0	1	1	0	0	0	0	1	1	0	0	0	1	0	0	0	1	0	0
1	1	2	4	1	1	4	3	10	2	5	4	2	1	0	0	0	0	0	7	2	1	0	1	0	0	1	0	0	0	1	0	0	0	0	0	0	0	1	0	0	0	1	1	0	0	1	1	0	0
1	3	3	1	3	1	4	1	10	4	5	1	1	1	0	0	0	0	0	4	1	2	0	1	0	0	0	1	0	0	1	0	0	0	0	0	0	0	0	0	0	0	1	0	0	0	0	1	0	0
2	1	3	4	1	1	4	1	10	2	5	1	2	0	0	0	0	0	0	1	1	2	1	0	0	0	0	1	0	0	0	1	0	0	0	0	0	0	0	0	1	0	0	0	0	0	0	1	0	0
2	2	3	1	2	1	3	1	10	4	5	2	3	2	0	0	0	0	0	1	2	1	0	1	0	0	1	0	0	1	0	0	0	0	0	0	0	0	0	0	1	0	0	1	0	0	0	0	1	0
1	2	2	1	1	1	2	1	10	3	5	4	1	0	0	0	0	0	0	7	2	1	0	1	0	0	1	0	0	0	0	1	0	0	0	0	0	0	0	1	0	0	0	0	0	0	0	0	1	0
2	3	3	1	3	1	4	1	10	4	5	2	1	0	0	0	0	0	0	1	1	1	0	1	0	0	1	0	0	1	0	0	0	0	0	0	0	1	0	0	1	0	0	0	1	0	0	0	1	0
2	1	3	4	1	1	2	1	10	1	5	1	1	0	0	0	0	0	0	3	1	2	0	1	0	0	0	1	0	0	1	0	0	0	1	1	1	0	1	1	1	1	0	1	1	1	0	1	1	0
1	2	3	1	3	1	4	1	10	4	5	1	0	1	0	0	1	0	0	1	1	1	0	1	0	0	0	1	0	0	1	0	0	0	0	0	0	0	0	0	0	0	0	0	0	1	0	0	0	0
2	3	3	1	3	1	4	1	10	4	5	1	2	1	0	0	0	0	0	1	1	2	0	1	0	0	1	1	0	1	1	0	0	0	0	0	0	0	1	0	1	0	1	0	0	0	0	0	1	0
1	6	2	1	3	1	4	1	10	5	5	2	1	0	0	0	0	0	0	1	1	1	0	1	0	0	0	1	0	1	0	0	0	0	0	0	0	0	1	0	0	0	0	0	0	0	0	0	1	0
1	6	2	1	3	1	4	3	10	5	5	4	3	0	0	0	0	0	0	1	2	1	0	1	0	0	1	0	0	1	0	0	0	0	0	0	0	0	0	0	1	0	0	1	0	0	0	1	0	0
1	1	2	1	1	1	3	3	10	3	4	4	0	1	1	1	0	0	0	1	2	1	0	1	0	0	1	0	0	0	1	0	0	0	0	0	0	0	0	1	0	0	0	0	0	0	0	0	0	0
2	1	2	4	1	2	2	2	2	2	4	4	1	1	0	0	0	0	0	2	2	1	0	1	1	0	1	0	0	1	0	0	0	0	0	0	0	0	1	0	0	0	1	0	0	0	0	1	1	0
2	1	2	4	1	2	2	2	2	2	4	4	2	1	0	1	0	0	0	2	2	2	0	1	0	0	1	1	0	0	0	0	1	0	0	0	0	0	0	0	1	0	0	0	0	0	0	1	0	0
2	3	2	1	2	2	1	2	2	3	4	4	1	0	0	0	0	0	0	2	3	2	0	1	0	0	1	0	0	0	1	0	0	0	0	0	0	0	0	0	0	0	0	0	0	1	0	0	1	0
2	3	1	1	2	1	2	2	1	3	4	4	2	0	0	0	0	0	0	4	1	2	0	1	0	0	1	1	0	0	1	0	0	0	0	0	0	0	1	0	1	0	0	1	0	0	0	1	1	0
2	2	2	1	2	1	2	2	1	4	5	4	2	1	0	0	0	0	0	1	1	1	0	1	0	0	1	1	0	0	1	0	0	0	0	0	0	1	0	1	1	1	1	1	1	1	0	0	0	0
2	2	2	1	1	2	2	2	1	3	5	4	2	0	0	0	0	0	0	4	2	2	0	1	0	0	1	0	0	0	1	0	0	0	0	0	0	0	1	0	1	0	0	1	0	0	0	1	0	0
2	3	2	1	2	1	2	2	1	5	5	3	2	0	0	0	0	0	0	4	1	2	0	1	0	0	1	0	0	0	1	0	0	0	0	0	0	0	0	1	1	0	0	1	1	0	0	1	0	0
2	2	2	1	1	1	2	2	1	4	5	4	2	0	0	0	0	0	0	4	1	1	0	1	0	0	1	0	0	0	1	0	0	0	0	0	0	0	1	0	0	0	0	1	1	0	0	1	0	0
2	2	2	1	1	1	2	2	1	4	5	4	3	0	3	1	1	1	0	1	1	2	0	1	0	0	0	1	0	0	0	1	0	0	0	0	0	0	1	0	1	0	0	0	0	1	0	1	0	0
2	3	2	1	2	1	2	2	1	5	4	4	3	3	0	3	0	0	0	1	1	2	0	1	0	0	1	0	0	0	1	0	0	0	0	0	0	0	0	0	1	0	0	0	0	1	0	0	1	0
2	2	2	1	2	1	2	2	1	5	5	4	2	0	0	0	0	0	0	1	1	2	0	1	0	0	1	0	0	0	1	0	0	0	0	0	0	0	0	0	1	0	0	1	0	1	0	1	0	0
2	2	2	1	3	1	2	2	2	5	4	3	3	3	0	0	0	0	0	4	1	2	0	1	0	0	1	0	0	1	1	0	0	0	0	0	0	0	1	1	0	1	1	1	1	1	0	1	1	0
2	2	2	1	2	2	1	2	1	3	5	4	3	0	0	0	0	0	0	1	1	2	0	1	0	0	1	1	0	1	1	1	1	0	0	0	0	0	0	1	1	1	1	1	1	1	0	1	1	0
2	3	2	1	2	1	2	2	4	5	5	4	1	0	0	0	0	0	0	2	1	2	0	1	0	0	1	1	0	0	0	1	0	0	1	0	0	0	0	0	1	1	1	0	0	0	0	0	1	0
2	2	2	1	1	1	2	2	2	2	4	4	1	0	0	0	0	0	0	2	1	1	0	1	0	0	0	1	0	0	0	0	1	0	0	0	0	0	1	0	0	0	0	0	0	0	0	0	1	0
2	1	2	4	1	2	2	2	2	3	5	3	3	2	0	0	0	0	0	2	1	1	0	1	0	0	1	0	0	0	1	0	0	0	0	0	0	1	1	1	1	1	0	1	1	0	0	1	1	0
2	1	2	4	1	2	2	2	2	3	5	4	2	2	0	0	0	0	0	2	2	2	0	1	0	0	1	1	0	1	0	0	0	0	0	0	0	0	0	0	0	1	0	0	0	0	0	0	1	0
2	3	2	1	3	1	2	2	2	5	4	2	2	0	0	0	0	0	0	4	1	2	0	1	0	0	1	0	0	0	1	0	0	0	0	0	0	0	0	0	1	0	0	0	0	0	0	1	0	0
2	2	2	4	1	2	2	2	2	4	4	4	3	3	0	1	2	0	0	2	2	1	0	1	0	0	1	0	0	0	1	0	0	0	0	0	0	0	1	1	1	1	1	1	1	1	0	1	1	0
2	3	1	1	3	1	3	2	2	5	4	4	3	3	0	2	2	0	0	1	1	2	0	1	0	0	1	0	0	0	0	1	0	0	0	0	0	1	1	1	1	1	1	1	1	1	0	1	1	0
2	2	2	1	2	1	2	2	2	4	4	4	3	3	0	1	3	0	0	1	1	2	0	1	0	0	1	0	0	0	0	0	1	0	0	0	0	0	1	1	1	1	1	1	1	1	0	1	1	0
2	2	2	1	1	2	1	2	10	3	4	4	3	3	0	3	3	1	0	1	1	1	1	1	1	0	1	1	0	1	1	1	1	0	0	0	0	0	1	1	1	1	1	1	1	1	1	1	1	0
2	2	2	1	1	2	1	2	10	3	5	4	3	3	0	3	0	2	3	1	1	1	0	1	0	0	1	1	1	1	1	1	1	1	0	0	0	0	1	1	1	1	1	1	1	1	0	1	1	0
2	2	2	1	2	1	2	2	10	4	5	4	3	0	0	2	1	0	0	1	1	2	0	1	0	0	1	1	0	0	1	0	0	0	1	1	1	1	1	1	0	0	1	1	1	0	0	1	1	0
2	1	1	4	1	2	2	2	10	2	4	4	2	0	0	0	0	0	0	1	1	2	0	1	0	0	1	0	0	0	1	0	0	0	0	0	0	0	1	1	0	0	0	0	0	0	0	1	1	0
2	2	2	1	1	2	2	2	9	3	4	4	0	0	0	0	1	0	0	1	1	2	1	0	0	0	1	0	1	0	0	0	0	0	0	0	0	0	0	0	0	0	0	0	0	0	1	0	1	0
2	2	2	1	1	1	3	2	3	2	3	3	1	1	0	0	0	0	0	2	2	2	0	1	0	0	1	1	0	0	0	1	1	0	0	0	0	0	1	1	1	1	0	0	0	0	0	1	1	0
2	1	2	4	1	2	2	2	3	1	3	3	1	0	0	0	0	0	0	2	2	1	0	1	0	0	0	1	0	0	1	0	0	0	0	0	0	0	1	0	1	0	0	0	0	0	0	0	1	0
2	1	2	1	1	1	2	2	10	3	4	4	3	0	0	0	0	0	0	1	1	2	0	1	0	0	1	0	0	0	0	1	0	0	0	0	0	0	1	1	0	0	0	0	1	0	0	1	1	0
2	6	2	1	3	1	3	2	10	3	4	4	3	0	0	0	0	0	0	4	1	2	1	1	0	0	1	1	0	1	0	0	0	0	1	0	0	0	1	0	1	1	1	0	0	1	0	1	1	0
2	2	2	1	2	1	2	2	10	4	4	4	2	0	0	0	1	0	0	1	1	2	0	1	0	0	1	0	0	0	1	0	0	0	0	0	0	0	0	1	1	0	0	0	0	0	0	1	1	0
2	3	1	1	1	1	2	2	9	5	4	4	3	2	0	0	0	0	0	1	1	2	0	1	0	0	0	1	0	0	1	0	0	0	0	0	0	1	1	0	0	0	0	0	0	0	0	1	1	0
2	2	2	1	1	2	1	2	9	4	5	4	2	0	0	1	0	0	0	1	1	2	0	1	0	0	1	1	0	0	0	0	1	0	0	0	0	0	1	0	1	0	0	1	0	0	0	1	1	0
2	3	2	1	1	2	2	2	4	4	4	4	1	0	0	0	0	0	0	1	1	2	0	1	0	0	0	1	0	0	1	0	0	0	0	0	0	0	1	1	0	0	0	0	0	0	0	0	1	0
2	3	1	1	2	1	2	2	9	5	5	4	3	2	0	0	0	0	0	2	2	2	1	1	0	0	1	0	0	1	0	0	0	0	0	0	1	0	0	1	0	0	0	1	0	0	0	1	1	0
2	3	2	1	2	1	2	2	3	5	4	4	3	0	0	1	0	0	0	1	1	1	0	1	0	0	1	1	0	1	1	1	0	0	0	0	0	0	1	1	0	0	0	1	0	0	0	1	1	0
2	1	2	1	1	2	1	2	3	3	4	4	3	3	0	0	0	0	0	1	1	2	0	1	0	0	1	0	0	1	0	0	0	0	0	0	0	0	1	1	0	0	1	0	0	0	0	1	1	0
2	2	2	4	1	1	2	2	4	3	5	4	3	2	0	0	0	0	0	1	1	1	1	1	0	0	1	1	0	1	1	0	0	0	0	0	0	0	1	1	1	1	0	1	0	0	0	1	0	0
2	2	2	1	2	1	2	2	3	4	5	4	2	0	0	1	0	0	0	2	1	2	0	1	0	0	1	0	0	1	0	0	0	0	0	0	0	0	1	0	0	0	1	0	0	0	0	1	0	0
2	3	2	1	2	1	2	2	3	5	5	3	2	1	0	0	0	0	0	2	1	1	0	1	0	0	1	0	0	0	0	0	1	0	0	0	0	0	1	0	0	0	0	0	0	0	0	0	0	0
2	1	1	4	1	2	1	2	3	1	4	4	1	0	0	0	0	0	0	2	1	1	0	1	0	0	1	0	0	0	1	0	0	0	0	0	0	0	1	0	0	0	0	0	0	0	0	0	1	0
2	2	2	1	1	2	3	2	3	3	4	4	1	0	0	0	0	0	0	2	1	1	0	1	0	0	0	1	0	1	0	0	0	0	0	0	0	0	1	0	0	0	0	0	0	0	0	0	1	0
2	1	1	4	1	2	1	2	3	2	4	4	0	0	0	1	0	0	0	2	1	2	0	1	0	0	1	0	0	0	1	0	0	0	0	0	0	0	0	0	0	1	0	0	0	0	0	1	0	0
2	1	2	4	1	2	2	2	3	2	3	4	1	0	0	0	0	0	0	2	2	1	0	1	0	0	1	0	0	0	1	0	0	0	0	0	0	1	1	0	0	0	0	0	0	0	0	1	1	0
2	1	1	4	1	2	1	2	4	3	4	4	3	3	0	1	0	0	0	1	1	1	0	1	0	0	1	0	0	0	1	0	0	0	0	0	0	0	1	1	0	0	0	0	0	0	0	1	1	0
1	2	2	1	2	1	2	2	3	5	5	3	2	0	0	0	0	0	0	4	1	2	0	1	0	0	1	0	0	0	1	0	0	0	0	0	0	0	0	0	0	0	0	1	1	0	0	1	1	0
2	1	2	1	1	2	2	2	3	2	5	4	1	0	0	0	0	0	0	2	1	2	1	0	0	0	0	1	0	0	0	1	0	0	0	0	0	0	0	0	0	1	0	0	1	0	0	1	1	0
2	2	2	1	3	1	1	1	1	4	5	4	1	1	0	0	0	0	0	2	2	2	0	0	1	0	1	1	0	0	1	0	0	0	0	0	0	0	1	0	1	1	0	1	0	1	0	0	1	0
2	1	3	1	1	1	1	1	1	1	5	2	1	0	0	0	0	0	0	2	3	2	0	1	0	0	1	0	0	1	0	0	0	0	0	0	0	0	0	0	0	1	0	0	0	0	0	0	1	0
2	2	2	1	1	1	1	1	1	3	5	4	3	2	0	0	0	0	0	1	1	2	0	1	0	0	1	1	0	1	0	0	0	0	0	0	0	1	0	1	1	1	0	0	1	0	0	1	0	0
2	2	3	1	2	1	1	1	1	3	5	4	1	1	0	0	0	0	0	7	1	2	0	1	0	0	1	0	0	0	1	0	0	0	0	0	0	0	1	0	0	0	0	0	1	0	0	0	1	0
2	2	2	1	1	2	1	2	3	3	5	4	1	0	0	0	0	0	0	2	2	1	0	1	0	0	0	1	0	0	1	1	1	0	0	0	0	0	0	0	0	1	0	0	0	0	0	1	0	0
2	1	2	4	1	2	2	2	3	2	5	4	1	0	0	1	0	0	0	1	1	2	0	1	0	0	1	0	0	1	1	1	1	1	0	0	0	0	0	0	1	1	0	1	1	1	1	1	0	0
2	3	3	1	3	1	2	1	2	5	5	4	2	1	0	0	0	0	0	1	2	1	0	0	0	1	1	0	0	0	0	1	0	0	0	0	0	0	0	0	1	0	0	0	0	0	0	1	1	0
2	2	3	4	2	1	2	1	2	3	5	4	3	3	0	0	0	0	0	4	1	2	0	1	0	0	1	1	0	0	1	0	0	0	0	0	0	0	0	0	1	0	0	0	0	0	0	1	0	0
2	2	2	1	1	1	2	1	3	3	5	4	2	0	0	0	0	0	0	3	2	2	0	1	0	0	1	0	0	0	1	1	0	0	0	0	0	1	1	0	1	0	0	0	0	0	1	1	0	0
2	2	3	4	1	1	2	1	3	2	5	2	2	1	0	0	0	0	0	3	2	1	1	0	0	0	0	1	0	0	1	0	0	0	0	0	1	0	1	0	0	0	0	0	0	0	0	1	1	0
2	2	3	1	1	1	2	1	10	2	5	3	2	1	0	0	0	0	0	3	2	1	1	1	0	0	1	1	0	0	1	1	0	0	0	0	0	0	1	0	1	0	0	1	0	0	0	1	1	0
2	2	3	4	1	1	2	1	10	2	5	3	3	0	0	0	0	0	0	3	2	2	0	1	0	0	1	1	0	0	1	1	0	0	0	0	0	1	0	1	1	0	0	0	0	0	0	1	1	0
2	2	3	1	1	1	1	1	3	3	5	2	3	0	0	1	0	0	0	3	2	1	0	1	0	0	1	0	0	1	0	0	0	0	0	0	0	1	0	0	0	0	0	0	0	0	0	0	0	0
1	1	2	4	3	2	1	1	10	1	4	3	1	0	0	0	0	0	0	2	1	2	0	1	0	0	1	0	0	0	1	0	0	0	0	0	0	0	0	0	0	1	0	0	0	0	0	0	1	0
2	2	3	1	1	1	2	1	3	2	3	3	1	0	0	1	0	0	0	2	2	2	0	1	0	0	1	0	0	0	1	0	0	0	0	0	0	0	1	0	0	0	0	0	0	0	0	0	0	0
1	3	3	1	3	1	3	1	2	3	4	3	1	0	0	0	0	0	0	1	1	1	0	1	0	0	1	0	0	0	1	0	0	0	0	0	0	0	0	1	0	0	0	0	0	0	0	0	1	0
2	1	2	4	1	1	2	1	6	2	3	3	2	0	0	0	0	0	0	2	3	2	0	1	0	0	1	0	0	1	0	0	0	0	0	1	0	0	0	0	0	0	0	0	0	0	0	0	1	0
1	3	2	1	3	1	3	1	3	3	4	2	1	0	0	0	0	0	0	7	1	1	1	0	0	0	1	0	0	1	0	0	0	0	0	0	0	0	1	0	0	0	0	0	0	0	0	0	1	0
2	1	2	4	1	1	2	1	2	1	5	4	1	0	0	0	0	0	0	2	1	1	0	1	0	0	0	1	0	0	0	0	1	0	0	0	0	0	1	0	0	1	0	0	0	0	0	0	1	0
1	1	2	4	1	2	1	1	3	1	3	3	1	0	0	0	0	0	0	2	1	2	0	1	0	0	1	0	0	0	0	1	0	0	0	0	0	0	1	0	0	1	0	0	0	0	0	0	1	0
1	1	3	4	1	1	2	1	1	2	3	3	1	1	0	0	0	0	0	5	1	2	0	1	0	0	1	1	0	0	0	1	1	0	0	0	0	0	1	1	0	0	0	0	0	0	0	0	1	0
2	2	2	1	1	1	2	1	2	1	3	4	1	0	0	0	0	0	0	2	2	1	0	1	0	0	1	1	0	1	1	0	0	0	0	0	0	0	0	0	0	1	0	0	1	0	0	1	1	0
2	1	2	4	1	2	2	1	1	1	3	3	0	1	0	0	0	0	0	1	1	1	0	1	0	0	1	0	0	0	1	0	0	0	0	0	0	0	0	1	1	0	0	0	0	0	0	1	1	0
2	1	1	4	1	2	2	1	1	2	3	3	0	1	0	0	0	0	0	1	2	2	0	1	1	0	0	1	1	1	0	0	0	0	0	0	0	0	0	1	0	1	1	0	0	0	0	0	1	0
1	2	3	1	1	1	3	1	3	2	4	4	0	1	0	0	0	0	0	2	1	1	0	1	0	0	1	0	0	0	1	0	0	0	0	0	0	0	0	0	1	0	1	0	0	0	0	1	1	0
1	2	2	1	1	1	3	1	2	2	4	4	1	0	0	0	0	0	0	2	1	1	0	1	0	0	1	0	0	1	0	0	0	0	0	0	0	0	0	1	1	0	0	0	0	0	0	1	1	0
1	2	3	1	1	1	3	1	2	2	4	4	1	0	0	0	0	0	0	2	2	2	0	1	0	0	1	1	0	0	0	1	0	0	0	0	0	0	0	1	1	0	0	0	0	0	0	0	1	0
2	2	1	4	1	1	2	3	10	2	5	4	1	0	0	0	0	0	0	5	1	2	0	1	0	0	0	1	0	1	0	0	0	0	0	0	0	0	1	1	0	0	0	1	0	0	0	0	1	0
2	1	1	4	1	1	2	1	3	1	3	3	2	0	0	0	0	0	0	2	2	1	0	1	0	0	1	0	0	1	0	0	0	0	0	0	0	0	1	0	0	1	0	1	0	0	0	1	1	0
2	1	1	1	1	2	1	1	4	1	5	3	1	1	0	1	1	0	0	2	1	1	0	1	0	0	1	0	0	0	1	0	0	0	0	0	0	0	1	1	0	0	1	0	0	0	0	0	1	0
1	1	2	4	1	1	3	3	10	2	3	3	1	0	0	0	0	0	0	5	1	2	0	1	0	0	1	1	0	1	0	0	0	0	0	0	0	0	0	1	1	0	1	0	0	0	0	1	1	0
2	1	2	1	1	1	2	1	2	2	5	4	1	1	0	0	0	0	0	2	2	1	0	1	1	0	1	1	0	1	1	0	0	0	0	0	0	0	0	1	1	1	1	0	0	0	0	1	1	0
2	1	2	4	1	1	2	1	9	2	4	4	1	1	0	0	0	0	0	2	1	1	0	1	0	0	1	1	0	1	1	0	0	0	0	0	0	0	1	1	1	0	0	0	0	0	0	1	1	0
1	1	2	4	1	2	2	1	1	1	5	4	1	1	0	0	0	0	0	1	2	2	0	1	1	0	1	1	0	1	1	0	0	0	0	0	0	0	1	1	1	0	0	0	0	0	0	1	1	0
2	2	3	1	1	1	1	1	2	3	5	4	3	3	0	0	0	0	0	3	2	1	0	1	0	0	1	1	0	1	1	0	0	0	0	0	0	0	0	0	1	1	0	1	0	0	0	1	1	0
2	1	3	4	1	1	1	1	2	2	5	4	3	3	0	1	0	0	0	3	1	2	0	1	0	0	1	0	0	0	0	1	0	0	0	0	1	0	0	0	0	0	0	0	1	1	0	1	0	0
1	2	3	1	1	1	1	1	3	3	5	4	1	1	0	0	0	0	0	1	2	1	0	1	0	0	1	0	0	0	0	0	1	0	0	0	0	0	0	0	0	0	0	0	0	0	1	0	1	0
1	2	3	1	1	1	1	1	3	2	5	4	1	1	0	0	0	0	0	2	1	2	0	1	0	0	1	0	0	1	0	0	0	0	1	0	0	0	0	0	0	0	0	0	0	0	0	1	1	0
2	2	3	1	2	1	2	1	3	4	5	3	3	0	0	0	0	0	0	3	1	2	0	1	0	0	1	1	0	0	0	1	1	0	0	0	0	0	1	0	0	1	0	0	1	0	0	1	1	0
2	1	3	1	1	1	2	1	3	2	4	2	3	0	0	0	0	0	0	3	2	2	0	1	0	0	1	0	0	1	1	0	0	0	0	0	0	0	0	1	1	0	0	0	0	0	0	1	0	0
2	2	3	1	2	1	2	1	9	3	5	2	3	1	0	0	0	0	0	3	2	1	0	1	0	0	1	0	0	1	0	0	0	0	0	0	0	0	1	0	1	1	0	1	0	0	0	1	0	0
2	2	2	1	1	1	1	1	9	3	5	4	3	0	0	0	0	0	0	3	2	2	1	1	1	0	1	1	0	1	1	0	0	0	0	0	0	1	1	1	1	1	1	1	1	1	1	1	0	0
2	2	3	1	1	1	2	1	9	3	5	2	3	2	0	0	0	0	0	4	1	2	0	1	1	0	1	1	0	1	1	0	0	0	0	0	0	1	0	0	1	0	0	1	1	0	1	1	1	0
1	3	3	1	3	1	3	1	10	3	4	3	2	0	0	1	0	0	0	3	1	2	0	0	1	0	1	0	0	0	1	0	0	0	0	1	0	0	0	0	0	0	0	0	0	0	0	0	0	0
1	6	3	1	3	1	3	1	9	2	4	3	1	0	0	1	0	0	0	2	1	1	0	1	0	0	1	0	0	0	0	1	0	0	0	1	0	0	0	0	0	0	0	0	0	0	0	0	1	0
1	1	2	4	1	1	2	1	2	1	3	3	1	0	0	0	0	0	0	2	1	1	0	1	0	0	1	0	0	0	0	0	1	0	0	0	0	0	1	0	0	1	0	0	0	0	0	0	1	0
2	2	3	1	1	1	1	1	2	3	5	3	3	3	0	1	1	0	0	3	2	1	0	1	0	0	0	1	0	0	0	0	1	0	0	0	0	0	0	0	1	0	1	0	0	0	0	1	0	0
2	3	3	1	3	1	2	1	2	5	5	4	1	1	0	0	0	0	0	1	2	1	0	1	0	0	1	0	0	0	1	0	0	0	0	0	0	0	0	1	0	0	0	0	0	0	0	1	0	0
2	1	3	4	1	1	2	1	2	3	4	3	3	1	0	0	0	0	0	3	2	2	0	1	0	0	1	0	0	0	0	1	0	0	0	0	0	1	1	1	1	1	1	0	1	0	0	1	1	0
2	2	3	1	2	1	2	1	2	3	5	4	3	1	0	0	0	0	0	2	2	2	0	1	0	0	1	1	0	1	0	0	1	0	0	0	0	0	1	0	0	0	0	0	0	0	0	0	0	0
2	1	3	1	1	2	1	1	2	2	5	4	1	0	0	0	0	0	0	3	2	2	0	1	0	0	1	0	0	0	1	0	0	0	0	0	0	1	0	0	0	0	0	0	0	0	0	0	1	0
1	2	3	1	1	1	2	1	2	2	5	4	3	3	0	0	0	0	0	2	2	1	0	1	1	0	1	1	0	0	1	1	0	0	0	0	1	0	1	1	1	1	0	1	1	1	0	1	0	0
2	2	2	1	2	1	2	1	2	3	5	4	3	0	0	0	0	0	0	3	1	2	0	1	1	0	1	1	0	0	1	1	0	0	0	0	0	0	1	1	1	1	0	0	0	1	0	0	0	0
2	1	2	1	1	1	2	1	6	3	5	3	3	2	0	0	0	0	0	2	1	2	0	1	0	0	1	1	0	1	1	0	0	0	0	0	0	0	1	0	0	1	0	0	0	0	0	1	1	0
2	1	3	4	1	1	1	1	6	1	5	3	2	1	0	0	0	0	0	3	1	2	0	1	0	0	1	0	0	1	1	1	0	0	0	0	0	0	1	0	1	1	1	0	1	1	0	1	1	0
2	1	2	1	1	2	2	1	6	2	5	4	2	0	0	0	0	0	0	2	1	2	0	1	0	0	1	0	0	0	1	0	0	0	0	0	0	0	0	0	0	0	0	0	1	0	0	0	1	0
1	2	2	1	1	1	2	1	6	3	5	4	2	1	0	0	0	0	0	1	2	2	0	1	0	0	1	0	0	1	1	0	0	0	0	0	0	0	1	0	1	0	0	1	0	0	0	0	1	0
1	2	2	1	1	1	2	1	6	3	5	2	1	1	0	0	0	0	0	2	1	1	0	1	0	0	1	0	0	0	1	0	0	0	0	0	0	0	0	0	1	0	0	0	0	0	0	1	0	0
2	1	2	4	1	2	2	1	6	2	5	4	1	0	0	0	0	0	0	2	1	1	0	1	0	0	1	0	0	1	0	0	0	0	0	0	0	0	1	0	1	0	0	0	1	0	0	1	1	0
2	1	3	4	1	1	3	1	6	2	5	1	1	0	0	0	0	0	0	2	2	1	0	1	0	0	1	0	0	1	0	0	0	0	0	0	0	0	1	0	1	1	0	0	0	0	0	1	0	0
2	2	1	1	1	2	2	2	9	4	4	4	2	0	0	0	0	0	0	1	1	2	0	1	0	0	0	1	0	1	1	0	0	0	0	0	0	0	0	1	0	0	0	0	0	0	0	0	1	0
2	2	2	1	1	1	2	1	2	3	5	3	3	1	0	0	0	0	0	3	1	2	0	1	0	0	1	1	0	0	1	0	0	0	0	0	0	0	1	1	0	1	1	1	1	1	0	0	0	0
2	1	2	1	1	1	2	1	2	2	5	4	2	0	0	0	0	0	0	7	2	2	0	1	0	0	1	0	0	1	0	0	0	0	0	0	0	0	1	1	1	0	0	0	0	0	0	1	0	0
2	1	1	1	1	2	2	2	2	3	5	4	3	1	0	0	0	0	0	2	1	1	0	1	0	0	0	1	0	1	0	0	1	0	0	0	0	0	1	0	1	1	0	0	1	0	0	1	0	0
2	2	1	1	1	2	2	2	2	3	5	4	3	3	0	0	0	0	0	4	1	2	0	1	0	0	1	1	0	0	1	0	0	0	1	1	1	1	1	1	1	1	1	1	1	1	0	1	1	0
2	1	2	4	1	2	2	2	2	2	5	4	3	3	0	0	0	0	0	2	2	1	0	1	0	0	1	1	0	1	1	1	1	0	0	0	0	0	1	1	0	1	0	1	1	1	0	1	0	0
2	1	1	1	1	2	2	2	2	3	5	4	2	2	0	0	0	0	0	2	1	2	0	1	0	0	0	1	0	0	0	0	1	0	0	0	0	0	1	0	0	1	0	0	1	0	0	1	1	0
2	1	1	4	1	2	2	2	2	3	5	4	1	2	0	0	0	0	0	2	1	2	0	1	0	0	1	1	1	1	1	0	0	0	0	0	0	0	1	0	0	1	0	0	1	0	0	1	1	0
2	2	2	1	2	1	2	2	2	3	4	4	1	0	0	0	0	0	0	4	1	2	0	1	0	0	1	0	0	1	1	0	0	0	0	0	0	1	1	0	0	0	0	0	0	0	0	1	1	0
2	1	1	4	1	2	2	2	2	2	5	4	2	0	0	0	0	0	0	4	1	2	1	1	0	0	1	1	1	0	0	0	0	0	0	1	1	0	1	0	1	1	0	0	1	0	0	1	0	0
2	1	1	1	1	2	2	2	2	2	5	4	2	0	0	0	0	0	0	4	1	2	0	1	0	0	1	1	0	1	1	0	1	0	0	1	1	0	1	0	1	1	1	0	1	0	0	1	1	0
2	1	2	1	1	2	2	2	2	2	5	4	3	2	0	1	0	0	0	2	1	2	0	1	0	0	0	1	0	0	1	1	1	1	0	0	0	0	1	0	0	1	0	1	1	0	1	1	1	0
2	1	2	4	1	2	2	2	2	3	5	4	1	0	0	0	0	0	0	4	2	2	0	0	1	0	1	0	0	1	0	0	0	0	0	0	0	1	0	0	0	1	0	0	0	0	0	0	1	0
1	3	3	1	3	1	2	1	3	5	5	4	1	0	0	0	0	0	0	1	1	1	0	1	0	0	1	0	0	1	0	0	0	0	0	0	0	0	0	1	0	0	0	0	0	0	0	0	1	0
1	1	3	4	1	1	3	1	3	2	5	4	3	1	0	0	0	0	0	2	1	2	0	1	0	0	0	1	0	0	1	0	0	0	0	0	0	0	0	0	1	0	0	0	0	0	0	0	1	0
2	1	1	4	1	2	1	2	3	1	4	2	0	1	0	0	0	0	0	2	1	1	1	0	0	0	1	0	0	0	0	0	1	0	0	0	0	0	0	0	0	0	0	1	0	0	0	1	0	0
2	1	1	4	2	2	2	2	3	3	5	3	3	2	0	0	0	0	0	2	1	1	1	1	0	0	1	1	0	1	1	0	0	0	0	0	0	0	1	1	0	0	1	1	1	0	0	1	1	0
2	2	2	1	1	1	3	2	3	3	5	4	3	1	0	0	0	0	0	2	1	2	0	1	1	0	1	1	0	1	1	0	0	0	0	0	0	0	0	1	0	0	0	0	0	0	0	1	0	0
2	1	1	4	2	2	2	2	3	2	5	3	3	0	0	0	0	0	0	2	1	1	0	1	1	0	1	1	0	1	0	0	0	0	0	0	0	0	0	1	0	1	0	1	0	0	1	1	0	0
2	2	2	1	2	1	3	1	1	3	5	4	0	0	0	1	0	0	0	1	3	1	0	1	0	0	1	0	0	0	1	0	0	0	0	0	0	0	0	1	0	0	0	0	0	1	0	0	0	0
1	2	2	4	1	1	2	1	1	2	5	3	0	0	0	0	1	0	0	2	2	1	0	1	0	0	1	0	0	0	0	1	0	0	1	0	0	0	0	0	0	0	0	0	0	0	0	0	0	0
2	2	2	1	2	1	3	1	1	3	5	2	0	0	1	0	0	0	0	2	1	2	0	0	1	0	1	0	0	1	0	0	0	0	0	0	0	0	1	0	0	1	0	0	0	0	0	0	0	0
2	2	2	1	3	1	4	1	1	4	5	3	0	0	0	0	0	1	0	2	2	1	0	1	0	0	1	1	0	1	1	1	0	0	0	0	1	1	0	0	0	0	0	0	0	1	0	0	1	0
1	1	2	4	2	1	2	1	1	2	5	3	1	0	0	0	0	0	0	4	1	2	0	0	1	0	1	0	0	0	1	0	0	0	1	0	0	0	1	0	0	0	0	0	0	1	0	0	0	0
2	2	2	1	2	2	2	1	1	2	5	4	1	0	1	0	0	0	0	1	1	2	0	1	0	0	1	0	0	0	1	1	0	0	0	0	0	0	1	0	0	0	0	0	0	0	0	0	0	0
2	1	1	1	3	1	3	2	1	3	5	4	0	1	0	0	0	0	0	5	1	1	1	0	0	0	1	0	0	0	0	1	0	0	0	0	0	1	1	0	0	0	0	0	0	0	0	1	0	0
2	1	1	4	1	2	2	2	1	2	5	4	1	0	0	0	0	0	0	3	2	1	0	1	0	0	0	1	0	0	1	0	0	0	0	1	1	0	0	0	0	1	0	0	0	0	0	0	0	0
2	1	1	4	1	2	1	2	1	1	5	3	1	0	0	0	0	0	0	2	1	2	0	1	0	0	1	0	0	1	0	0	0	0	0	0	0	0	1	1	0	1	1	1	1	0	0	0	1	0
2	1	2	4	2	2	2	2	1	3	5	2	1	0	0	0	0	0	0	1	3	1	0	1	0	0	1	0	0	1	0	0	0	0	0	0	0	0	1	1	0	0	0	0	0	0	0	0	0	0
2	1	1	1	1	2	3	2	1	3	5	4	0	0	0	1	0	0	0	4	1	2	0	1	0	0	1	0	0	0	1	0	0	0	0	0	0	1	0	0	1	0	1	0	0	0	0	0	0	1
2	1	2	4	1	1	3	2	1	3	5	4	1	0	0	0	1	0	0	4	1	2	0	0	1	0	1	1	0	0	1	0	0	0	0	0	0	0	1	0	0	0	1	0	0	0	0	0	0	0
2	1	2	1	1	2	3	2	6	3	5	4	2	1	1	0	0	0	0	1	1	1	0	1	0	0	1	0	0	1	0	0	0	0	0	0	0	0	1	0	0	0	0	0	0	0	0	1	1	0
2	1	2	4	2	2	2	2	6	2	5	4	2	0	0	0	0	0	0	2	1	1	0	1	0	0	1	1	0	1	1	1	1	0	0	0	0	0	1	1	1	0	0	1	1	1	0	1	1	0
2	1	2	4	1	2	2	2	6	2	5	4	1	1	0	0	0	0	0	1	2	2	0	1	0	0	1	0	0	0	0	1	0	0	0	0	0	0	1	0	0	0	0	1	0	0	0	0	1	0
1	6	2	4	3	1	3	1	9	5	4	3	3	2	0	0	0	0	0	1	1	1	1	1	0	0	1	1	0	1	1	0	0	0	0	0	0	0	1	0	0	1	0	0	0	1	0	1	1	0
2	3	2	1	3	1	3	1	9	4	4	4	1	0	0	0	0	0	0	1	1	2	0	1	0	0	1	0	0	0	1	0	0	0	0	0	0	0	0	1	0	0	0	0	0	0	0	0	1	0
1	1	3	4	2	1	1	1	9	2	4	4	3	2	0	1	1	0	0	1	1	2	0	1	0	0	0	1	0	0	1	0	0	0	0	0	0	0	1	0	0	0	0	0	0	0	0	1	0	0
1	3	2	1	3	1	3	1	9	4	4	4	1	1	0	0	0	0	0	1	1	1	0	1	0	0	1	0	0	0	1	0	0	0	0	0	0	0	1	1	0	0	0	1	0	0	0	0	1	0
2	2	1	1	1	2	2	2	9	3	4	4	2	0	0	0	0	0	0	1	1	1	0	1	0	0	1	1	0	0	1	1	1	0	0	0	0	0	1	1	0	1	0	0	0	0	0	1	1	0
2	2	3	1	1	1	2	1	9	3	5	4	3	3	0	0	0	0	0	3	2	1	0	0	0	1	1	0	0	0	1	0	0	0	0	0	0	1	1	0	0	0	0	0	0	0	0	0	0	0
2	2	2	1	2	1	2	1	9	4	5	4	3	0	0	0	0	0	0	3	1	1	0	1	0	0	1	0	0	0	0	1	0	0	1	1	1	0	1	1	1	1	1	1	1	0	0	1	0	0
2	2	2	1	2	1	2	1	9	3	4	4	2	0	0	0	0	0	0	1	1	1	0	1	0	0	1	1	0	1	1	1	0	0	0	0	0	0	1	1	0	0	0	0	0	0	0	1	1	0
2	2	2	4	1	1	1	1	9	3	4	4	2	0	0	0	0	0	0	1	1	1	0	1	0	0	1	0	0	0	1	1	1	0	0	0	0	0	1	1	1	0	0	1	1	0	0	1	1	0
1	6	3	1	3	1	3	1	9	5	5	4	1	0	0	0	0	0	0	1	1	1	0	1	0	0	1	0	0	0	0	1	0	0	0	0	0	0	1	1	0	0	0	0	0	0	0	0	1	0
1	2	3	4	2	1	2	1	9	3	4	4	3	2	0	0	0	0	0	3	1	2	0	1	0	0	1	1	0	0	1	1	0	0	0	0	0	0	1	1	1	0	0	0	1	0	0	1	0	0
2	2	2	1	2	1	2	2	10	4	5	4	3	2	0	0	0	0	0	4	1	1	1	0	0	0	0	1	0	0	1	0	0	0	0	0	0	0	1	1	1	0	0	0	0	0	0	1	1	0
2	1	1	4	1	2	1	2	1	3	5	4	2	0	0	0	0	0	0	4	1	1	1	1	0	0	1	0	0	0	1	0	0	0	0	0	0	0	1	1	1	0	0	0	1	0	0	0	1	0
2	3	2	1	2	1	2	2	10	5	4	4	2	0	0	0	0	0	0	4	1	2	1	1	0	0	1	0	0	1	1	0	0	0	0	0	0	0	0	1	0	0	0	1	0	0	0	1	0	0
2	2	2	1	1	2	2	2	10	4	4	4	2	0	0	0	0	0	0	4	1	2	1	1	0	0	1	0	0	1	0	0	0	0	0	0	0	0	0	1	0	0	0	1	0	0	0	1	0	0
1	1	1	4	1	1	1	3	10	2	5	4	2	0	0	0	0	0	0	3	1	2	0	1	0	0	1	1	0	1	1	0	0	1	0	0	0	0	1	0	1	0	0	0	0	0	0	1	1	0
2	1	1	1	1	2	2	3	10	2	4	4	3	2	0	0	0	0	0	4	1	2	0	1	0	0	1	1	0	1	1	0	0	0	0	0	0	1	1	0	0	0	0	1	0	0	0	0	1	0
2	2	2	1	3	1	2	1	10	3	4	4	2	0	0	0	0	0	0	3	1	2	0	1	0	0	1	1	0	1	1	0	0	1	0	0	0	0	1	0	1	0	0	0	0	0	0	1	1	0
2	6	2	1	3	1	2	1	10	5	5	3	1	0	0	0	0	0	0	4	1	2	0	1	0	0	1	1	0	1	0	0	0	0	0	0	0	0	0	0	1	0	0	0	0	0	0	1	1	0
2	1	2	4	1	1	1	1	10	2	5	4	2	1	0	0	0	0	0	3	1	2	1	1	0	0	0	1	0	0	1	0	0	0	0	0	0	0	0	1	0	0	0	1	0	0	0	1	1	0
1	2	2	4	2	1	2	1	10	4	4	4	2	0	0	0	0	0	0	4	2	2	0	1	0	0	1	0	0	1	0	0	0	0	0	0	0	0	0	1	1	0	1	1	0	0	0	1	1	0
2	1	2	4	1	1	2	1	9	2	5	4	1	0	0	0	0	0	0	3	1	1	1	0	0	0	0	1	0	1	0	0	0	0	0	0	0	0	0	1	0	0	0	0	0	0	0	0	1	0
2	1	2	1	1	1	1	1	10	3	5	4	3	0	0	0	0	0	0	4	1	2	0	1	0	0	1	0	0	0	1	0	0	0	0	0	0	0	0	1	0	0	1	1	1	0	0	1	0	0
2	3	2	1	2	1	2	2	1	5	5	4	3	3	0	0	0	0	0	1	2	1	0	1	0	0	1	0	0	1	0	1	1	0	0	0	0	0	1	1	0	0	0	1	0	0	0	0	1	0
1	1	3	1	2	1	2	1	2	2	5	4	2	0	0	0	0	0	0	2	1	1	0	1	0	0	1	0	0	0	1	0	0	0	0	0	0	0	1	0	0	0	0	0	0	0	0	0	1	0
2	2	3	1	1	1	1	1	6	2	5	1	3	1	0	0	0	0	0	2	1	1	0	1	0	0	1	0	0	0	1	0	0	0	0	0	0	0	0	0	1	0	0	1	0	0	0	1	0	0
1	2	3	1	2	1	2	1	6	3	5	3	3	3	0	1	1	0	0	2	2	2	0	1	1	0	1	1	0	1	1	1	1	1	0	0	0	0	1	0	0	1	0	0	1	0	0	1	1	0
2	2	2	1	2	1	2	2	6	3	4	3	2	0	0	0	0	0	0	7	1	1	0	1	1	0	0	1	0	1	0	0	1	0	0	0	0	0	0	0	0	0	0	0	0	0	1	1	1	0
2	2	2	1	1	1	3	2	1	4	4	4	1	0	0	0	0	0	0	5	2	2	0	1	0	0	0	1	0	0	1	0	0	0	0	0	0	0	0	1	1	0	0	0	0	0	0	0	1	0
2	1	2	4	1	1	1	2	1	1	4	4	1	0	0	0	0	0	0	1	1	2	0	1	0	0	0	1	0	1	0	0	0	0	0	0	0	0	0	1	0	1	0	0	0	0	0	1	0	0
2	3	2	1	2	1	3	2	1	5	5	4	3	3	0	0	0	0	0	5	1	2	0	1	0	0	0	1	0	0	0	1	0	0	0	0	0	0	0	0	0	1	1	0	1	1	1	1	1	0
2	1	1	4	1	1	3	2	3	3	4	4	3	3	1	0	0	0	0	5	2	1	0	1	0	0	1	0	0	0	1	0	0	0	0	0	0	0	1	0	1	1	0	1	1	1	0	1	0	0
2	1	1	4	1	2	1	2	2	2	4	3	2	1	0	1	0	0	0	2	1	2	0	1	0	0	0	1	0	0	0	1	0	0	0	0	0	0	0	0	0	0	1	0	0	0	0	1	1	0
2	2	2	1	2	1	2	2	2	3	5	4	2	3	0	0	0	0	0	5	2	2	0	1	0	0	1	1	0	0	1	0	0	0	0	0	0	0	1	1	0	1	0	0	0	1	0	1	0	0
2	1	2	4	1	2	2	2	3	2	5	4	3	3	0	0	0	0	0	2	2	1	0	1	0	0	1	1	0	1	1	1	1	1	0	0	0	0	1	1	1	0	0	1	1	1	0	1	1	0
2	2	2	4	2	1	3	2	2	4	5	4	3	3	0	0	0	0	0	2	1	1	0	1	0	0	1	1	0	1	1	1	1	1	0	0	0	0	1	0	0	1	0	0	1	1	1	1	1	0
2	2	2	1	2	1	3	2	3	4	5	4	2	3	0	0	0	0	0	2	2	2	0	1	0	0	1	0	0	0	1	0	0	0	0	0	0	1	1	0	1	1	1	1	1	1	0	1	1	0
2	1	2	4	1	1	3	2	3	2	5	4	3	3	0	0	0	0	0	2	2	1	0	1	1	0	1	1	0	1	1	1	1	1	0	0	0	0	1	1	1	1	1	1	1	1	0	1	1	0
2	1	2	4	1	1	2	2	3	2	5	4	2	0	0	0	0	0	0	2	1	2	0	1	0	0	0	1	0	1	0	0	0	0	0	0	0	0	0	0	0	0	0	0	0	0	1	1	0	0
2	1	1	4	1	2	1	2	2	1	5	4	3	3	0	0	0	0	0	2	1	2	0	1	0	0	1	1	0	1	0	0	0	0	0	0	0	0	1	1	1	0	0	1	0	0	0	1	0	0
2	1	2	4	1	1	2	2	2	2	5	4	2	0	0	0	0	0	0	5	1	2	0	1	0	0	1	1	0	1	1	0	0	0	0	0	0	0	1	0	0	1	1	0	0	0	0	0	1	0
2	1	1	4	1	2	1	2	6	1	5	4	3	3	0	0	0	0	0	2	1	2	1	0	0	0	1	0	0	0	1	0	0	0	0	0	0	0	0	0	0	1	0	0	0	0	0	1	0	0
2	1	2	4	1	1	2	2	6	2	4	3	2	0	0	0	0	0	0	2	1	1	0	1	0	0	1	1	0	1	1	1	0	0	0	0	0	0	1	0	0	1	1	0	0	0	0	1	1	0
2	1	2	1	1	2	2	1	9	3	5	4	2	0	0	0	0	0	0	1	1	2	0	1	0	0	1	0	0	0	1	0	0	0	0	0	0	0	1	0	1	1	0	1	1	0	0	1	1	0
2	2	3	4	2	1	3	1	1	3	5	4	2	2	0	1	0	0	0	1	2	1	0	1	0	0	1	0	0	1	0	0	1	0	0	0	0	0	0	1	1	0	0	0	0	0	0	1	0	0
2	2	3	1	2	1	3	1	2	3	5	4	3	3	0	1	0	0	0	1	1	1	0	1	0	0	1	1	0	0	0	0	1	0	1	1	1	1	1	1	1	1	0	1	1	1	0	0	1	0
1	6	2	1	3	1	3	1	1	3	5	4	3	3	0	0	0	0	0	1	1	2	0	1	0	0	1	0	0	0	1	0	0	0	0	0	0	0	1	0	1	0	0	0	0	1	0	0	1	0
2	2	3	1	2	1	3	1	2	3	5	4	1	1	0	0	0	0	0	1	1	1	0	1	0	0	1	0	0	0	1	0	0	0	0	0	0	0	1	1	1	0	0	1	1	0	0	0	1	1
2	1	2	4	1	1	1	1	1	2	5	4	3	0	0	0	0	0	0	1	1	1	0	1	0	0	1	1	0	0	1	1	1	0	0	0	0	0	0	1	1	1	1	1	0	0	0	1	0	0
2	2	3	1	2	1	2	1	6	3	5	4	2	1	0	0	0	0	0	1	1	1	0	1	0	0	0	1	0	0	0	0	1	0	0	0	0	0	1	1	1	0	1	0	0	0	0	1	1	0
2	3	2	1	3	1	3	1	9	4	5	4	2	0	0	0	0	0	0	1	1	1	0	1	0	0	1	1	0	1	1	1	1	1	0	0	0	0	0	1	0	0	0	0	0	0	0	1	1	0
1	3	3	1	3	1	4	1	3	5	5	4	1	1	0	0	0	0	0	1	1	1	0	1	0	0	1	0	0	0	1	0	0	0	0	0	0	0	0	0	1	0	0	0	0	0	1	0	1	0
1	3	3	1	3	1	3	1	2	5	4	4	3	2	0	0	0	0	0	1	1	1	0	1	0	0	1	0	0	1	1	0	0	0	0	0	0	0	0	1	1	0	0	1	0	0	0	1	1	0
1	2	2	1	1	1	3	1	2	2	5	4	3	0	0	0	0	0	0	1	2	1	0	1	0	0	1	0	0	0	0	1	0	0	0	0	0	0	1	1	1	0	0	0	0	0	0	1	1	0
2	2	2	1	1	1	2	1	1	3	5	4	2	1	0	0	0	0	0	1	2	1	0	1	0	0	0	1	0	0	1	0	0	0	0	0	0	0	1	0	0	0	0	1	0	0	0	0	1	0
2	2	3	1	2	1	1	1	2	3	5	4	1	1	0	1	0	0	0	1	1	1	0	1	0	0	1	0	0	0	0	1	0	0	0	0	0	0	0	0	0	0	0	0	0	0	1	0	0	0
1	2	3	1	2	1	2	1	3	4	5	3	3	2	0	0	0	0	0	3	1	2	0	1	0	0	1	0	0	0	1	0	0	0	0	0	0	0	1	0	0	1	0	0	0	1	0	1	0	0
1	2	3	1	2	1	1	1	3	4	5	4	2	1	0	0	0	0	0	3	1	1	0	0	0	1	1	0	0	1	0	0	0	0	0	0	0	0	1	0	1	0	0	0	0	0	1	1	0	0
1	6	2	1	3	1	2	1	3	5	5	3	2	0	0	0	0	0	0	1	1	2	0	1	0	0	1	0	0	0	1	0	0	0	0	0	0	0	0	0	1	0	0	0	0	0	0	0	0	0
1	2	3	1	1	1	3	1	3	3	4	3	2	0	0	0	0	0	0	1	1	1	0	1	0	0	1	0	0	0	1	0	0	0	0	0	0	0	0	0	0	1	0	0	0	1	0	0	0	0
1	2	3	1	2	1	2	1	6	3	5	3	3	3	0	1	0	0	0	2	2	2	0	1	0	0	1	1	0	1	1	1	1	1	0	0	0	0	0	0	0	1	0	0	1	0	0	1	0	0
2	2	2	4	2	1	3	1	6	4	5	3	1	2	0	1	0	0	0	2	1	2	0	1	0	0	1	0	0	0	1	0	0	0	0	0	0	0	0	1	1	0	0	1	0	0	0	1	1	0
2	2	3	1	1	1	1	1	6	2	5	4	3	3	0	2	1	0	0	2	1	1	0	1	0	0	1	0	0	0	1	0	0	0	0	0	0	0	0	0	1	0	0	1	1	0	0	1	1	0
2	3	2	1	3	1	3	1	6	4	5	4	0	1	0	0	0	0	0	3	1	2	0	1	0	0	0	1	0	0	0	0	1	0	0	0	0	0	0	0	1	0	0	1	0	0	0	0	0	0
1	1	3	1	1	1	2	1	2	2	5	4	1	1	0	0	0	0	0	2	1	1	0	1	0	0	1	0	0	0	1	0	0	0	0	0	0	0	1	0	0	0	0	0	0	0	0	1	0	0
2	2	3	1	2	1	2	1	6	3	5	4	2	1	0	0	0	0	0	2	1	2	0	1	0	0	1	0	0	1	0	0	0	0	0	0	0	0	0	0	1	0	0	1	0	0	0	1	1	0
2	2	3	1	2	1	2	1	6	4	5	4	2	0	0	0	0	0	0	1	2	1	0	1	0	0	0	1	0	0	1	0	0	0	0	0	0	0	0	1	0	0	0	1	0	0	0	0	1	0
2	3	3	1	3	1	3	1	2	5	5	4	2	0	0	0	0	0	0	2	2	2	0	1	0	0	1	1	0	0	0	1	0	0	1	0	0	0	1	0	0	0	0	0	0	0	0	1	0	0
1	2	2	1	2	1	3	1	9	3	4	2	1	1	0	0	0	0	0	1	1	1	0	1	0	0	1	1	0	0	1	0	0	0	0	0	0	0	1	0	1	1	0	0	0	0	0	1	0	0
1	2	3	1	1	1	2	1	9	2	4	2	1	0	0	0	0	0	0	3	1	2	0	1	0	0	1	1	0	0	1	0	0	0	0	0	0	1	1	0	1	1	1	0	0	0	0	1	0	0
2	2	2	1	3	1	3	1	2	3	5	4	2	1	0	0	0	0	0	1	1	2	0	1	0	0	0	1	0	0	0	0	1	0	0	0	0	0	1	1	1	0	0	0	0	0	0	0	1	0
2	2	2	1	2	1	2	1	2	3	5	4	2	2	0	0	0	0	0	1	2	1	0	1	0	0	1	1	0	0	1	1	0	0	0	0	0	0	0	0	1	0	0	0	0	0	1	0	1	0
2	2	2	1	2	1	3	1	2	2	5	4	2	2	0	0	0	0	0	1	1	1	0	1	0	0	1	1	0	0	1	0	0	1	0	0	0	0	0	1	0	1	0	0	0	0	0	1	1	0
2	1	2	1	1	1	1	1	2	2	5	3	2	0	0	0	0	0	0	2	1	2	0	1	0	0	1	1	0	0	0	1	0	0	0	0	0	0	0	0	0	1	0	0	0	0	0	1	0	0
2	2	2	4	2	1	2	1	2	3	5	4	1	0	0	0	0	0	0	1	2	1	0	1	0	0	0	1	0	0	0	1	0	0	0	0	0	0	1	0	0	0	0	0	0	0	0	0	1	0
2	1	2	1	1	1	2	1	2	3	5	3	3	1	0	0	0	0	0	1	2	1	0	1	0	0	1	1	0	0	1	1	0	0	0	0	0	0	1	1	1	0	0	1	1	0	0	0	0	0
1	3	3	1	3	1	3	1	2	4	5	3	3	1	0	1	0	0	0	2	2	2	0	1	0	0	1	0	0	0	0	1	0	0	0	0	0	0	0	0	0	1	0	0	0	0	0	0	1	0
2	1	3	1	1	1	2	1	2	2	5	4	3	0	0	0	0	0	0	2	1	2	0	1	0	0	1	0	0	0	1	0	0	0	0	0	0	0	0	1	1	0	0	0	0	0	1	0	1	0
2	2	2	4	2	1	3	1	3	3	5	4	2	2	0	0	0	0	0	1	2	1	0	1	0	0	1	0	0	0	0	0	1	0	0	0	0	0	0	1	0	0	0	0	0	0	0	0	0	0
2	2	2	1	2	1	2	1	3	3	4	3	3	2	0	0	0	0	0	3	2	2	0	1	0	0	1	0	0	0	1	0	0	0	0	0	0	0	0	0	1	0	0	0	0	0	0	1	1	0
1	2	2	1	2	1	3	1	2	3	5	4	1	0	0	0	0	0	0	1	1	1	0	1	0	0	1	0	0	1	0	0	0	0	0	0	0	0	1	1	0	1	1	1	0	0	0	1	0	0
2	2	2	1	3	1	4	1	1	4	5	4	1	1	0	0	0	0	0	1	2	1	0	1	0	0	1	0	0	0	1	0	0	0	0	0	0	0	1	0	1	1	0	0	0	0	0	1	0	0
2	2	3	1	2	1	3	1	4	3	5	3	3	1	0	0	0	0	0	3	2	2	0	1	0	0	0	1	0	0	0	0	0	1	0	0	0	0	0	0	0	1	1	0	0	0	0	1	1	0
2	2	3	1	2	1	3	1	4	3	5	4	1	0	0	0	0	0	0	2	2	2	0	1	0	0	1	0	0	0	1	0	0	0	0	0	0	0	1	0	0	0	0	0	0	0	0	0	1	0
1	1	2	4	1	1	3	1	2	3	5	4	3	2	0	0	0	0	0	1	1	1	0	1	0	0	1	1	0	1	1	1	0	1	0	0	0	0	0	0	1	1	0	0	1	0	0	1	0	0
1	1	2	1	1	2	1	1	2	2	4	3	2	0	0	0	0	0	0	4	1	2	0	1	0	0	1	1	0	0	0	1	0	0	0	0	0	0	0	0	0	0	0	1	0	0	0	1	0	0
2	1	2	4	1	2	1	1	4	1	4	3	1	0	0	0	0	0	0	4	1	2	0	1	0	0	0	1	0	1	0	0	0	0	0	0	0	0	0	0	1	1	1	0	0	0	0	0	0	0
2	2	2	1	1	1	3	1	9	3	5	4	3	1	0	0	0	0	0	1	2	1	0	1	0	0	1	0	0	1	0	0	0	0	0	0	0	0	0	1	0	0	0	0	0	0	0	1	0	0
1	2	3	1	2	1	3	1	2	3	5	3	3	0	0	0	0	0	0	1	1	1	0	1	1	0	1	1	0	1	1	1	1	1	0	0	0	0	1	1	1	1	1	1	1	0	0	1	1	0
2	1	2	1	1	1	2	1	2	3	5	4	2	1	0	0	0	0	0	3	3	1	0	1	0	0	0	1	0	0	1	0	0	0	0	0	0	0	0	0	1	0	0	0	0	0	0	0	0	0
2	1	2	4	1	1	2	2	9	2	5	4	2	0	0	0	0	0	0	2	1	2	0	1	0	0	0	1	0	1	0	0	0	0	0	0	0	0	0	0	0	0	0	0	0	0	1	1	0	0
2	2	2	1	2	1	3	2	2	4	5	4	3	3	0	0	0	0	0	1	2	2	0	1	0	0	1	0	0	0	1	0	0	0	0	0	0	0	0	1	0	0	0	1	0	0	0	1	0	0
2	1	2	4	1	1	2	2	10	3	4	4	3	3	0	0	0	0	0	7	1	2	0	1	0	0	1	1	0	0	0	1	0	0	0	0	0	0	0	0	0	0	1	0	0	0	0	1	0	0
2	1	2	4	1	1	2	2	1	2	5	4	2	0	0	0	0	0	0	1	1	2	0	1	0	0	1	0	0	0	0	1	0	0	0	0	0	0	0	0	0	1	0	0	0	0	0	0	1	0
2	2	2	1	2	1	3	2	1	4	4	4	3	1	0	1	0	0	0	1	2	2	0	1	0	0	1	0	0	1	1	0	0	0	0	0	0	0	0	1	0	1	0	0	0	0	0	1	0	0
2	1	2	1	1	1	2	2	1	3	4	4	3	2	0	1	0	0	0	5	1	2	0	1	0	0	1	1	0	1	1	0	0	0	0	0	0	0	1	0	0	1	0	0	1	1	0	1	1	0
2	2	2	1	2	1	2	2	1	4	5	4	1	1	0	0	0	0	0	1	1	2	0	1	0	0	0	1	0	0	0	0	0	1	0	0	0	0	0	0	0	1	0	1	0	1	0	0	0	0
2	1	2	4	1	2	2	2	2	2	4	4	3	3	0	0	0	0	0	1	1	2	0	1	0	0	1	1	0	0	1	1	0	0	0	0	0	0	1	1	0	0	0	1	0	0	0	1	1	0
2	2	2	1	2	1	3	2	2	4	5	4	3	3	0	0	0	0	0	1	1	2	0	1	0	0	1	1	0	1	0	1	0	0	0	0	0	0	1	1	0	0	0	0	0	0	0	1	1	0
2	1	2	4	1	1	2	2	2	2	4	1	1	0	0	0	0	0	0	1	1	2	0	1	0	0	1	1	0	1	0	0	0	0	0	0	0	0	1	1	0	0	0	1	0	0	0	0	0	0
2	2	2	1	1	1	2	2	1	4	5	4	1	0	0	0	0	0	0	1	1	2	0	1	0	0	0	1	0	0	0	1	0	0	0	0	0	0	1	0	0	1	0	1	1	0	0	1	1	0
2	1	1	4	1	2	1	2	1	1	5	4	1	0	0	0	0	0	0	1	2	2	0	1	0	0	1	0	0	0	1	0	0	0	0	0	0	0	1	1	0	0	0	1	0	0	0	1	1	0
2	1	2	1	1	2	2	2	1	3	4	4	2	2	0	0	0	0	0	1	1	2	0	1	0	0	1	0	0	0	1	0	0	0	0	0	0	0	1	1	1	0	0	0	0	1	0	1	1	0
2	1	1	1	1	1	2	2	2	2	3	4	1	0	0	0	0	0	0	5	1	2	0	1	0	0	1	0	0	1	0	0	0	0	0	0	0	0	0	0	0	0	0	0	1	0	0	1	0	0
2	1	2	4	1	1	2	2	4	3	4	4	2	1	0	1	1	1	0	2	1	1	0	1	0	0	0	1	0	1	0	0	0	0	0	0	0	0	1	1	1	1	1	1	1	1	0	1	1	0
2	1	2	1	1	1	2	2	2	3	4	4	1	0	0	0	0	0	0	1	2	2	1	1	0	0	1	1	0	0	1	1	0	0	0	0	0	1	1	0	0	1	0	0	0	0	0	1	1	0
2	1	1	4	1	2	1	2	2	2	4	4	1	0	0	0	0	0	0	1	2	2	0	1	1	0	1	1	0	0	1	1	0	0	0	0	0	1	1	0	1	0	1	0	0	0	0	1	1	0
2	2	2	1	1	1	2	2	2	3	4	4	1	0	0	0	0	0	0	2	2	2	0	1	0	0	0	1	0	1	0	0	0	0	0	0	1	0	0	0	1	0	1	0	0	0	0	1	1	0
2	2	2	4	1	1	2	2	2	2	5	4	1	1	0	0	0	0	0	5	1	2	0	1	0	0	0	1	0	0	1	0	0	0	0	1	0	0	1	1	1	1	0	0	1	0	1	1	1	0
2	1	2	1	2	1	2	2	2	2	5	4	2	0	0	0	0	0	0	2	1	2	0	1	0	0	1	0	0	1	0	0	0	0	0	0	0	0	1	1	0	1	0	0	0	0	0	1	0	0
2	2	2	1	1	1	2	2	2	3	5	4	3	1	0	0	0	0	0	4	1	2	0	1	0	0	1	0	0	0	1	1	1	0	0	0	0	0	1	1	0	1	1	1	1	0	0	0	0	0
2	1	2	4	1	1	2	2	2	2	5	3	2	0	0	0	0	0	0	4	1	2	0	1	0	0	1	0	0	0	1	1	1	0	0	0	0	0	1	1	0	1	1	1	1	0	0	0	1	0
2	1	1	4	1	2	2	2	2	2	5	4	3	0	0	0	0	0	0	1	1	2	0	1	0	0	1	0	0	1	0	0	0	0	1	0	0	0	1	1	0	0	1	0	0	1	0	0	0	0
2	2	2	1	2	1	3	2	3	4	5	4	3	2	0	0	0	0	0	4	1	2	0	1	0	0	0	1	0	0	0	1	0	0	0	0	0	0	0	0	1	0	1	1	0	0	0	1	0	0
2	2	2	1	3	1	3	2	2	5	5	3	2	0	0	0	0	0	0	1	1	2	1	0	0	0	1	1	0	0	1	0	0	0	0	0	0	0	0	0	1	0	0	0	0	0	0	1	1	0
2	2	2	1	1	1	2	2	2	3	5	4	3	0	0	0	0	0	0	1	1	2	0	1	0	0	1	1	0	1	1	1	1	1	0	0	0	0	1	0	0	1	0	0	1	1	0	1	1	0
2	1	2	1	1	1	2	2	2	2	4	4	1	0	0	0	0	0	0	2	1	2	0	1	0	0	0	1	0	0	1	0	0	0	0	0	0	0	0	0	0	1	0	0	0	0	0	1	0	0
2	1	2	1	1	1	2	2	2	3	5	4	1	1	0	0	0	0	0	2	2	2	0	1	0	0	1	1	0	0	1	0	0	0	0	0	0	0	0	0	0	0	0	0	0	0	1	1	1	0
2	1	1	4	1	1	2	2	1	2	4	4	2	0	0	0	0	0	0	1	1	2	0	1	0	0	1	0	0	0	0	1	0	0	0	0	0	0	1	1	1	0	0	0	0	0	0	0	1	0
2	1	2	1	1	1	3	2	1	3	4	4	3	3	0	0	0	0	0	1	1	2	0	1	0	0	1	1	0	0	1	1	1	0	0	0	0	0	1	1	1	0	0	0	0	1	0	0	1	0
2	1	2	4	1	1	3	2	1	2	5	4	3	0	0	1	0	0	0	1	2	2	0	1	0	0	1	0	0	0	0	0	1	0	0	0	0	1	1	0	1	0	0	1	0	0	0	0	1	1
2	2	2	4	2	1	2	2	1	4	4	4	3	3	0	0	0	0	0	1	1	2	0	1	0	0	1	1	0	0	1	1	1	0	0	0	0	0	1	1	1	0	0	0	1	1	0	0	1	0
2	2	2	1	1	1	2	2	1	3	4	4	2	1	0	0	0	0	0	1	1	2	0	1	0	0	1	1	0	0	1	1	1	0	0	0	0	0	0	1	1	1	0	1	0	0	0	1	1	0
2	1	2	4	1	1	2	2	1	2	4	4	2	0	0	1	0	0	0	1	1	2	0	1	0	0	1	0	0	0	0	0	1	0	0	0	0	0	1	0	0	1	0	0	0	0	0	0	1	0
2	2	2	1	2	1	3	2	1	3	4	4	2	0	0	0	0	0	0	1	1	2	0	1	0	0	0	1	0	0	1	0	0	0	0	0	0	0	0	0	1	0	0	0	0	0	0	1	0	0
2	2	2	1	2	1	2	2	1	4	4	4	0	1	0	0	0	0	0	1	1	2	0	1	0	0	0	1	0	0	1	0	0	0	0	0	0	0	0	1	1	1	0	0	0	0	0	0	1	0
2	2	2	1	1	1	3	2	1	4	5	4	3	3	1	1	1	1	0	2	2	1	0	1	0	0	1	1	0	1	0	0	1	0	1	1	1	1	1	1	1	1	0	1	0	1	0	1	0	0
2	2	2	1	2	1	1	2	1	3	4	4	2	2	0	0	0	0	0	1	1	1	0	1	0	0	0	1	0	1	0	0	0	0	0	0	0	0	0	0	1	0	0	0	0	0	0	0	1	0
2	2	2	1	1	1	2	2	1	3	4	4	3	3	0	1	0	0	0	1	1	2	0	1	0	0	0	1	0	0	0	0	1	0	0	0	0	0	0	0	1	0	0	0	0	0	0	1	1	0
2	1	2	1	1	1	2	2	1	3	4	4	3	0	0	1	0	0	0	1	1	2	0	1	0	0	1	0	0	0	0	1	0	0	0	0	0	0	1	0	0	0	0	1	0	0	0	0	1	0
2	1	2	4	1	1	2	2	1	2	4	4	3	3	0	0	0	0	0	4	1	2	0	1	0	0	1	1	0	1	0	0	0	1	0	1	0	0	1	1	0	0	0	0	0	0	0	1	0	0
2	1	1	4	1	2	2	2	1	2	4	3	2	0	0	0	0	0	0	1	1	2	0	1	0	0	0	1	0	1	0	0	0	0	0	0	0	0	1	1	0	0	1	1	1	0	0	1	1	0
1	1	2	1	1	1	1	3	10	3	5	4	3	3	0	2	1	0	0	7	2	1	1	1	0	0	1	1	0	0	1	0	0	0	0	0	0	1	0	0	1	0	0	1	1	0	0	0	0	0
2	1	2	4	1	1	1	1	10	2	5	4	1	0	0	0	0	0	0	1	3	2	0	1	0	0	1	0	1	1	1	1	0	0	1	0	0	0	1	0	0	0	1	1	1	1	0	0	1	0
2	3	2	1	2	1	2	1	3	3	5	4	0	1	0	0	0	0	0	2	3	1	0	0	1	0	0	1	0	0	0	1	1	0	0	0	1	0	0	0	0	0	1	0	0	0	0	1	0	0
2	2	2	1	1	1	2	2	2	4	5	4	2	0	0	0	0	0	0	2	1	1	0	1	0	0	0	1	0	1	0	0	0	0	0	0	0	0	1	0	0	1	1	0	0	0	0	0	1	0
2	1	2	4	1	2	2	2	2	3	4	4	1	0	0	0	0	0	0	2	1	2	0	1	1	0	1	1	0	1	1	1	0	0	0	0	0	0	1	0	1	1	1	0	1	1	0	0	1	0
2	3	2	1	3	1	2	2	2	5	5	4	2	2	0	0	0	0	0	2	1	2	0	1	1	0	1	1	0	1	1	1	0	0	0	0	0	0	1	1	1	1	1	1	1	1	0	1	1	0
2	1	1	1	1	2	2	2	2	3	4	4	1	1	0	0	0	0	0	2	2	2	0	1	0	0	1	1	0	0	1	1	1	0	0	0	0	0	1	1	1	1	1	1	1	0	0	1	1	0
2	1	3	1	1	1	1	1	2	2	5	4	3	3	0	0	0	0	0	4	2	1	0	1	0	0	1	1	0	1	0	0	0	0	0	0	0	0	1	0	1	0	0	0	0	0	1	0	0	0
2	1	3	4	1	1	1	1	2	2	5	3	1	0	0	1	0	0	0	2	2	1	0	1	0	0	1	0	0	0	1	0	0	0	0	0	0	0	1	0	0	0	0	0	0	0	0	1	1	0
2	2	1	4	1	1	2	2	2	4	4	4	2	2	0	0	0	0	0	2	1	2	0	1	1	0	1	1	0	0	1	1	1	0	0	0	0	0	1	1	1	1	1	1	1	1	0	1	1	0
2	1	2	4	1	2	1	2	2	2	4	4	2	1	0	0	0	0	0	2	2	2	0	1	0	0	1	1	0	1	0	0	0	0	0	0	0	0	1	1	1	1	1	1	1	1	0	1	1	0
2	1	3	1	1	1	2	1	4	2	5	4	2	1	0	0	0	0	0	2	1	2	0	1	0	0	1	0	0	0	1	0	0	0	0	0	0	0	1	1	1	0	0	1	0	0	0	1	1	0
2	2	3	1	1	1	2	1	2	2	5	4	1	1	0	0	0	0	0	2	1	2	0	1	0	0	1	0	0	0	1	0	0	0	0	0	0	0	0	0	1	0	0	0	0	0	1	0	1	0
2	1	2	4	1	2	2	2	2	3	5	4	2	0	0	0	0	0	0	2	2	2	0	1	0	0	0	1	0	1	0	0	0	0	0	0	0	1	1	0	0	0	0	1	1	1	0	0	1	0
2	1	2	1	2	2	1	2	2	3	5	4	1	1	0	0	0	0	0	2	1	1	0	1	0	0	1	0	0	1	0	0	0	0	0	0	0	0	1	0	0	0	1	1	0	0	0	1	0	0
2	1	2	4	1	1	1	2	2	1	4	4	1	0	0	0	0	0	0	2	1	2	0	1	0	0	1	0	0	0	1	0	0	0	0	0	0	1	1	0	0	0	0	1	0	0	0	1	0	0
1	1	3	1	1	1	1	1	9	2	4	4	3	2	0	0	0	0	0	1	1	2	0	1	0	0	1	1	0	0	1	0	1	0	0	0	0	0	0	1	0	0	0	1	1	0	0	1	1	0
2	3	2	1	3	1	3	1	9	5	5	4	1	0	0	0	0	0	0	1	1	2	0	1	0	0	0	1	0	0	1	0	0	0	0	0	0	0	0	0	1	0	0	0	0	0	0	1	0	0
2	2	3	1	2	1	2	1	9	3	5	4	3	0	0	0	0	0	0	1	1	2	0	1	1	0	1	1	0	0	1	1	0	0	0	0	0	1	1	1	1	1	0	1	1	1	0	1	1	0
2	3	2	1	3	1	2	1	9	4	5	4	3	1	0	0	0	0	0	2	1	1	1	0	0	0	1	0	0	1	0	0	0	0	0	0	0	0	0	0	0	0	0	0	0	1	0	0	0	0
2	2	2	1	3	1	2	2	3	5	5	4	1	1	0	0	0	0	0	2	1	2	0	1	0	0	1	0	0	0	1	0	0	0	0	0	0	0	0	0	0	1	1	0	0	0	0	0	0	0
2	2	3	4	1	1	2	1	9	2	5	4	3	2	0	0	0	0	0	2	1	2	0	1	0	0	1	1	0	0	1	0	0	0	0	0	1	0	1	0	0	0	0	0	0	0	0	0	0	0
2	1	3	1	1	1	1	1	9	2	5	4	3	0	0	0	0	0	0	2	1	2	0	1	0	0	1	1	0	1	1	0	0	0	0	0	0	0	0	0	1	0	0	1	0	0	0	0	1	0
2	1	1	1	1	2	2	2	3	3	4	4	2	1	0	0	0	0	0	4	1	2	0	1	0	0	1	0	0	0	0	0	1	0	0	0	0	0	0	0	1	0	0	0	1	0	0	0	1	0
2	1	2	4	1	2	1	2	3	1	4	4	2	1	0	0	0	0	0	2	1	2	0	1	0	0	1	1	0	1	0	0	0	0	0	0	0	0	1	0	1	1	0	1	1	0	0	0	1	0
2	1	2	4	1	2	1	2	3	1	4	4	2	1	0	0	0	0	0	2	1	1	0	1	1	0	1	1	0	1	0	0	0	0	0	0	0	0	1	0	1	0	0	1	1	0	0	1	1	0
2	1	1	4	1	2	2	2	3	2	5	4	3	3	0	0	0	0	0	2	1	1	0	1	0	0	1	1	0	1	0	0	0	0	0	0	0	0	1	1	1	1	0	1	1	0	0	1	1	0
2	1	1	4	1	2	1	2	3	3	3	4	3	2	0	0	3	0	0	5	1	2	0	1	0	0	1	1	0	1	1	1	0	0	0	0	0	0	1	0	0	1	0	0	1	1	0	1	0	0
2	2	2	1	2	1	3	2	3	4	5	4	1	0	0	0	0	0	0	2	1	2	0	1	0	0	1	0	0	0	0	1	0	0	0	0	0	0	1	0	0	0	0	0	0	0	0	0	0	0
1	3	2	1	3	1	2	1	3	4	5	2	1	1	0	0	0	0	0	2	2	2	0	1	0	0	0	1	0	1	0	0	0	0	0	0	0	0	1	0	0	0	0	0	0	0	0	1	0	0
1	1	3	4	1	1	2	1	3	2	5	4	1	1	0	0	0	0	0	2	2	2	0	1	0	0	1	0	0	1	1	0	0	0	0	0	0	1	1	0	0	0	0	0	0	0	0	1	0	0
2	1	3	1	1	1	1	1	2	2	5	2	1	0	0	0	0	0	0	3	1	1	0	1	0	0	1	0	0	1	1	0	0	0	0	0	0	0	1	0	1	0	0	0	0	0	0	1	1	0
1	2	2	1	2	1	3	1	2	4	5	4	2	0	0	0	0	0	0	1	1	1	0	1	0	0	1	1	0	1	1	0	1	0	0	0	0	1	1	0	1	1	1	0	1	1	0	1	1	0
2	2	3	1	1	1	1	1	2	3	5	2	1	0	0	0	0	0	0	3	1	2	0	1	0	0	1	0	0	1	1	0	0	0	0	0	0	0	1	0	1	0	0	0	0	0	0	1	1	0
2	1	3	1	1	1	1	1	2	2	5	4	0	1	0	0	0	0	0	2	1	1	0	1	0	0	0	1	0	0	0	0	1	0	0	0	0	0	0	0	0	1	0	1	0	0	0	0	1	0
2	1	3	4	1	2	1	1	2	2	5	4	2	1	0	0	0	0	0	4	1	2	0	1	0	0	1	1	1	0	1	1	0	0	0	0	0	0	0	1	1	0	1	1	1	0	0	1	1	0
2	1	1	1	1	1	2	2	2	3	4	4	1	0	0	0	0	0	0	2	1	1	0	1	0	0	0	1	0	0	1	0	0	0	0	0	0	0	1	1	1	1	1	1	1	0	0	1	1	0
2	1	2	4	1	2	2	2	2	2	4	3	2	0	0	0	0	0	0	2	1	2	0	1	0	0	1	1	0	1	1	0	0	0	0	0	0	0	1	0	1	0	0	0	0	0	0	1	1	0
2	3	2	1	3	1	2	2	2	4	5	4	1	0	0	0	0	0	0	1	1	1	0	1	0	0	1	0	0	1	0	0	0	0	0	0	0	1	0	0	0	0	0	0	0	0	0	0	1	0
2	1	2	4	1	1	1	2	4	2	5	4	1	0	0	0	0	0	0	4	2	1	0	1	0	0	1	0	0	0	1	0	0	0	0	0	0	0	0	0	0	0	1	0	0	0	0	0	0	0
2	1	3	1	1	1	1	1	4	2	4	4	0	2	0	0	0	0	0	1	1	2	0	1	1	0	1	1	1	1	1	1	1	1	0	0	0	0	1	1	1	1	1	1	1	0	0	1	1	0
2	2	3	1	2	1	2	1	4	3	5	4	3	0	0	0	0	0	0	1	1	1	0	1	0	0	0	1	0	1	1	0	0	0	0	0	0	0	0	0	0	1	0	1	0	0	0	1	0	0
2	2	3	4	1	1	2	1	4	2	5	4	2	2	0	0	0	0	0	2	1	2	0	1	0	0	1	0	0	0	1	0	0	0	0	0	0	0	0	0	1	1	0	0	1	1	0	1	0	0
1	1	3	4	1	2	2	1	2	2	5	4	3	0	0	0	0	0	0	2	1	1	0	1	0	0	1	0	0	0	0	1	0	0	0	0	0	0	0	0	0	1	0	0	0	0	0	0	1	0
2	2	2	1	1	1	2	2	4	3	4	4	1	0	0	0	0	0	0	4	1	2	0	1	0	0	1	0	0	0	0	1	0	0	0	0	0	0	0	0	1	0	0	0	0	0	0	1	0	0
2	2	3	1	1	1	1	1	2	2	5	4	3	3	0	1	0	0	0	2	1	2	0	1	0	0	1	1	0	0	1	1	0	0	0	0	0	0	0	0	1	1	1	1	1	1	0	1	0	0
2	1	3	4	1	1	1	1	2	1	5	4	3	3	0	2	1	0	0	3	1	2	0	1	0	0	1	0	0	1	0	0	0	0	0	0	0	0	1	0	1	1	1	1	1	1	0	1	1	0
2	1	3	4	1	1	1	1	2	1	5	4	3	2	0	0	0	0	0	3	1	2	0	1	0	0	1	0	0	0	0	1	0	0	0	0	0	0	1	0	1	0	0	0	1	0	0	1	1	0
2	1	3	4	1	1	1	1	2	2	5	4	3	1	0	0	0	0	0	2	1	2	0	1	0	0	1	0	0	1	0	0	0	0	0	0	0	0	1	0	0	1	0	0	1	1	0	1	0	0
1	2	3	1	2	1	2	1	2	3	5	4	3	2	0	0	0	0	0	3	1	2	0	1	0	0	1	0	0	1	0	0	0	0	0	0	0	1	1	0	0	0	0	0	0	0	0	0	1	0
2	2	2	1	1	1	2	2	2	3	4	3	2	0	0	0	0	0	0	2	1	2	0	1	1	0	1	1	0	1	0	0	0	0	0	0	0	0	1	0	0	1	0	1	1	0	0	0	1	0
2	1	2	1	1	1	2	2	2	3	4	4	2	1	0	0	0	0	0	2	1	2	0	1	0	0	1	0	0	1	0	0	0	0	0	0	0	0	1	0	0	1	0	0	0	0	0	0	1	0
2	3	2	1	2	1	3	2	2	5	5	4	1	0	0	0	0	0	0	2	1	2	0	1	0	0	0	1	0	0	1	0	0	0	0	0	0	0	0	0	1	1	1	0	0	0	0	0	1	0
2	1	2	1	1	2	1	2	2	2	5	4	2	0	0	0	0	0	0	2	2	2	0	1	0	0	1	0	0	0	1	0	0	0	0	0	1	0	0	0	0	0	0	0	1	0	0	0	1	0
1	2	3	4	1	1	2	1	2	2	5	4	1	1	0	0	0	0	0	3	1	2	0	1	0	0	0	1	0	0	1	0	0	0	0	0	0	0	0	1	1	1	1	0	0	0	0	1	1	0
2	1	3	4	1	1	1	1	2	1	5	4	2	2	0	0	0	0	0	2	1	1	0	1	1	0	1	1	1	1	1	0	0	0	0	0	0	0	1	0	1	1	0	0	0	0	0	1	1	0
2	1	3	4	1	1	2	1	2	2	5	4	3	2	0	0	0	0	0	3	1	1	0	1	1	0	1	1	1	1	1	1	0	0	0	0	0	0	1	1	1	1	1	1	1	1	0	1	1	0
1	3	3	1	3	1	1	1	2	5	5	4	3	3	0	1	0	0	0	2	2	2	0	0	1	0	1	1	0	1	0	0	0	1	0	0	0	0	0	1	0	1	1	0	1	0	0	1	1	0
1	2	3	1	2	1	2	1	2	3	5	4	3	2	0	1	0	0	0	3	1	1	0	1	0	0	1	1	0	1	1	0	0	0	0	0	0	1	1	1	1	1	1	1	1	1	0	1	0	0
2	3	2	1	3	1	2	2	2	5	5	4	1	0	0	0	0	0	0	2	1	2	0	1	0	0	1	0	0	1	0	0	0	0	0	0	0	1	1	0	0	1	0	0	0	0	0	0	1	0
2	2	2	4	1	2	1	2	2	3	4	4	3	0	0	0	0	0	0	2	1	1	0	1	0	0	1	1	0	0	0	1	0	0	0	0	0	0	1	0	0	1	0	0	1	0	0	0	1	0
2	1	2	4	1	2	1	2	3	3	5	4	0	2	0	0	0	0	0	2	2	1	0	1	0	0	1	0	0	0	1	1	0	0	0	0	0	0	1	1	1	1	1	0	1	0	0	0	1	0
2	1	2	1	2	1	1	2	9	3	4	4	2	2	0	0	0	0	0	1	1	2	0	1	0	0	1	1	0	1	1	0	0	0	0	0	0	0	0	0	1	0	0	0	0	0	0	1	1	0
2	1	3	1	1	1	2	1	2	2	5	2	3	2	0	0	0	0	0	2	1	2	0	1	0	0	1	1	0	0	1	1	1	1	0	0	0	0	1	0	1	1	0	0	0	0	0	0	1	0
2	3	2	1	3	1	2	1	2	5	5	4	1	1	0	0	0	0	0	1	1	1	0	1	0	0	0	1	0	0	1	0	0	0	0	0	0	0	0	0	0	1	0	0	0	0	0	1	0	0
2	1	2	1	1	2	2	2	2	3	4	4	1	1	0	0	0	0	0	1	1	2	0	1	0	0	1	0	0	0	1	0	0	0	0	0	0	0	1	0	0	0	0	0	0	0	0	1	0	0
2	1	2	4	1	1	2	2	2	2	5	4	2	1	0	0	0	0	0	2	2	2	0	1	0	0	0	1	0	0	1	0	0	0	0	0	0	0	0	0	1	0	0	0	0	0	0	1	0	0
2	3	2	1	3	1	2	2	9	5	5	4	3	3	0	0	0	0	0	2	1	1	0	1	1	0	1	1	0	1	1	1	0	0	0	0	0	0	1	0	1	1	1	1	1	0	0	1	1	0
2	1	2	4	1	2	1	2	2	1	4	3	1	0	0	0	0	0	0	1	1	2	0	1	0	0	1	0	0	0	1	0	0	0	0	0	0	0	1	1	0	0	0	0	0	0	0	0	1	0
2	1	3	1	1	1	2	1	2	2	5	4	1	0	0	0	0	0	0	3	2	1	0	1	0	0	0	1	0	0	0	0	1	0	0	0	0	0	0	0	0	0	0	0	0	0	1	1	0	0
2	1	2	4	1	2	1	2	2	3	5	4	3	1	0	0	0	0	0	2	1	1	0	1	0	0	0	1	0	0	0	1	0	0	0	0	0	0	1	0	1	1	0	0	0	0	0	1	0	0
2	1	2	1	1	1	1	2	2	3	5	4	1	0	0	0	0	0	0	5	1	2	0	1	0	0	0	1	0	0	0	0	1	0	0	0	0	0	0	0	0	0	0	0	0	0	1	0	1	0
2	1	1	4	1	2	2	2	3	2	4	3	1	1	0	0	0	0	0	2	1	2	0	1	0	0	1	1	0	1	1	0	0	0	1	0	0	0	1	0	1	1	0	0	0	1	0	0	1	0
2	1	2	1	1	1	1	2	3	3	4	4	3	0	0	0	0	0	0	2	1	2	0	1	0	0	1	1	0	1	0	0	0	0	0	0	1	0	1	1	0	0	0	0	1	0	0	0	0	0
2	1	2	1	1	2	2	2	3	3	4	4	2	0	0	0	0	0	0	7	1	2	0	1	0	0	1	0	0	1	0	0	0	0	0	0	0	0	0	0	0	1	1	0	0	0	0	1	1	0
2	2	2	1	1	1	2	2	3	3	4	4	2	0	0	1	0	0	0	2	1	2	0	1	0	0	1	0	0	1	0	0	0	0	0	0	0	0	1	0	1	1	0	0	0	0	0	1	0	0
2	1	2	1	1	1	2	2	3	3	4	4	2	0	0	0	0	0	0	2	1	2	0	1	0	0	1	1	0	0	1	1	0	0	0	0	0	0	0	1	1	0	0	1	0	1	0	1	1	0
2	2	2	1	2	1	1	2	3	4	5	4	2	0	0	0	0	0	0	2	1	2	0	1	0	0	1	1	0	1	0	0	0	0	0	0	0	0	1	0	1	1	0	0	0	1	0	1	0	0
2	2	2	1	2	1	2	1	3	4	5	3	1	0	0	0	0	0	0	3	1	2	0	1	0	0	1	0	0	0	0	1	0	0	0	0	0	0	0	0	0	1	0	0	0	0	0	0	0	0
1	2	3	1	2	1	2	1	3	3	5	4	3	0	0	0	0	0	0	1	1	2	1	0	0	0	1	0	0	1	0	0	0	0	0	0	0	0	1	0	0	0	0	1	1	0	0	0	1	0
1	2	3	1	2	1	2	1	3	3	5	4	3	1	0	2	0	0	0	1	2	1	0	1	1	0	1	0	1	1	1	0	1	0	0	0	0	1	1	1	0	0	0	1	1	1	0	1	1	0
2	1	2	1	1	1	1	2	3	3	4	1	3	3	0	0	0	0	0	1	1	2	0	1	0	0	1	1	0	1	1	0	0	0	0	0	0	0	1	1	0	1	0	1	1	1	0	1	1	0
2	1	2	1	1	1	1	2	3	3	4	1	3	3	0	0	0	0	0	1	1	2	0	1	0	0	1	1	0	1	1	0	0	0	0	0	0	0	1	1	0	1	0	1	0	1	0	1	1	0
2	3	2	1	2	1	1	2	3	5	5	4	3	2	0	0	0	0	0	4	1	2	0	1	0	0	1	0	0	0	1	0	0	0	0	0	0	0	1	0	0	1	0	0	0	1	0	1	1	0
2	1	2	4	1	1	2	2	3	3	4	4	1	2	0	0	0	0	0	4	1	2	0	1	0	0	1	1	0	1	1	0	0	0	0	0	0	0	1	1	1	1	1	1	0	0	0	1	1	0
2	2	2	1	1	1	2	2	9	4	4	4	1	0	0	0	0	0	0	1	1	1	0	1	0	0	1	0	0	0	0	0	1	0	0	0	0	0	0	0	1	0	0	0	0	0	0	1	0	0
2	2	2	1	1	1	2	2	3	3	5	4	1	0	0	0	0	0	0	1	1	1	0	1	0	0	1	0	0	1	0	0	0	0	0	0	0	0	1	1	0	1	0	1	0	0	0	1	0	0
2	1	2	4	1	1	2	2	3	2	5	4	1	1	0	0	0	0	0	2	2	2	0	1	0	0	0	1	0	1	0	0	0	0	0	0	0	0	1	0	0	1	0	0	0	1	0	0	1	0
1	1	3	4	1	1	2	1	2	2	5	2	1	2	0	0	0	0	0	2	3	2	0	1	0	0	1	1	0	1	1	1	0	0	0	1	0	0	0	0	0	1	0	0	1	1	0	1	0	0
2	2	3	1	2	1	2	1	1	2	5	4	1	0	0	0	0	0	0	2	1	1	0	1	0	0	1	0	0	1	0	0	0	0	0	0	0	0	1	0	0	1	0	0	1	0	0	0	1	0
2	1	3	4	1	1	2	1	1	2	5	2	2	1	0	0	0	0	0	2	1	2	0	1	0	0	1	1	0	1	1	1	1	0	0	1	0	0	1	0	1	1	0	0	1	1	0	1	1	0
2	2	2	1	1	1	1	2	1	4	4	4	3	3	0	0	0	0	0	2	1	2	0	1	1	1	1	1	1	1	1	1	1	1	0	0	0	0	1	1	1	1	1	1	1	1	0	1	0	0
2	2	2	1	1	1	1	2	1	4	4	4	2	3	0	1	0	0	0	4	2	2	0	1	0	0	1	1	0	1	1	1	1	1	1	1	1	1	1	1	1	1	1	1	1	1	0	1	1	0
2	1	2	1	2	1	1	2	1	3	5	4	3	3	0	0	0	0	0	1	1	2	1	1	0	0	1	1	0	1	1	1	1	1	0	0	0	0	0	1	0	1	1	1	1	1	0	1	0	0
2	1	1	4	1	2	1	2	1	2	5	4	2	0	0	0	0	0	0	7	1	2	0	1	0	0	0	1	0	0	1	1	1	0	0	0	0	1	1	0	0	1	0	0	1	0	0	1	1	0
2	1	2	4	1	1	1	2	1	2	4	4	1	0	0	0	0	0	0	1	2	2	0	1	0	0	1	0	0	0	1	0	0	0	0	0	0	0	1	1	1	1	1	1	1	1	0	1	1	0
2	1	2	4	1	1	2	2	1	2	5	4	1	1	0	0	0	0	0	4	2	2	0	1	0	0	1	0	0	1	0	0	0	0	0	0	0	0	0	0	0	0	1	1	0	0	0	1	1	0
2	1	3	4	1	2	1	1	1	1	5	4	1	1	0	0	0	0	0	2	1	1	0	0	0	1	1	0	0	0	0	1	0	0	0	0	0	0	0	0	0	0	0	0	0	0	1	1	1	0
2	2	3	1	1	2	1	1	1	2	5	4	1	1	0	1	0	0	0	2	1	1	0	1	0	0	1	1	0	0	1	0	0	0	0	0	0	0	0	1	1	1	1	0	1	1	0	1	1	0
1	1	2	4	1	1	2	2	1	2	4	4	3	3	0	0	1	0	0	1	2	2	0	1	0	0	1	0	0	0	0	1	0	0	0	0	0	1	0	0	1	1	0	1	1	1	0	1	1	0
2	2	2	1	2	1	3	2	1	3	5	3	3	0	0	0	0	0	0	1	2	2	0	1	0	0	1	0	0	1	0	0	0	0	0	0	0	0	1	0	1	0	0	0	0	0	0	1	0	0
2	3	2	1	1	2	2	2	1	4	4	4	3	3	0	3	3	3	0	4	2	2	0	1	0	0	1	0	0	1	0	0	0	0	1	0	0	1	0	1	0	1	0	0	1	0	0	1	0	0
2	1	1	4	1	2	2	2	1	2	5	4	1	0	0	0	0	0	0	1	2	2	0	1	0	0	1	0	0	0	1	0	0	0	0	0	0	0	1	1	0	0	0	1	0	0	0	0	1	0
2	1	2	4	1	2	2	2	1	2	4	2	1	0	0	0	0	0	0	1	1	2	0	1	0	0	1	0	0	0	1	0	0	0	0	0	0	0	1	1	0	1	1	0	0	0	0	1	1	0
1	1	2	4	1	1	1	2	1	2	4	4	3	3	0	1	0	0	0	1	2	2	0	1	0	0	1	1	0	1	1	0	0	0	0	0	0	0	1	1	1	0	0	0	0	0	0	0	1	0
1	1	2	4	1	1	1	2	1	1	4	2	1	0	0	0	0	0	0	1	2	2	0	1	0	0	1	1	0	1	1	0	0	0	0	0	0	0	1	0	1	0	0	1	0	0	0	0	0	0
2	1	1	4	1	2	1	2	1	1	4	4	1	0	0	0	0	0	0	1	1	2	0	1	0	0	1	1	0	1	1	0	0	0	0	0	0	0	1	1	0	0	0	0	0	0	0	1	0	0
1	2	3	1	1	1	3	1	3	3	5	2	1	0	0	0	0	0	0	3	1	2	0	1	0	0	0	1	0	1	0	0	0	0	0	0	0	0	0	0	0	1	0	0	0	0	0	0	1	0
1	2	3	1	1	2	1	1	3	2	5	4	2	1	0	1	1	1	1	1	2	1	0	1	0	0	1	1	0	1	0	0	0	0	0	1	0	0	0	0	0	0	0	0	0	0	0	0	1	1
1	3	2	1	3	1	2	1	3	4	5	4	1	0	0	0	0	0	0	3	2	1	0	1	0	0	1	0	0	1	0	0	0	0	0	0	0	1	0	0	0	0	0	1	0	1	0	0	1	0
2	1	2	1	1	1	2	2	3	3	5	4	2	0	0	0	0	0	0	2	2	2	0	1	0	0	1	1	0	0	1	0	0	0	0	0	0	0	1	1	1	1	0	1	1	0	0	1	1	0
2	2	2	4	1	1	2	2	3	4	5	4	2	0	0	0	0	0	0	2	1	1	0	1	0	0	1	1	0	1	0	0	1	0	0	0	0	0	0	0	0	1	0	1	1	1	0	1	1	0
2	2	2	1	1	1	2	2	6	3	5	1	3	0	0	0	0	0	0	2	1	2	0	1	1	0	1	1	0	1	1	1	1	0	0	0	0	0	0	0	0	0	0	0	1	1	0	1	1	0
2	2	2	1	2	1	2	1	6	3	5	4	1	0	0	0	0	0	0	3	1	2	0	1	0	0	1	1	0	1	1	0	0	0	0	0	0	0	0	1	0	1	0	0	0	0	0	0	1	0
2	1	2	1	1	1	3	1	6	2	5	3	1	1	0	0	0	0	0	2	3	2	0	1	0	0	1	0	0	0	1	0	0	0	0	0	0	0	0	0	1	0	0	0	0	1	0	0	1	0
2	1	3	1	1	1	2	1	6	2	5	3	1	2	0	0	0	0	0	3	2	2	0	1	0	0	1	1	0	0	1	1	0	0	0	0	0	0	1	1	1	0	1	1	1	0	0	0	0	0
2	1	3	1	1	1	1	1	6	2	5	3	3	2	0	0	0	0	0	2	3	2	0	1	0	0	1	1	1	0	0	0	1	0	0	0	0	0	1	0	0	0	0	0	0	1	1	1	1	0
2	1	3	4	1	1	1	1	6	2	5	4	3	0	0	0	0	0	0	2	1	1	0	1	0	0	1	1	0	0	1	0	0	0	0	0	0	0	0	0	1	0	0	0	0	0	0	0	1	0
2	1	3	4	1	2	1	1	6	2	5	4	1	1	0	0	0	0	0	3	2	1	0	1	0	0	1	0	0	0	0	0	1	0	1	1	0	1	1	0	1	0	0	0	0	1	0	0	1	0
2	2	3	1	2	1	1	1	6	3	5	3	2	1	0	0	0	0	0	2	2	2	0	1	1	0	1	1	0	1	1	1	1	0	0	0	0	0	0	0	1	0	0	0	0	0	0	1	1	0
2	2	2	1	1	1	2	2	2	3	4	4	2	1	0	0	0	0	0	2	1	1	0	1	0	0	1	0	0	1	0	1	0	0	0	0	0	0	1	1	1	0	1	0	1	0	0	1	0	0
2	2	3	1	2	1	3	1	2	3	5	4	3	0	0	0	0	0	0	1	2	1	0	1	0	0	1	1	0	1	1	0	1	0	0	0	0	0	0	1	1	0	0	1	1	0	0	1	0	0
2	2	3	1	2	1	2	1	2	2	5	4	1	0	0	0	0	0	0	2	1	2	0	1	0	0	1	1	0	0	1	0	1	0	0	0	0	0	0	0	0	1	0	0	0	0	0	0	1	0
2	1	1	4	1	2	1	2	2	2	5	4	2	0	0	0	0	0	0	2	2	1	0	1	0	0	0	1	0	1	0	0	0	0	0	0	0	0	0	0	0	0	0	0	0	0	1	0	1	0
2	1	3	4	1	1	2	1	6	2	5	3	3	0	0	0	0	0	0	1	2	2	0	1	0	0	1	0	0	0	1	0	0	0	0	0	0	0	1	1	1	1	0	1	0	1	0	1	1	0
2	1	2	1	1	2	2	2	2	3	4	4	1	0	0	0	1	0	0	4	1	1	0	1	0	0	1	0	0	0	0	0	1	0	0	0	0	0	0	0	1	0	0	0	0	0	0	0	0	0
2	1	2	1	1	2	2	2	2	2	4	4	0	0	0	0	1	0	0	4	1	2	0	1	0	0	1	1	0	0	1	0	1	0	1	0	0	0	0	1	1	1	1	0	1	1	0	0	0	0
1	2	3	1	3	1	2	1	2	4	5	3	3	3	0	0	0	0	0	2	2	2	0	1	0	0	1	0	0	1	0	0	0	0	0	0	0	0	0	0	0	1	0	0	0	0	0	0	0	0
2	2	2	1	2	2	1	2	4	4	4	3	3	2	0	2	1	0	0	2	2	2	0	1	0	0	1	0	0	0	0	1	1	0	0	0	0	0	0	0	1	0	0	0	0	0	0	0	0	0
2	1	2	4	1	2	1	2	2	1	4	4	1	0	0	0	1	0	0	2	1	2	0	0	0	1	1	1	0	1	0	0	0	0	0	0	0	1	1	0	0	0	0	0	0	0	0	1	0	0
2	3	1	1	2	1	3	2	2	5	4	4	2	0	0	0	0	0	0	4	1	2	0	0	1	0	1	0	0	0	1	0	0	0	0	0	0	0	1	0	0	0	0	0	0	0	0	0	1	0
1	2	3	1	1	1	2	1	2	2	5	2	1	2	0	0	0	0	0	2	1	2	0	1	0	0	1	1	0	0	0	0	1	0	1	0	0	0	1	0	0	1	0	0	1	0	0	0	1	0
1	1	2	1	1	1	2	1	2	3	5	4	3	3	0	0	0	0	0	2	1	2	0	1	0	0	1	0	0	1	1	0	0	0	0	0	0	0	1	0	0	1	1	0	1	1	0	1	1	0
1	6	2	1	3	1	3	1	2	5	4	4	3	3	0	2	0	0	0	1	1	1	0	1	0	0	1	0	0	0	1	0	0	0	0	0	0	0	1	1	0	1	0	0	0	0	0	0	1	0
2	1	2	1	1	2	2	2	2	3	4	4	1	0	0	0	0	0	0	2	2	1	0	1	0	0	1	0	0	0	1	0	0	0	0	0	0	0	0	0	1	0	0	0	0	0	0	0	0	0
2	3	2	1	3	1	3	2	9	5	5	2	1	1	0	0	1	0	0	1	1	2	0	1	0	0	0	1	0	0	1	0	0	0	0	0	0	0	0	1	0	0	0	0	0	0	0	0	1	0
1	6	3	1	3	1	2	1	1	5	5	4	1	0	0	0	0	0	0	7	2	2	0	1	0	0	1	1	0	0	1	0	0	1	0	0	0	0	0	0	1	0	0	0	0	1	1	1	1	0
1	3	2	1	2	1	2	3	2	3	5	1	2	0	0	1	1	0	0	1	1	2	0	1	0	0	1	0	0	0	0	1	0	0	0	0	0	0	1	0	0	1	0	0	0	0	0	0	1	0
2	2	2	1	2	1	3	2	2	4	5	2	3	3	0	0	0	0	0	4	1	2	0	0	1	0	1	1	0	0	1	1	1	0	0	0	0	0	1	1	1	1	1	1	1	1	0	1	1	0
2	2	2	1	2	1	3	2	2	4	5	2	3	3	0	0	0	0	0	4	1	2	0	1	1	0	1	1	0	0	1	1	0	0	0	0	0	0	0	0	1	1	1	1	1	1	0	1	1	0
1	3	2	1	3	1	3	1	4	4	5	3	3	2	0	1	0	0	0	1	1	2	0	1	0	0	1	0	0	1	0	0	0	0	1	0	0	0	0	0	0	1	0	0	1	1	0	1	1	0
2	6	3	1	3	1	3	1	2	5	5	4	1	0	0	0	0	0	0	1	1	2	0	1	0	0	0	1	0	0	1	0	0	0	0	0	0	0	0	0	0	1	0	0	0	0	0	0	1	0
2	6	2	1	3	1	3	1	6	5	4	4	2	1	0	0	0	0	0	1	1	1	0	1	0	0	1	1	0	1	1	0	0	0	0	0	0	1	1	1	0	0	0	0	0	0	0	0	0	0
1	3	2	1	3	1	3	1	6	5	5	2	2	0	0	0	0	0	0	7	1	2	0	1	0	0	1	1	0	0	1	0	0	0	0	0	0	0	1	1	0	0	1	0	0	1	0	0	1	0
2	6	2	1	3	1	3	1	9	5	4	2	1	0	0	0	0	0	0	3	1	2	0	1	0	0	1	0	0	0	1	0	0	0	0	0	0	0	0	0	0	0	0	0	0	0	1	0	1	0
1	3	2	1	3	1	3	1	3	5	5	4	3	3	0	0	0	0	0	2	1	2	0	1	0	0	1	1	0	1	1	0	0	0	0	0	0	0	1	0	1	0	0	0	0	0	0	1	0	0
1	6	3	1	3	1	3	1	2	5	5	2	3	3	0	0	0	0	0	1	1	1	0	1	0	0	1	1	0	0	1	0	0	0	0	0	0	0	0	1	1	0	0	1	0	0	0	1	0	0
1	3	3	1	3	1	3	1	3	3	5	4	1	0	0	1	0	0	0	1	1	1	0	1	0	0	0	1	0	0	1	0	0	0	0	0	0	0	0	1	1	0	0	1	0	0	0	1	1	0
2	2	2	1	2	1	3	2	2	4	4	4	3	0	0	0	0	0	0	2	1	1	0	1	0	0	1	0	0	1	0	0	0	0	0	0	0	0	1	0	0	1	0	0	1	0	0	1	0	0
1	3	2	1	3	1	3	1	2	5	5	4	1	1	0	0	0	0	0	1	1	1	0	1	0	0	1	1	0	1	1	1	1	1	0	0	0	1	1	1	1	0	0	0	0	0	0	1	0	0
1	3	2	1	3	1	3	1	3	5	5	4	3	2	0	0	0	0	0	5	1	1	0	1	0	0	1	1	0	1	1	1	1	0	0	0	0	0	1	0	0	1	0	0	0	1	0	1	0	0
1	3	2	1	3	1	3	1	3	5	5	2	3	0	0	0	0	0	0	2	2	2	0	0	0	1	1	1	0	1	1	0	0	0	0	1	0	0	0	0	0	1	0	0	0	0	0	0	0	0
2	3	2	4	3	1	2	2	2	5	4	1	1	0	0	0	0	0	0	4	1	2	0	0	0	1	1	1	1	1	0	0	0	0	0	0	0	0	0	0	0	0	0	0	0	0	1	0	0	0
2	2	3	1	3	1	3	2	6	4	5	4	1	0	0	0	0	0	0	7	1	1	0	1	0	0	1	0	0	0	1	0	0	0	0	0	0	0	0	0	0	1	0	1	0	0	1	1	1	0
2	1	3	4	1	1	3	1	6	2	5	3	1	0	0	0	0	0	0	3	2	2	0	1	0	0	1	0	0	0	0	0	1	0	0	0	0	0	1	0	0	0	0	0	0	0	0	0	0	0
2	2	3	1	3	1	3	1	1	4	4	4	2	0	0	0	0	0	0	1	1	1	0	1	0	0	1	1	0	0	1	0	1	0	0	0	0	0	0	0	1	0	1	0	0	0	0	0	1	0
1	6	2	1	3	1	3	1	3	5	4	4	3	0	0	0	0	0	0	3	1	2	0	1	0	0	1	1	0	0	1	1	0	0	0	1	0	0	1	1	1	1	1	1	1	1	0	1	1	0
2	6	2	1	3	1	3	3	10	5	4	4	2	0	0	0	0	0	0	3	1	2	0	1	0	0	1	1	0	0	1	0	0	0	0	0	0	0	1	0	1	0	1	0	0	1	0	0	1	0
2	3	2	1	3	1	3	3	10	5	5	1	1	1	0	0	0	0	0	1	1	2	0	1	0	0	0	1	0	0	0	0	1	0	0	0	0	0	1	1	1	0	0	0	0	1	0	0	1	0
2	2	2	1	2	1	2	3	9	4	3	2	2	0	0	0	0	0	0	2	2	2	0	1	0	0	1	1	0	1	1	0	0	0	0	0	0	0	1	1	1	1	0	0	1	1	0	1	1	0
1	1	2	4	1	1	2	1	1	5	5	2	1	0	0	0	0	0	0	3	1	2	0	1	1	0	1	0	0	1	0	0	0	0	1	0	0	1	1	1	0	1	0	1	1	0	0	0	1	0
2	1	2	1	1	2	2	2	1	3	4	4	3	3	0	0	0	0	0	4	2	1	0	1	0	0	1	0	0	0	0	0	1	0	0	0	0	0	1	0	1	1	1	0	0	0	0	1	0	0
2	2	1	1	2	2	2	2	9	4	4	4	3	3	0	0	1	0	0	2	2	1	0	1	0	0	1	0	0	1	1	1	1	1	0	0	0	0	1	1	1	1	0	0	1	0	0	1	0	0
1	3	3	1	3	1	2	1	2	5	5	4	1	0	0	0	0	0	0	1	1	1	0	1	0	0	1	0	0	1	0	0	0	0	0	0	0	0	0	1	0	0	0	0	0	0	0	0	0	0
2	6	1	1	3	1	2	2	2	5	5	4	2	1	0	0	1	0	0	3	1	2	0	0	1	0	0	1	0	0	1	0	0	0	0	0	0	0	0	0	0	0	0	0	1	0	0	1	0	0
2	3	2	1	3	1	3	2	2	4	3	3	1	1	0	0	0	0	0	2	1	1	0	1	0	0	0	1	0	1	0	0	0	0	0	0	0	0	0	0	1	0	0	0	0	0	0	0	1	0
2	6	3	1	3	1	4	1	2	5	4	2	1	1	0	0	0	0	0	2	1	2	0	1	0	0	1	1	0	1	1	0	0	0	1	0	0	0	0	0	0	1	0	0	0	0	0	1	0	0
2	2	2	1	2	1	2	2	9	3	5	2	3	3	0	1	0	0	0	2	1	2	0	1	0	0	1	0	0	1	0	0	0	0	1	0	0	1	1	1	1	1	1	1	1	0	0	1	1	0
2	1	2	4	1	1	2	1	2	2	5	3	3	2	0	0	0	0	0	3	2	2	0	1	0	0	1	1	0	0	1	0	1	0	0	0	0	0	1	0	1	0	0	0	0	0	1	0	1	0
2	1	2	1	2	2	2	2	2	3	4	4	3	3	0	2	0	0	0	2	1	1	0	1	0	0	1	1	0	1	0	0	0	0	0	0	0	0	0	0	0	0	0	1	0	1	0	0	0	1
2	3	2	1	3	1	3	1	6	5	5	2	2	2	0	0	0	0	0	1	1	1	0	1	0	0	1	0	0	1	0	0	0	0	0	0	0	0	0	1	1	1	0	1	0	0	0	1	1	0
2	2	2	1	2	1	3	2	9	4	4	2	1	0	0	0	0	0	0	2	1	2	0	1	0	0	0	1	0	1	0	0	0	0	0	0	0	0	0	0	0	0	1	0	0	0	0	0	1	0
2	2	2	1	2	1	2	2	3	4	5	4	3	2	0	0	0	0	0	4	1	2	0	1	0	0	1	1	0	0	1	0	0	0	1	1	1	1	1	0	1	1	1	1	1	0	0	0	1	0
2	1	1	1	1	2	2	2	9	2	4	4	1	0	0	0	1	0	0	4	1	2	0	1	0	1	1	0	0	1	0	1	0	0	0	0	0	1	0	1	0	0	0	0	0	0	1	0	0	0
2	1	1	4	1	2	1	2	9	1	4	2	2	0	0	0	0	0	0	1	1	2	0	1	0	0	1	0	0	0	1	0	0	0	0	0	0	0	1	1	1	0	0	1	0	0	0	0	1	0
1	2	3	4	1	1	2	1	9	2	5	4	3	3	0	0	0	0	0	2	2	2	0	1	0	0	1	0	0	0	0	1	0	0	0	0	0	0	0	1	0	0	0	0	0	0	0	1	1	0
2	1	2	4	2	2	2	2	1	3	4	4	2	2	0	0	0	0	0	2	1	2	0	1	0	0	1	1	0	1	1	1	1	0	0	0	0	0	1	1	0	1	0	1	1	1	0	1	0	0
1	6	2	1	3	1	4	1	2	5	4	4	2	0	0	0	0	0	0	1	1	1	0	1	0	0	1	1	0	1	1	0	0	0	0	0	0	0	1	1	0	0	1	1	0	0	0	0	1	0
2	1	2	1	1	2	1	2	1	4	5	4	3	3	1	3	3	3	0	5	1	2	0	1	0	0	1	1	0	0	1	0	1	0	0	0	0	0	1	1	0	1	0	1	1	1	0	1	0	0
2	1	1	4	1	2	1	2	10	2	5	4	3	3	0	0	0	0	0	5	1	2	0	1	0	0	0	1	0	0	0	1	0	0	0	0	0	0	0	1	0	0	1	1	0	0	0	1	0	0
2	1	2	4	2	2	1	1	10	1	3	1	0	1	0	1	0	1	0	1	1	1	1	0	0	0	1	0	0	1	0	0	0	0	1	0	0	1	0	0	0	0	0	0	0	0	0	0	0	0
2	1	2	1	1	2	2	1	9	2	4	4	1	0	0	0	0	0	0	5	1	2	0	1	0	0	0	1	0	0	1	0	0	0	0	0	0	0	0	1	1	0	0	1	0	0	0	1	0	0
2	6	1	1	2	1	2	2	10	5	4	4	2	2	0	0	0	0	0	4	1	2	0	1	0	0	1	1	0	0	1	1	0	0	0	0	0	0	0	0	1	0	0	0	0	0	0	0	1	0
2	3	2	1	2	1	2	1	10	4	5	3	2	0	0	0	0	0	0	4	3	2	0	1	0	0	1	0	0	0	1	0	0	0	0	1	0	0	1	0	0	0	1	0	0	0	0	1	0	0
2	1	3	4	1	1	2	1	2	2	5	4	3	2	0	0	0	0	0	3	2	1	0	1	0	0	1	0	0	1	0	0	0	0	0	0	0	0	0	0	0	1	0	0	0	0	0	0	1	0
1	2	2	4	2	1	2	1	2	3	5	2	3	3	0	0	0	0	0	2	1	2	0	1	0	0	1	0	0	1	1	0	0	0	1	0	0	0	0	0	0	0	0	0	0	0	0	0	0	0
1	2	3	1	2	1	2	1	2	3	5	4	2	2	0	1	1	0	0	2	2	1	0	1	0	0	1	0	0	1	0	0	0	0	0	0	0	0	1	0	0	0	0	0	0	0	0	0	0	0
2	1	1	4	1	2	1	2	9	1	4	4	1	0	0	0	0	0	0	5	1	2	0	1	0	0	1	0	0	1	1	0	0	0	0	0	0	0	1	0	1	0	0	1	0	0	0	1	0	0
2	6	2	1	3	1	2	1	10	5	4	4	2	1	0	0	0	0	0	4	1	2	0	1	0	0	0	1	0	1	1	0	0	0	0	0	0	0	0	0	1	0	0	0	0	0	0	1	1	0
2	6	1	4	3	1	3	1	10	5	5	3	2	0	0	0	0	0	0	4	3	2	0	1	0	0	1	0	0	1	1	0	0	0	0	0	0	1	1	0	0	0	0	0	0	0	0	1	0	0
1	3	2	1	3	1	3	1	10	5	5	4	3	2	0	1	0	0	0	4	1	2	0	1	0	0	1	1	1	1	1	1	1	0	1	1	1	1	1	1	1	1	1	0	1	1	0	0	0	0
2	1	3	4	1	1	2	1	2	2	5	4	1	2	0	0	0	0	0	3	1	1	0	1	0	0	1	0	0	0	0	0	1	0	0	0	0	0	1	1	0	0	0	1	0	0	0	1	0	0
2	1	2	1	3	2	2	2	2	3	4	4	1	0	0	0	0	0	0	2	1	2	0	1	0	0	1	0	0	0	1	0	0	0	0	0	0	0	1	0	0	0	0	0	1	1	0	1	1	0
2	1	1	4	1	2	2	2	2	2	4	4	1	0	0	0	0	0	0	1	1	2	0	1	0	0	1	0	0	1	0	0	0	0	0	0	0	0	1	0	0	0	0	0	1	1	0	0	0	0
2	1	1	4	1	2	2	2	2	2	4	4	1	0	0	0	2	0	0	2	1	1	1	0	0	0	1	0	0	1	1	0	0	0	0	1	0	0	0	0	0	0	0	0	0	0	0	1	1	0
2	1	1	4	2	2	2	2	4	3	5	4	2	0	0	0	0	0	0	2	2	1	0	1	0	0	1	0	0	1	1	0	0	0	0	0	0	1	1	1	0	0	0	0	0	0	0	1	0	0
2	1	1	1	1	2	2	2	2	4	4	3	1	1	0	0	0	0	0	5	1	2	0	1	0	0	1	1	0	0	1	0	0	0	1	0	0	0	0	0	0	0	0	0	0	0	0	0	0	0
2	3	1	1	2	1	3	2	2	5	5	1	3	0	0	0	0	0	0	4	1	2	0	1	0	0	1	0	0	0	1	0	0	0	0	0	0	0	1	0	1	0	0	0	1	0	0	1	0	0
1	1	2	4	1	1	3	3	9	2	5	4	2	0	0	0	0	0	0	1	1	2	0	1	0	0	1	1	0	0	1	1	0	0	0	0	0	0	1	1	1	0	0	1	1	0	0	1	1	0
2	1	3	1	1	1	2	1	9	2	5	4	2	0	0	0	0	0	0	3	1	1	0	1	0	0	1	1	0	0	1	1	0	0	0	0	0	0	1	0	0	1	0	0	1	0	0	1	0	0
2	2	2	1	2	1	1	2	9	5	4	4	2	0	0	0	0	0	0	1	1	1	0	1	0	0	1	0	0	0	0	0	0	1	0	0	0	0	1	0	0	1	0	0	1	0	0	1	1	0
2	2	3	1	2	1	3	1	9	3	5	4	2	2	0	2	2	0	0	3	2	1	0	1	1	0	1	1	0	1	0	0	1	0	0	0	0	0	1	0	1	0	0	0	0	0	1	0	0	1
2	6	2	1	3	1	2	1	9	5	4	4	2	0	0	0	0	0	0	1	1	2	0	1	0	0	1	0	0	0	0	0	1	0	0	0	0	0	0	1	1	0	0	0	0	0	0	1	0	0
2	2	3	1	1	1	2	1	9	3	5	2	3	0	0	0	0	0	0	1	1	2	0	1	0	0	1	0	0	0	1	0	0	0	0	0	0	0	0	1	1	0	0	0	0	0	0	1	1	0
2	1	1	4	1	2	2	2	9	2	4	4	3	3	0	0	0	0	0	4	1	2	0	1	0	0	1	0	0	1	1	0	0	0	0	0	0	0	1	0	1	0	1	1	0	0	0	1	1	0
2	1	2	1	1	1	2	2	9	3	4	4	2	2	0	0	0	0	0	4	1	2	0	1	0	0	0	1	0	0	0	1	0	0	0	0	1	0	1	1	1	0	1	1	1	1	0	1	1	0
2	1	2	1	2	2	2	2	9	2	5	4	1	0	0	0	0	0	0	1	1	2	0	1	0	0	1	1	0	1	0	0	0	0	0	0	0	0	0	1	0	0	0	1	1	1	0	1	0	0
2	2	2	1	1	1	2	2	9	3	5	4	1	1	0	0	0	0	0	2	2	2	0	1	1	0	1	1	0	1	1	0	0	0	0	0	0	0	1	0	1	1	1	1	1	0	0	1	1	0
2	1	2	1	3	1	2	2	9	3	4	4	2	1	0	1	0	0	0	1	1	2	0	1	0	0	0	1	0	0	0	0	0	1	0	0	0	0	0	1	0	0	0	0	0	0	1	1	0	0
2	1	2	1	1	1	2	2	9	3	5	3	1	0	0	0	0	0	0	1	2	1	0	1	0	0	1	1	1	1	1	0	0	0	0	0	0	0	1	1	0	0	1	1	0	0	0	1	1	0
2	2	3	1	2	1	2	1	1	3	5	3	3	2	0	1	1	0	0	2	2	1	0	1	0	0	1	1	0	0	0	1	0	0	1	0	0	0	0	0	0	1	1	1	1	1	0	1	1	0
2	1	3	1	1	1	2	1	1	2	5	3	2	2	0	0	0	0	0	2	2	2	0	1	0	0	1	0	0	0	0	1	0	0	0	0	0	0	0	0	0	1	0	0	0	0	0	0	1	0
2	1	3	4	1	1	2	1	2	2	5	4	2	0	0	0	0	0	0	2	2	2	0	1	1	0	1	1	0	1	1	1	0	0	0	0	0	0	1	0	1	1	1	0	0	0	0	0	1	0
2	1	3	1	1	1	3	1	1	2	5	4	3	2	0	0	0	0	0	2	1	2	0	1	0	0	1	1	0	0	1	1	0	0	0	0	0	1	1	0	1	0	0	1	0	0	0	1	1	0
2	2	3	1	2	1	1	1	1	4	5	4	2	0	0	0	0	0	0	3	3	2	0	1	0	0	1	1	0	0	1	1	1	0	0	0	0	0	0	0	0	1	0	0	0	1	0	1	0	0
2	2	3	1	1	2	2	1	1	2	5	4	3	0	0	0	0	0	0	1	1	2	0	1	0	0	1	1	0	1	1	0	1	1	1	1	1	1	1	1	1	1	1	1	1	1	0	1	1	0
2	1	1	4	1	1	2	2	2	3	4	4	1	0	0	0	0	0	0	1	2	2	0	1	0	0	1	0	0	0	1	0	0	0	0	0	0	0	0	1	1	0	0	0	1	0	0	1	1	0
2	1	3	4	2	1	3	1	1	2	5	2	2	0	0	0	0	0	0	3	1	2	0	1	0	0	1	0	0	1	0	0	0	0	1	1	1	0	0	0	0	1	0	0	1	1	0	0	1	0
2	1	2	4	1	1	1	2	1	2	4	4	1	0	0	0	0	0	0	1	2	2	0	1	0	0	1	0	0	0	1	0	0	0	0	0	0	0	0	1	1	0	0	0	1	0	0	1	1	0
2	2	1	1	1	1	2	2	1	3	5	4	3	2	0	0	0	0	0	1	2	2	0	1	0	0	1	0	0	0	0	0	1	0	0	0	0	0	1	1	0	1	0	1	1	0	0	0	1	0
2	2	2	1	2	1	2	2	1	3	4	4	3	3	0	1	0	0	0	1	1	1	0	1	0	0	0	1	0	1	0	0	0	0	0	0	1	0	1	1	0	0	0	0	0	0	0	1	1	0
2	3	2	1	2	1	2	2	9	5	4	4	2	0	0	0	0	0	0	1	1	2	0	1	0	0	0	1	0	0	0	0	1	0	0	0	0	0	1	1	0	0	0	0	0	0	0	1	0	0
2	3	1	1	1	1	2	2	9	5	4	4	2	0	0	0	0	0	0	1	1	2	0	1	0	0	0	1	0	0	0	1	0	0	0	0	0	0	0	1	0	0	0	0	0	0	0	1	1	0
2	2	3	1	2	1	3	1	9	3	5	3	2	0	0	0	0	0	0	1	1	2	0	1	0	0	0	1	0	0	1	0	0	0	0	0	0	0	1	1	1	0	0	0	0	0	0	0	1	0
2	1	3	4	1	1	2	1	9	1	5	4	1	1	0	0	0	0	0	2	1	1	0	1	0	0	0	1	0	0	1	0	0	0	0	0	0	0	1	0	0	1	1	1	0	0	0	0	1	0
2	1	3	1	1	1	3	1	9	2	5	4	3	0	0	0	0	0	0	2	2	2	0	1	0	0	1	0	0	0	1	1	0	0	0	0	0	0	1	0	1	1	1	1	1	0	0	0	0	0
1	1	3	4	1	1	3	1	9	2	5	4	3	3	0	0	0	0	0	3	1	1	0	1	0	0	1	0	0	1	1	0	0	0	0	0	0	0	1	0	0	1	0	0	0	0	0	0	0	0
1	2	3	1	2	1	3	1	9	3	5	4	2	1	0	0	0	0	0	3	1	2	0	1	1	0	1	0	0	0	1	0	0	0	0	0	0	0	0	1	0	1	0	0	0	1	0	0	1	0
1	1	3	4	1	2	2	1	3	1	5	4	1	0	0	0	0	0	0	2	1	2	0	0	0	1	0	1	0	0	1	0	0	0	0	0	1	0	0	0	0	0	0	0	0	0	0	0	0	1
2	3	3	1	3	1	2	1	9	5	5	4	1	1	0	1	0	0	0	3	3	2	0	1	0	0	1	0	0	0	1	0	0	0	0	0	0	0	0	0	0	1	0	0	0	0	0	1	0	0
1	3	3	1	3	1	3	1	6	4	5	4	0	2	0	0	0	0	0	2	1	2	0	1	0	0	1	0	0	0	0	1	0	0	0	0	0	0	0	0	0	1	0	0	0	0	0	0	1	0
1	3	3	1	3	1	2	1	6	3	4	3	0	0	0	1	0	0	0	2	2	2	0	1	0	0	1	0	0	0	1	0	0	0	0	0	0	0	0	0	0	1	0	0	0	0	0	0	1	0
1	2	3	1	1	1	2	1	6	2	5	1	2	1	0	0	0	0	0	3	2	1	0	1	0	0	1	0	0	0	1	1	0	0	0	0	1	0	0	0	0	1	1	0	0	0	0	0	0	0
1	3	3	1	3	1	3	1	6	3	5	4	0	0	0	1	0	0	0	2	1	2	0	1	0	0	1	0	0	0	0	1	0	0	0	0	0	0	0	0	0	1	0	0	0	0	0	0	1	0
2	2	3	1	2	1	3	1	6	4	5	4	3	2	0	1	0	0	0	1	1	2	0	1	1	0	1	1	0	1	1	1	0	0	0	0	0	0	1	1	1	1	0	0	0	1	0	1	1	0
2	2	3	1	2	1	3	1	6	3	5	4	2	2	0	0	0	0	0	3	1	2	0	1	0	0	1	1	0	0	1	0	0	0	1	0	0	0	0	0	0	0	0	0	0	0	0	1	1	0
2	1	3	4	1	1	3	1	2	2	5	4	1	0	0	0	0	0	0	3	1	2	0	1	0	0	1	0	0	0	1	1	0	0	1	0	0	0	1	1	1	1	0	0	0	1	0	1	1	0
2	3	2	1	3	1	3	1	6	5	5	4	1	0	0	0	0	0	0	1	2	2	0	1	0	0	1	0	0	1	1	0	0	0	0	0	0	0	0	0	1	1	0	0	0	0	0	1	0	0
2	1	2	4	1	1	1	2	2	1	5	4	2	1	0	0	0	0	0	1	2	2	0	1	0	0	1	0	0	0	0	0	0	1	1	0	1	1	1	0	1	1	1	1	1	1	0	0	1	0
2	2	2	1	1	1	3	2	6	3	5	4	1	0	0	0	0	0	0	1	1	2	0	1	0	0	1	0	0	0	1	0	0	1	0	0	0	0	1	1	1	0	0	1	1	0	0	1	0	0
2	3	1	1	3	1	3	2	6	5	4	4	3	1	0	0	0	0	0	2	2	2	0	1	0	0	1	0	0	0	1	0	0	0	0	0	0	0	1	1	1	1	1	1	1	1	0	1	1	0
2	1	2	1	1	1	2	2	6	3	4	1	1	2	0	0	0	0	0	2	2	2	0	1	0	0	0	1	0	0	1	0	0	0	0	0	0	0	0	1	1	0	0	0	0	0	1	0	1	0
2	2	2	1	1	2	2	2	6	3	5	2	0	1	0	0	0	0	0	4	1	1	0	1	0	0	1	0	0	1	1	0	0	0	0	0	0	0	0	1	0	0	0	0	0	0	0	0	1	0
2	1	2	1	1	1	2	2	6	3	5	4	1	1	0	0	0	0	0	3	1	2	0	1	0	0	1	0	0	0	1	0	0	0	0	0	0	1	1	0	0	1	0	1	1	1	0	0	1	0
2	1	2	4	1	2	1	2	3	2	4	4	1	1	0	0	0	0	0	1	1	2	0	1	0	0	1	0	0	0	1	1	0	0	0	0	0	1	1	1	1	1	1	1	1	1	0	1	1	0
2	2	2	1	1	2	2	2	9	3	4	4	0	1	0	0	0	0	0	4	2	2	0	1	0	0	1	0	0	0	1	0	0	0	0	0	0	0	0	0	0	1	0	0	0	0	0	1	0	0
2	1	2	4	1	2	2	2	2	2	4	4	2	2	0	1	0	0	0	1	1	2	0	1	0	0	1	0	0	1	1	0	0	0	0	0	0	0	1	1	0	0	1	1	0	0	0	1	0	0
2	2	2	1	2	1	2	2	9	4	4	4	1	0	0	0	0	0	0	1	2	2	0	1	0	0	1	0	0	0	1	0	0	0	0	0	0	1	0	0	0	0	0	0	0	0	0	0	0	0
2	2	2	1	1	1	2	2	9	4	5	4	3	2	0	2	0	0	0	1	1	2	0	1	1	0	1	1	0	0	1	1	1	0	0	0	0	0	1	1	1	1	0	1	1	0	0	1	1	0
2	2	2	4	1	1	2	2	9	4	5	4	3	2	0	0	0	0	0	4	1	2	0	1	0	0	1	1	0	1	1	0	0	0	1	1	0	0	1	1	1	1	0	1	1	0	0	1	1	0
2	2	2	1	1	2	2	2	9	3	4	4	1	0	0	0	0	0	0	4	1	2	0	1	0	0	1	0	0	0	1	0	0	0	0	0	0	0	0	0	1	1	1	0	1	0	0	0	0	0
2	2	2	1	1	1	1	2	9	3	5	4	2	0	0	0	0	0	0	4	1	2	0	1	0	0	1	1	0	0	0	1	0	0	0	0	0	0	1	0	0	0	0	0	1	0	0	0	0	0
2	1	2	1	1	1	2	2	9	3	5	4	2	0	0	0	0	0	0	1	1	2	0	1	0	0	1	0	0	0	1	0	0	0	0	0	0	0	1	0	0	1	0	0	0	0	0	1	0	0
2	1	2	1	1	1	2	2	6	3	4	4	2	0	0	0	0	0	0	2	1	2	0	1	0	0	1	1	0	1	1	0	0	0	0	1	1	0	1	1	1	1	1	0	0	1	0	0	1	0
1	6	2	1	3	1	3	1	3	5	5	2	3	3	0	0	0	0	0	3	1	1	1	1	0	0	1	1	0	1	0	0	0	0	0	0	0	0	0	0	1	0	0	0	0	1	0	1	0	0
1	2	3	1	2	1	2	1	6	3	5	3	2	0	0	0	0	0	0	2	1	1	0	1	0	0	1	0	0	0	1	0	0	0	0	0	0	0	1	0	1	1	1	0	1	1	0	0	1	0
1	2	3	1	1	1	2	1	3	2	5	4	1	1	0	0	0	0	0	2	1	1	0	1	0	0	1	0	0	0	0	1	0	0	0	0	0	0	1	0	1	1	1	0	1	1	0	0	1	0
1	6	2	1	3	1	3	1	10	2	4	2	2	0	0	1	0	0	0	3	1	2	0	1	0	0	1	1	0	0	0	0	1	0	0	0	0	0	1	1	0	1	0	0	0	1	0	1	0	0
1	2	2	1	2	1	3	1	10	3	4	1	2	0	0	0	0	0	0	1	1	2	0	1	0	0	1	0	0	0	0	0	0	1	0	0	0	0	1	0	1	0	0	1	0	0	0	1	1	0
1	2	2	1	2	1	3	1	10	3	3	4	3	0	0	1	0	0	0	5	2	1	0	1	0	0	1	1	0	0	1	1	0	0	0	0	0	0	1	0	0	0	0	1	0	1	0	1	1	0
2	1	3	4	1	1	2	1	10	2	4	4	2	0	0	0	0	0	0	5	2	1	0	1	0	0	1	1	0	0	1	0	1	0	0	0	0	0	1	0	0	0	0	1	0	0	0	1	1	0
2	2	2	1	2	1	3	2	10	4	4	2	1	1	0	0	0	0	0	1	1	2	0	1	0	0	0	1	0	1	0	0	0	0	0	0	0	0	0	0	1	0	0	0	0	0	0	0	1	0
2	1	2	4	1	1	2	3	9	3	4	3	3	1	0	0	2	0	0	1	1	1	1	0	0	0	1	1	1	0	0	0	0	0	0	0	0	0	1	0	0	0	0	0	0	0	0	1	1	0
2	1	3	1	3	1	2	3	9	3	4	3	3	1	0	0	2	0	0	1	1	1	1	0	0	0	1	0	1	0	0	0	0	0	0	1	0	0	0	0	0	0	0	0	0	0	0	1	1	0
1	3	3	1	3	1	4	1	9	5	5	4	3	2	0	3	3	0	0	1	2	1	0	1	0	0	1	1	1	0	0	0	0	0	0	0	0	0	1	0	0	0	0	0	0	0	0	1	1	0
1	6	2	1	2	1	1	1	9	5	4	4	3	1	1	0	0	0	0	1	1	2	0	1	0	0	1	0	0	0	0	0	1	0	0	0	0	0	1	0	0	0	1	0	0	0	0	1	0	0
2	2	3	1	2	1	2	1	9	3	4	3	3	1	1	0	0	0	0	1	1	2	0	1	0	0	1	0	0	0	0	0	1	0	0	0	0	0	1	0	0	0	1	0	0	0	0	1	0	0
2	2	3	1	2	1	2	1	9	3	4	3	3	1	1	0	0	0	0	1	1	2	0	1	0	0	1	0	0	0	0	0	1	0	0	0	0	0	1	0	0	0	1	0	0	0	0	1	0	0
2	1	2	4	1	1	2	2	3	2	5	4	3	2	0	0	0	0	0	2	1	2	0	1	0	0	0	1	0	1	0	0	0	0	0	0	0	0	1	0	0	1	0	0	1	0	0	0	0	0
2	2	2	1	1	1	2	2	3	3	4	3	3	2	0	1	1	0	0	4	1	1	0	1	1	0	1	1	0	1	1	1	1	1	1	0	0	0	1	1	1	1	1	1	1	1	1	1	1	1
1	2	3	1	2	1	3	1	3	3	5	3	1	0	0	0	0	0	0	3	1	2	0	1	0	0	1	0	0	1	0	0	0	0	0	1	0	0	1	0	0	0	1	0	1	0	0	0	1	0
1	2	3	1	2	1	3	1	3	3	5	3	3	0	0	0	0	0	0	3	2	2	0	0	1	0	1	1	0	1	0	0	1	0	0	0	0	0	1	0	1	0	0	1	1	1	0	0	0	0
1	1	3	1	1	1	2	1	3	2	5	4	1	1	0	0	0	0	0	3	1	2	0	1	0	0	0	1	0	0	1	0	0	0	0	0	0	0	1	1	1	0	0	0	0	0	0	1	0	0
1	1	2	4	1	1	2	2	3	2	4	4	2	0	0	1	0	0	0	2	1	2	0	1	0	0	1	0	0	0	0	0	1	0	0	1	0	0	0	0	0	0	0	0	0	0	0	0	1	0
2	1	3	1	1	1	3	1	3	2	3	1	0	1	0	0	0	0	0	2	2	2	0	1	0	0	1	1	0	1	1	1	0	0	0	0	0	0	0	1	0	0	1	1	1	1	0	0	1	0
1	2	3	1	2	1	2	1	3	3	5	4	3	3	0	1	0	0	0	1	1	1	0	1	0	0	1	0	0	0	1	1	0	0	0	1	0	0	1	1	1	1	1	0	1	1	1	1	1	0
1	2	3	1	2	1	2	1	3	2	5	4	1	1	0	0	0	0	0	1	1	2	0	1	0	0	1	1	0	0	1	1	1	0	0	0	0	0	1	1	1	0	0	0	0	0	1	0	1	0
2	2	1	1	1	1	2	2	2	4	5	4	3	1	0	0	0	0	0	2	1	2	0	1	0	0	1	0	0	0	1	1	1	0	0	0	0	0	1	1	1	0	0	1	1	1	0	1	1	0
2	2	2	1	2	2	2	2	3	4	5	4	2	1	0	0	0	0	0	4	1	2	0	1	0	0	0	1	0	1	0	0	0	0	0	0	0	0	0	0	0	0	1	0	0	0	0	1	0	0
2	3	2	1	3	1	3	2	3	5	5	4	3	1	0	0	0	0	0	4	1	2	0	1	0	0	1	1	0	1	0	1	0	0	0	0	0	0	1	0	1	0	0	1	0	0	0	1	1	0
2	3	2	1	2	1	2	2	3	5	4	4	2	0	0	0	0	0	0	1	1	2	0	1	0	0	1	0	0	1	1	0	0	0	0	0	0	0	0	0	0	1	0	0	1	0	0	1	0	0
1	2	3	1	2	1	3	1	3	3	5	4	3	3	0	3	0	0	0	1	2	1	0	1	0	0	1	1	0	0	1	1	1	1	0	1	0	0	1	1	1	1	1	1	1	1	0	1	1	0
1	1	3	1	1	1	2	1	3	2	5	4	1	0	0	0	0	0	0	3	1	1	0	1	0	0	1	0	0	0	1	0	0	0	0	0	0	0	0	1	0	1	1	0	1	0	0	0	0	0
2	2	2	1	1	1	3	2	3	4	5	4	3	3	0	0	0	0	0	1	1	2	0	1	0	0	1	0	0	0	1	0	0	0	0	0	0	0	0	0	1	1	0	0	1	1	1	1	1	0
2	2	2	1	1	2	2	2	3	3	4	4	1	0	0	0	0	0	0	2	1	2	0	1	0	0	1	0	0	0	0	1	0	0	0	0	0	0	0	0	0	0	1	0	0	0	0	0	1	0
2	2	2	1	3	1	3	2	3	5	5	4	3	3	0	0	0	0	0	4	1	2	0	1	0	0	1	1	0	0	1	1	1	1	0	0	0	0	0	1	1	1	1	1	1	0	0	1	1	0
1	2	2	1	3	1	3	1	2	4	5	3	1	0	0	1	0	0	0	2	1	2	0	1	0	0	1	0	0	1	0	0	0	0	0	0	0	0	1	1	1	1	1	0	0	0	0	0	0	0
2	2	3	1	3	1	3	1	2	4	4	4	2	1	0	0	0	0	0	3	1	2	0	1	0	0	0	1	0	0	0	0	1	0	0	0	0	0	1	0	0	1	0	0	0	0	0	0	1	0
2	1	3	1	1	1	2	1	2	2	5	4	2	1	0	0	0	0	0	3	1	2	0	1	0	0	0	1	0	0	1	0	0	0	0	1	0	0	0	0	0	1	0	0	0	0	0	0	0	0
2	1	3	4	1	1	3	1	9	2	5	4	1	1	0	0	0	0	0	4	1	2	0	1	1	0	1	0	0	1	0	0	0	0	0	0	0	0	1	0	0	0	1	0	0	0	0	0	0	0
2	2	3	1	1	1	2	1	2	2	5	4	2	0	0	0	0	0	0	3	2	2	0	1	0	0	1	0	0	0	1	1	0	0	0	0	0	0	1	0	1	1	0	0	1	0	0	1	1	0
1	2	3	1	2	1	1	2	2	3	4	4	1	0	0	0	0	0	0	2	1	1	0	0	1	0	0	1	0	0	1	0	0	0	0	0	0	0	0	1	1	0	0	1	1	0	0	1	1	0
1	3	2	1	3	1	3	1	2	5	5	3	1	1	0	1	0	0	0	2	1	2	0	1	0	0	1	0	0	1	0	0	0	0	0	0	0	0	1	0	0	1	0	0	0	0	0	1	1	0
2	1	3	4	1	1	1	1	2	2	5	4	3	3	0	3	3	0	0	2	1	2	0	1	0	0	1	1	1	1	1	1	1	1	0	1	1	1	1	1	1	1	0	1	1	1	0	1	1	0
2	1	2	1	1	1	2	2	2	3	5	4	2	0	0	0	0	0	0	2	1	2	0	1	0	0	0	1	0	0	1	0	0	0	0	0	0	0	1	0	0	0	0	0	0	0	0	0	1	0
1	2	3	1	1	1	2	1	2	3	5	4	3	2	0	0	0	0	0	3	1	2	0	1	0	0	1	0	0	0	0	0	1	0	0	0	0	0	0	1	0	1	0	0	0	0	0	1	1	0
1	1	3	4	1	1	2	1	2	1	4	4	1	0	0	0	0	0	0	1	1	2	0	1	0	0	0	1	0	0	1	0	0	0	0	0	0	0	0	1	0	0	0	0	0	0	1	0	0	0
1	2	2	1	2	1	2	1	2	3	5	4	2	1	0	1	1	0	0	3	1	1	0	1	0	0	1	1	0	0	1	1	0	0	0	0	0	0	0	1	1	0	0	1	1	0	0	1	0	0
2	1	3	1	1	1	1	1	2	2	5	4	3	3	0	1	0	0	0	3	1	2	0	1	0	0	1	0	0	0	0	0	1	0	0	0	0	0	0	0	0	1	1	1	1	1	0	1	1	0
2	1	2	1	1	2	2	2	2	2	4	4	1	1	0	0	0	0	0	2	1	1	0	1	0	0	0	1	0	1	1	0	0	0	1	0	0	0	0	0	0	1	1	0	0	1	0	1	1	0
2	2	1	1	1	1	2	2	2	4	4	4	1	0	0	1	0	0	0	1	1	2	0	1	0	0	0	1	0	1	0	0	0	0	0	0	1	0	1	0	0	1	0	0	0	0	0	0	0	0
2	1	2	1	1	2	1	2	2	2	5	4	2	2	0	0	0	0	0	5	2	1	0	1	0	0	1	1	0	1	1	1	1	1	0	0	0	1	1	1	1	0	0	0	0	0	0	1	1	0
2	2	2	1	1	1	2	2	2	3	5	4	2	2	0	0	0	0	0	2	1	2	0	1	0	0	0	1	0	0	1	0	0	0	0	0	0	0	1	1	1	1	0	1	0	1	0	1	1	0
2	2	2	1	2	2	2	2	2	3	5	4	3	3	0	3	3	3	0	2	1	1	0	1	0	0	1	0	0	1	0	0	0	0	1	0	0	0	0	0	0	0	1	1	0	0	0	0	1	0
1	2	2	1	2	1	3	1	2	3	4	4	3	3	0	1	0	0	0	1	1	2	0	1	0	0	1	0	0	0	1	0	0	0	0	0	0	0	0	0	0	1	0	0	0	0	0	0	0	0
2	3	2	1	3	1	3	1	2	3	5	2	1	0	0	0	0	0	0	1	1	1	0	1	0	0	0	1	0	1	0	0	0	0	0	0	0	0	0	0	1	0	0	0	0	0	0	0	1	0
2	2	2	1	2	1	3	2	2	4	4	3	2	1	0	0	0	0	0	2	1	1	0	1	0	0	0	1	0	1	0	0	0	0	0	0	0	0	0	0	0	1	0	0	0	0	0	0	1	0
2	2	3	1	2	1	3	1	4	3	5	4	3	3	0	0	0	0	0	1	2	2	0	1	0	0	0	1	0	1	0	0	0	0	0	0	0	0	0	0	0	0	0	0	0	0	1	0	0	0
2	3	2	1	2	1	2	2	2	5	4	4	3	1	0	0	0	0	0	4	1	2	0	1	0	0	0	1	0	0	1	0	0	0	1	0	0	0	0	0	0	1	0	0	0	0	0	0	0	0
2	1	3	4	1	1	2	1	2	2	5	3	1	1	0	0	0	0	0	3	1	2	0	1	0	0	1	0	0	1	0	0	0	0	0	0	0	0	1	0	0	1	0	0	0	1	0	0	1	0
2	2	2	1	1	2	2	2	2	3	5	4	2	2	0	1	1	0	0	1	2	1	0	1	0	0	1	0	0	0	1	0	0	0	0	0	0	0	1	1	1	1	1	1	1	0	0	1	1	0
2	1	1	4	1	2	2	2	2	2	4	3	3	1	0	0	0	0	0	2	2	2	0	1	0	0	0	1	0	0	0	0	1	0	0	0	0	0	0	0	0	1	0	0	0	0	0	1	0	0
2	1	2	1	1	1	3	2	2	3	4	4	3	3	0	1	1	0	0	4	2	2	0	1	0	0	0	1	0	1	0	0	0	0	0	0	0	0	1	1	0	0	0	1	0	0	0	1	0	0
2	3	2	1	3	1	3	2	2	5	5	4	2	2	0	2	0	0	0	2	1	2	0	1	0	0	1	0	0	0	0	0	1	0	0	0	0	0	0	0	1	0	0	0	0	0	0	0	1	0
2	2	2	1	1	1	2	2	2	3	5	4	2	2	0	0	0	0	0	2	1	2	0	1	0	0	1	1	0	1	0	0	1	0	0	0	0	0	1	0	0	1	0	0	1	1	1	0	1	0
2	1	2	1	1	1	3	2	2	3	4	4	2	2	0	0	0	0	0	1	1	2	0	1	0	0	1	1	0	0	1	0	0	0	0	0	0	0	1	0	1	0	0	1	0	0	0	1	0	0
2	2	2	1	1	1	2	2	2	4	5	4	2	0	0	0	0	0	0	2	1	2	0	1	1	0	1	0	0	0	1	1	0	0	0	0	0	1	0	1	1	0	1	0	1	0	0	0	1	0
2	1	2	1	1	1	2	2	2	3	5	4	3	3	0	0	0	0	0	2	1	1	0	1	0	0	0	1	0	1	0	0	1	0	0	0	0	0	0	0	1	0	0	1	1	1	0	1	1	0
2	3	2	1	2	1	3	2	2	5	4	4	1	0	0	0	0	0	0	2	1	1	0	1	0	0	0	1	0	1	0	0	0	0	0	0	0	0	0	0	1	1	0	0	1	0	0	1	0	0
2	3	1	1	1	1	2	2	2	5	4	4	3	3	0	0	0	0	0	3	1	2	0	1	0	0	1	1	0	0	0	0	1	0	0	0	0	0	1	1	1	0	0	0	0	0	1	0	1	0
2	2	2	1	1	1	2	2	6	4	5	4	3	2	0	0	0	0	0	1	2	1	0	1	0	0	1	0	0	0	1	0	0	0	0	0	0	1	1	0	0	1	0	0	0	0	0	1	0	0
1	2	3	1	1	1	2	1	3	2	5	4	2	3	0	2	1	0	0	2	2	1	0	1	0	0	1	0	0	0	1	0	0	0	0	0	0	1	0	0	0	0	0	0	0	0	0	1	0	0
2	1	2	1	1	2	1	2	3	2	5	4	3	0	0	0	0	0	0	4	1	2	1	0	0	0	1	0	0	0	1	0	0	0	0	0	0	0	1	0	1	0	0	0	0	0	1	0	0	0
2	2	2	4	1	1	2	2	3	3	5	4	2	0	0	0	0	0	0	2	1	2	0	1	0	0	1	0	0	0	1	0	0	0	0	0	0	0	1	0	0	0	1	0	0	0	0	1	0	0
2	1	1	4	1	2	1	2	3	1	5	4	3	0	0	0	0	0	0	2	1	2	0	1	0	0	1	0	0	0	1	0	0	0	0	0	0	0	1	0	1	1	0	0	0	0	0	0	0	0
2	1	2	1	1	1	2	2	3	3	5	4	3	0	0	0	0	0	0	2	1	2	0	1	0	0	1	0	0	0	1	0	0	0	0	0	0	0	1	0	0	0	1	0	0	0	0	1	0	0
1	2	3	1	2	1	2	1	3	2	5	4	1	0	0	1	0	0	0	1	1	1	0	1	0	0	1	0	0	0	1	0	0	0	0	0	0	0	0	1	0	0	0	0	0	0	0	0	1	0
1	1	3	1	1	1	2	1	3	2	5	2	2	0	0	0	0	0	0	2	2	2	0	1	0	0	1	0	0	0	1	1	0	0	0	0	0	0	1	0	1	0	0	1	0	0	0	1	1	0
2	1	3	1	1	1	2	1	2	2	5	4	2	0	0	0	0	0	0	3	1	2	0	1	0	0	1	0	0	0	1	0	0	0	0	0	0	0	1	0	0	1	0	0	0	1	0	1	0	0
2	2	3	1	2	1	2	1	1	2	5	4	3	0	0	0	0	0	0	1	1	2	0	1	0	0	1	1	0	0	1	0	0	0	0	0	0	0	0	1	1	1	0	0	0	0	0	1	1	0
2	1	3	1	1	1	2	1	2	2	5	4	2	1	0	0	0	0	0	3	1	2	0	1	0	0	1	0	0	0	0	1	0	0	0	0	0	1	1	1	0	0	0	0	0	0	0	0	0	0
1	1	3	1	1	1	2	1	3	2	5	2	1	1	0	0	0	0	0	3	1	2	0	1	1	0	1	0	0	1	1	0	1	0	0	0	0	0	1	0	1	1	0	1	0	0	0	0	0	1
2	1	1	4	1	1	1	2	3	1	4	3	1	0	0	0	0	0	0	2	2	2	0	1	0	0	0	1	0	1	0	0	0	0	0	0	0	0	0	0	0	1	0	0	0	0	0	0	1	0
2	1	1	4	1	2	1	2	3	2	4	4	2	0	0	0	0	0	0	2	1	2	0	1	0	0	1	0	0	0	0	0	1	0	0	0	0	0	1	0	0	0	0	0	0	0	0	0	1	0
2	1	2	4	1	2	2	2	3	2	4	4	2	0	0	0	0	0	0	2	2	1	0	1	0	0	0	1	1	1	0	0	0	0	0	0	1	0	0	0	0	0	0	0	0	0	0	1	1	0
2	1	2	4	1	1	1	2	3	1	4	4	1	0	0	0	0	0	0	2	1	2	0	1	0	0	0	1	0	1	0	0	0	0	0	0	0	0	0	0	0	0	0	0	1	0	0	0	1	0
2	1	1	1	1	1	2	2	3	3	5	4	1	1	0	0	0	0	0	2	2	1	0	1	0	0	1	1	0	0	1	0	1	0	0	0	0	0	0	0	1	0	0	0	0	0	0	1	0	0
2	1	1	4	1	2	1	2	3	1	5	4	3	0	0	0	0	0	0	4	1	2	0	0	1	0	1	0	0	1	0	0	0	0	0	0	0	0	1	0	0	0	1	0	0	0	0	1	0	0
2	1	2	4	1	2	1	1	2	2	5	4	1	0	0	0	0	0	0	3	1	2	0	1	0	0	1	0	0	0	1	0	0	0	0	0	0	0	1	0	1	0	0	0	0	0	1	0	1	0
2	1	3	1	1	1	1	1	2	2	5	2	1	1	0	0	0	0	0	4	3	1	0	0	1	0	0	0	1	0	0	0	0	1	0	0	0	0	0	0	0	1	1	1	0	0	0	0	1	1
2	1	2	1	1	2	1	1	2	2	5	4	1	0	0	0	0	0	0	3	1	2	0	1	0	0	1	0	0	1	0	0	0	0	0	0	0	0	1	0	0	1	0	0	0	0	0	1	0	0
2	1	2	4	1	1	1	1	4	2	5	4	3	0	0	0	0	0	0	2	1	2	0	1	0	0	1	1	0	1	0	0	0	0	0	0	0	0	0	0	0	1	1	0	0	0	0	0	0	0
2	1	2	4	1	2	2	1	6	2	5	4	1	0	0	0	0	0	0	2	2	2	0	1	0	0	1	0	0	0	0	0	1	0	0	0	0	0	0	0	1	1	0	1	0	0	0	0	1	0
2	1	2	4	1	2	2	1	9	2	5	4	2	2	0	0	0	0	0	2	2	1	0	1	0	0	0	1	0	0	1	0	0	0	0	0	0	0	0	0	0	0	0	1	1	1	0	0	0	0
2	2	3	1	2	1	2	1	2	5	5	4	2	0	0	0	0	0	0	3	1	1	0	1	0	0	0	1	0	0	0	0	1	0	0	0	0	0	0	0	1	0	0	0	0	0	0	0	0	0
2	1	3	4	1	1	2	1	2	1	5	4	1	0	0	0	0	0	0	2	2	1	0	1	0	0	1	0	0	1	0	0	0	0	0	0	1	1	0	0	0	1	1	1	0	0	0	0	1	0
2	1	2	4	1	1	1	1	2	2	5	4	2	0	0	0	0	0	0	3	1	2	0	1	0	0	1	0	0	0	0	1	0	0	0	0	0	0	1	0	1	0	0	0	0	0	0	0	0	0
2	2	3	1	1	1	2	1	2	3	5	3	2	0	0	1	0	0	0	3	2	2	0	1	0	0	1	0	0	0	1	0	0	1	0	0	0	0	0	0	0	1	0	0	0	0	0	0	1	0
2	1	3	4	1	1	2	1	1	2	5	4	2	2	0	0	0	0	0	2	1	1	0	1	0	0	1	0	0	0	1	0	0	0	0	0	0	1	0	0	1	0	0	1	0	0	0	1	0	0
2	1	1	4	1	2	2	2	3	2	4	4	3	2	0	1	0	0	0	2	2	1	0	1	0	0	0	1	0	0	1	0	0	0	0	0	0	0	0	0	0	1	0	0	0	0	0	0	1	0
2	2	2	1	2	1	3	2	4	4	5	4	2	2	0	0	0	0	0	4	1	2	0	1	0	0	1	0	0	0	1	0	0	0	0	0	0	0	1	1	0	0	0	0	0	1	0	1	1	0
1	1	3	1	1	1	3	1	3	2	5	3	0	1	0	0	0	0	0	2	1	1	0	1	0	0	1	0	0	0	1	0	0	0	0	0	0	0	0	0	0	1	0	0	0	0	0	0	1	0
2	1	2	4	1	1	2	2	3	2	5	4	1	0	0	0	0	0	0	4	2	1	0	0	1	0	0	1	1	0	0	0	1	0	0	0	0	0	0	1	0	0	1	0	1	1	0	0	1	1
2	2	2	1	2	1	2	2	6	4	5	3	1	0	0	0	0	0	0	7	1	2	0	1	0	0	1	1	0	1	1	0	1	1	0	0	0	0	1	0	1	0	1	0	0	0	0	0	1	0
2	1	2	4	1	2	2	1	2	2	5	4	1	0	0	0	0	0	0	3	1	2	0	1	0	0	1	1	0	0	1	0	0	0	0	0	0	0	0	0	1	1	0	0	0	0	0	1	0	0
2	2	2	1	1	1	2	1	6	3	5	4	1	0	0	0	0	0	0	2	1	2	0	1	0	0	1	1	0	0	1	0	0	0	0	0	0	0	0	0	1	0	0	0	1	0	0	1	0	0
2	2	2	1	2	1	2	2	6	3	4	3	1	0	0	0	0	0	0	2	1	2	0	1	0	0	0	1	0	1	0	0	0	0	0	0	0	0	1	1	0	1	0	0	1	0	0	1	1	0
2	2	1	1	1	1	2	2	6	4	4	4	2	0	0	0	0	0	0	2	1	2	0	1	0	0	1	1	0	0	1	0	0	0	0	0	0	0	1	1	1	1	0	0	1	0	0	1	1	0
1	2	2	1	1	1	3	1	6	3	5	4	1	0	0	0	0	0	0	1	2	1	0	1	0	0	1	0	0	0	1	0	0	0	0	0	0	0	0	0	1	1	0	0	0	0	0	1	1	0
1	2	2	1	1	1	2	1	9	3	5	4	2	0	0	0	0	0	0	1	1	2	0	1	0	0	1	0	0	1	1	0	0	0	0	0	0	0	1	1	1	0	1	1	0	0	0	0	0	0
2	6	2	1	3	1	2	1	9	5	4	4	3	3	0	3	3	0	0	1	1	2	0	1	0	0	1	1	0	1	1	1	1	1	0	0	0	1	1	1	1	1	0	1	1	1	1	1	1	0
2	2	3	1	2	1	2	1	9	3	4	4	3	3	0	3	2	0	0	1	1	2	0	1	0	0	1	1	0	1	1	1	1	1	0	0	0	0	1	1	1	1	1	0	1	1	0	1	0	0
1	6	2	1	3	1	2	1	9	5	4	2	1	0	0	0	0	0	0	1	1	2	0	1	0	0	1	0	0	0	1	0	0	0	0	0	0	0	1	0	0	0	0	0	0	0	0	1	0	0
2	3	2	1	3	1	4	1	9	5	5	4	3	3	0	0	0	0	0	1	1	2	0	1	1	0	1	1	0	0	1	1	1	0	0	0	0	0	0	1	1	0	0	0	0	0	0	1	1	0
2	1	2	1	1	2	3	1	9	5	5	4	3	3	0	0	0	0	0	1	1	2	0	1	1	0	1	1	0	0	1	1	1	0	0	0	0	0	0	1	1	0	0	0	0	0	0	1	1	0
2	1	2	4	1	1	3	1	9	5	4	4	3	3	0	0	0	0	0	1	1	2	0	1	1	0	1	1	0	0	1	1	1	0	0	0	0	0	0	1	1	0	0	0	0	0	0	1	1	0
2	1	2	1	1	1	2	1	9	5	5	4	3	3	0	0	0	0	0	1	1	2	0	1	1	0	1	1	0	0	1	1	1	0	0	0	0	0	1	1	1	0	0	0	0	0	0	1	1	0
2	3	2	1	2	1	3	2	9	5	5	4	3	3	0	0	0	0	0	1	1	2	0	1	0	0	1	1	0	0	1	1	0	0	0	0	0	0	0	1	1	0	0	0	0	0	0	1	1	0
2	1	3	4	1	1	2	1	9	2	5	2	1	0	0	0	0	0	0	1	2	1	0	1	0	0	1	0	1	0	0	0	0	0	0	0	0	1	1	1	1	0	0	0	0	0	0	1	0	0
2	2	1	4	1	2	1	1	2	4	4	4	3	2	0	0	0	0	0	3	1	2	0	1	0	0	1	0	0	0	0	0	0	1	0	0	0	0	1	0	0	1	0	0	1	0	0	1	1	0
2	1	3	1	1	1	2	1	4	2	5	4	3	2	0	1	0	0	0	3	1	2	0	1	1	0	1	1	0	1	1	0	0	1	0	0	0	0	1	1	1	1	1	1	1	0	0	1	1	0
1	2	2	1	2	1	2	1	3	4	5	2	2	0	0	0	0	0	0	2	1	2	0	1	0	0	1	1	0	0	1	1	0	0	0	0	0	0	0	0	1	1	0	0	1	0	0	0	1	0
2	3	3	4	3	1	3	1	6	5	5	3	2	0	0	0	0	0	0	7	1	2	0	1	0	0	1	1	0	1	1	1	0	0	0	0	0	1	0	0	0	1	1	0	1	0	0	0	1	0
1	1	3	4	1	1	3	1	3	2	5	4	1	0	0	0	0	0	0	2	2	2	0	1	1	0	1	1	0	0	1	0	0	0	0	0	0	0	1	1	0	0	0	1	1	0	0	0	1	0
2	2	3	4	1	1	2	1	3	2	5	4	1	1	0	0	0	0	0	1	2	1	0	1	0	0	1	0	0	0	1	0	0	0	0	0	0	0	0	0	0	0	1	0	0	0	0	0	1	0
2	1	2	4	1	2	1	2	3	1	4	4	1	1	0	0	0	0	0	2	2	1	0	1	0	0	1	1	0	0	0	0	1	0	0	0	0	0	1	0	1	0	0	0	0	0	0	1	1	0
2	3	2	1	3	1	2	1	3	5	5	4	3	3	0	1	0	1	0	3	1	2	0	1	0	0	1	1	0	1	0	0	0	0	0	0	0	0	1	0	0	0	0	0	0	0	1	1	0	0
2	2	1	1	1	1	3	2	3	3	5	4	3	3	0	0	0	0	0	3	1	2	0	1	1	0	1	1	0	1	1	0	0	0	0	0	0	0	1	0	1	1	1	0	0	0	0	0	1	0
1	2	3	4	2	1	2	1	3	3	5	4	3	1	0	0	0	0	0	1	2	1	0	1	0	0	1	0	0	0	1	0	0	0	0	0	0	0	1	1	0	0	0	0	0	0	0	1	0	0
1	2	3	1	2	1	2	1	3	4	5	4	2	0	0	0	0	0	0	3	1	2	0	1	0	0	1	0	0	0	1	0	0	0	0	0	0	0	1	1	0	0	0	0	0	0	0	1	1	0
1	2	3	1	2	1	2	1	3	2	5	4	3	2	0	0	0	0	0	1	2	1	0	1	0	0	1	0	0	0	1	0	0	0	1	1	1	0	0	0	0	0	0	0	0	0	0	1	1	0
2	2	3	1	3	1	4	1	10	4	5	1	2	0	0	0	0	0	0	3	1	2	0	1	0	0	1	0	0	0	0	1	0	0	0	0	0	1	1	1	0	0	0	1	0	0	0	1	0	0
1	3	2	1	2	1	3	1	10	5	5	1	2	1	0	0	0	0	0	5	2	1	0	1	0	0	1	1	0	1	0	0	0	0	0	0	0	0	0	0	0	0	0	1	0	0	0	0	1	0
2	2	3	1	2	1	3	1	10	3	5	1	2	1	0	0	0	0	0	5	2	1	0	1	0	0	1	1	0	1	0	0	0	0	0	0	0	0	0	0	0	0	0	1	0	0	0	0	1	0
1	2	2	1	2	1	3	1	10	4	5	3	1	1	0	0	0	0	0	1	1	1	0	1	0	0	1	0	0	0	0	0	1	0	0	0	0	0	0	0	1	0	0	0	0	1	0	0	0	0
1	1	2	4	1	2	1	1	10	2	5	4	1	0	0	0	0	0	0	4	2	2	1	0	1	0	0	0	1	0	0	0	1	0	0	0	0	0	0	1	0	0	0	0	0	0	0	1	0	0
2	6	2	4	1	2	2	1	10	2	5	1	1	0	0	0	0	0	0	5	2	1	0	1	0	0	1	1	0	0	1	1	0	0	0	0	0	0	1	0	0	0	0	0	0	0	0	1	0	0
2	1	2	4	1	1	3	1	10	3	5	1	1	0	0	0	0	0	0	5	1	2	0	1	0	0	1	0	0	0	0	0	0	1	0	0	0	1	0	1	0	0	1	0	0	1	0	1	0	0
1	2	2	1	2	1	2	1	10	3	5	4	1	0	0	0	0	0	0	5	2	1	0	1	0	0	1	1	0	0	1	0	0	0	0	0	0	0	0	0	1	0	0	0	0	0	0	0	0	0
2	1	1	4	1	1	2	2	1	2	5	4	2	0	0	0	0	0	0	1	1	2	0	1	0	0	1	0	0	0	1	0	0	0	0	0	0	0	0	0	0	0	0	0	0	0	1	0	1	0
1	6	1	4	3	1	4	1	1	5	5	4	3	3	0	0	0	0	0	1	2	1	0	1	0	0	1	0	0	1	1	0	0	1	0	0	0	1	1	0	1	0	0	0	0	1	1	1	1	0
2	1	2	4	1	1	2	2	1	3	5	4	2	0	0	0	0	0	0	1	2	1	0	1	0	0	1	0	0	1	0	0	0	0	0	0	0	0	1	0	0	0	0	0	0	0	0	1	0	0
2	2	1	4	1	1	2	2	1	4	5	4	1	0	0	0	0	0	0	1	2	2	0	1	0	0	1	0	0	0	1	0	0	0	0	0	0	1	0	0	1	0	0	1	0	0	0	0	1	0
2	2	2	1	2	1	3	1	1	3	5	4	3	2	0	0	1	0	0	1	2	2	0	1	0	0	1	0	0	0	0	1	0	0	0	0	0	1	0	0	0	0	0	0	0	0	0	1	1	0
2	2	3	4	2	1	2	1	1	3	5	4	1	0	0	0	0	0	0	3	1	2	0	1	0	0	1	1	0	1	0	0	0	0	0	0	0	1	1	0	0	1	0	0	0	0	0	0	1	0
1	3	2	1	2	1	2	1	1	4	5	4	3	3	0	2	1	0	0	7	2	2	0	1	0	0	1	0	0	0	0	0	1	0	0	0	0	0	0	0	0	0	0	0	0	0	1	1	0	0
2	1	2	1	1	2	2	2	1	3	5	4	2	1	0	0	0	0	0	1	1	1	0	1	0	0	0	1	0	0	1	0	0	0	0	0	0	0	1	0	1	0	0	0	0	0	0	1	0	0
2	1	3	4	2	2	2	1	2	1	3	4	1	1	0	0	0	0	0	2	1	2	0	0	0	1	1	1	0	0	1	0	0	0	0	0	0	0	1	0	0	0	0	0	0	0	0	0	1	0
2	6	2	1	3	1	3	1	6	5	5	2	3	2	0	0	0	0	0	2	1	2	0	1	1	0	1	1	0	0	1	0	0	0	0	0	0	0	1	0	0	0	0	0	0	0	0	1	1	0
2	1	1	4	1	1	1	2	10	2	5	4	1	1	0	0	0	0	0	2	1	2	0	1	0	0	1	0	0	1	0	0	0	0	0	0	0	0	1	0	0	1	0	0	1	1	0	1	1	0
2	2	2	1	2	1	2	2	9	4	5	4	2	3	0	0	0	0	0	2	1	2	0	1	0	0	1	1	1	1	0	0	0	0	0	1	0	1	1	0	0	0	0	0	0	0	0	1	1	0
2	2	1	1	1	1	2	2	9	4	5	4	1	0	0	0	0	0	0	2	1	2	0	1	1	0	1	1	0	0	1	1	0	0	0	0	0	1	1	0	0	0	0	0	1	0	0	1	1	0
2	1	2	4	1	1	2	1	1	3	5	4	2	0	0	0	0	0	0	2	1	2	0	1	0	0	1	1	0	1	1	0	1	0	0	0	0	0	1	0	0	1	0	1	1	0	0	0	0	1
2	3	2	1	2	1	2	2	9	5	5	4	3	0	0	0	0	0	0	4	1	2	0	1	0	0	1	1	0	0	1	0	0	0	0	0	0	0	1	1	1	0	0	0	0	0	0	0	0	0
1	2	3	1	2	1	3	1	3	3	5	4	1	0	0	0	0	0	0	3	1	2	0	1	0	0	1	1	0	0	1	0	1	0	1	1	0	0	0	0	0	1	0	0	0	0	0	0	1	0
1	2	3	1	1	2	2	1	6	2	5	4	2	1	0	0	0	0	0	2	3	2	0	1	1	0	1	1	0	0	1	0	0	0	0	0	0	0	0	0	0	0	0	1	1	0	0	0	1	0
1	1	2	1	1	2	2	3	10	3	5	4	3	3	0	0	0	0	0	2	1	2	0	1	1	0	1	1	0	0	1	0	0	0	0	0	0	1	0	0	1	0	0	0	0	1	0	0	1	0
2	1	1	1	1	2	1	2	1	3	5	4	1	2	0	0	0	0	0	2	1	2	0	1	1	0	1	1	0	0	1	0	0	0	0	0	0	0	1	1	0	0	0	0	0	0	0	0	0	0
2	1	1	4	1	2	2	2	1	3	4	4	1	1	0	0	0	0	0	2	1	2	0	1	1	0	1	1	0	0	1	0	0	0	0	0	0	0	0	0	1	1	1	0	0	0	0	0	0	0
2	2	2	1	1	2	1	2	1	3	4	3	1	0	0	0	0	0	0	2	1	2	0	1	1	0	1	1	0	0	1	0	0	0	0	0	0	0	0	1	0	0	1	1	0	0	0	0	0	0
2	2	2	1	1	2	2	2	1	3	4	4	1	1	0	0	0	0	0	2	1	2	0	1	1	0	1	1	0	0	1	0	0	0	0	1	0	0	0	0	0	1	0	0	1	0	0	1	1	0
2	1	3	4	1	1	1	1	3	2	5	2	3	1	0	0	0	0	0	2	1	2	0	1	1	0	1	1	0	0	1	0	0	0	0	0	0	0	1	1	0	0	0	0	0	0	0	0	1	0
2	1	1	1	1	2	2	2	2	3	5	4	2	2	0	0	0	0	0	2	1	2	0	1	1	0	1	1	0	0	1	0	0	0	0	0	0	0	1	0	0	1	0	0	0	1	0	1	1	0
2	2	2	1	1	2	2	2	2	3	5	4	2	2	0	0	0	0	0	2	1	2	0	1	1	0	1	1	0	0	1	0	0	0	0	0	0	0	0	0	0	0	0	0	0	1	0	1	1	0
2	2	2	1	1	2	2	2	4	3	5	4	2	1	0	0	0	0	0	2	2	1	1	1	1	0	1	1	0	0	1	0	0	0	0	0	0	0	0	0	0	0	0	0	1	0	0	0	0	1
2	1	1	1	1	2	2	2	9	3	5	4	2	2	0	0	0	0	0	2	1	2	0	1	1	0	1	1	0	0	1	0	0	0	0	0	0	0	0	1	0	0	0	1	0	0	0	0	0	0
2	1	2	4	1	2	2	2	9	1	5	4	2	0	0	0	0	0	0	2	2	1	0	1	1	0	1	1	0	0	1	0	0	0	0	0	1	1	0	0	0	0	0	0	0	0	0	0	0	0
2	1	2	1	1	2	1	2	2	2	4	3	1	0	0	0	0	0	0	2	1	1	0	1	1	0	1	1	0	0	1	0	0	0	1	1	0	0	0	0	0	0	0	0	0	0	0	0	0	0
2	1	2	1	1	2	2	2	9	2	5	4	2	0	0	0	0	0	0	2	1	2	0	1	0	0	1	1	0	0	1	0	0	0	0	1	0	0	0	0	0	0	0	0	0	1	0	0	0	0
2	1	1	4	1	2	2	2	9	2	5	1	1	1	0	0	0	0	0	2	1	2	0	1	1	0	1	1	0	0	1	0	0	0	0	0	0	0	0	0	0	0	0	0	1	1	0	0	0	0
2	3	2	1	3	1	3	1	4	5	5	3	1	1	0	0	0	0	0	2	1	2	0	1	1	0	1	1	0	0	1	0	0	0	0	0	0	0	0	0	0	1	0	1	0	0	0	1	1	0
2	2	3	1	1	1	1	1	2	2	4	2	2	1	0	0	0	0	0	2	1	2	0	1	1	0	1	1	0	0	1	0	0	0	0	0	0	0	0	0	1	1	1	0	0	0	0	0	0	1
2	2	2	1	2	1	2	1	2	3	5	3	3	0	0	0	0	0	0	2	1	2	0	1	1	0	1	1	0	0	1	0	0	0	0	0	0	1	0	0	0	0	0	0	0	0	0	0	0	1
2	3	1	1	2	1	2	2	1	5	4	4	2	3	0	0	0	0	0	2	1	2	0	1	1	0	1	1	0	0	1	0	0	0	0	0	0	0	0	1	1	0	0	0	0	0	0	1	0	1
2	1	3	4	1	1	1	1	6	2	5	3	1	1	0	0	0	0	0	2	1	2	0	1	1	0	1	1	0	0	1	0	0	0	0	0	1	1	0	0	0	0	0	0	0	0	0	1	1	0
1	1	3	1	1	1	1	1	2	2	5	4	3	1	0	0	0	0	0	2	1	2	0	1	1	0	1	1	0	0	1	0	0	0	0	0	0	0	0	1	0	0	0	0	0	0	0	1	1	0
1	3	3	1	3	1	3	1	10	5	4	2	1	0	0	0	0	0	0	2	1	2	0	1	1	0	1	1	0	0	1	0	0	0	0	0	0	0	1	0	0	0	0	0	0	0	0	0	0	1
1	2	3	1	2	1	2	1	2	3	5	3	3	2	0	0	0	0	0	2	1	2	0	1	1	0	1	1	0	0	1	0	0	0	0	0	0	0	0	0	1	1	0	0	0	0	0	0	0	0
2	2	2	1	1	1	2	1	2	3	5	4	3	0	0	0	0	0	0	2	1	2	0	1	1	0	1	1	0	0	1	0	0	0	0	0	0	0	0	0	0	1	0	0	0	0	0	0	0	0
2	2	2	1	2	1	2	1	6	3	5	4	1	1	0	0	0	0	0	2	1	2	0	1	1	0	1	1	0	0	1	0	0	0	0	0	0	0	0	0	0	0	1	1	0	0	0	0	0	0
1	2	2	1	1	2	2	1	6	3	5	4	1	0	0	0	0	0	0	2	1	2	0	1	1	0	1	1	0	0	1	0	0	0	0	0	0	0	0	0	0	0	0	0	1	0	0	0	0	0
2	2	2	1	1	1	2	1	1	2	4	4	1	1	0	0	0	0	0	2	1	2	0	1	1	0	1	1	0	0	1	0	0	0	1	1	0	0	0	0	0	0	0	0	0	0	0	0	0	0
1	2	2	1	1	1	2	1	1	3	4	3	1	1	0	0	0	0	0	2	1	2	0	1	1	0	1	1	0	0	1	0	0	0	0	1	0	0	0	0	0	0	0	0	0	0	0	0	0	0
2	2	2	1	2	2	2	2	3	3	4	4	1	0	0	0	0	0	0	2	1	2	0	1	1	0	1	1	0	0	1	0	0	0	0	0	1	1	0	0	0	0	0	0	0	0	0	0	0	0
2	3	2	1	2	1	2	2	3	5	4	2	1	0	0	0	0	0	0	2	1	2	0	1	1	0	1	1	0	0	1	0	0	0	0	0	0	1	1	0	0	0	0	0	0	0	0	0	0	1
2	2	2	1	2	1	3	3	10	3	4	4	1	1	0	0	0	0	0	2	1	2	0	1	1	0	1	1	0	0	1	0	0	0	0	0	0	0	1	1	1	0	0	0	0	0	0	1	1	0
1	6	2	1	3	1	2	3	10	5	5	4	1	1	0	0	0	0	0	2	1	2	0	1	1	0	1	1	0	0	1	0	0	0	0	0	0	0	0	1	1	1	0	0	0	0	0	1	1	0
2	2	2	1	1	1	2	2	3	3	5	4	1	1	0	0	0	0	0	2	1	2	0	1	1	0	1	1	0	0	1	0	0	0	0	0	0	0	0	0	1	0	1	0	1	0	0	0	1	0
2	1	2	1	1	1	2	2	3	3	5	4	1	1	0	0	0	0	0	2	1	2	0	1	1	0	1	1	0	0	1	0	0	0	0	1	0	0	0	0	0	1	0	0	0	0	0	1	1	0
2	1	2	1	1	1	2	2	10	2	5	4	1	1	0	0	0	0	0	2	1	2	0	1	1	0	1	1	0	0	1	0	0	0	0	0	1	1	1	0	0	0	0	0	0	0	0	0	0	0
2	3	2	1	3	1	2	2	2	3	5	4	1	0	0	0	0	0	0	4	1	2	0	1	1	0	1	1	0	0	1	0	0	0	0	0	0	0	1	1	1	0	0	0	0	0	0	0	0	0
2	2	2	1	1	1	2	2	10	3	5	4	1	0	0	1	0	0	0	2	1	2	0	1	1	0	1	1	0	0	1	0	0	0	0	0	0	0	0	1	1	0	0	1	1	0	0	0	0	0
2	1	2	1	2	1	2	2	9	2	5	4	1	1	0	0	0	0	0	2	1	2	0	1	1	0	1	1	0	0	1	0	0	0	0	0	0	1	1	1	0	1	0	0	0	0	0	0	0	0
2	1	3	1	1	1	2	2	9	3	4	4	1	1	0	0	0	0	0	2	1	2	0	1	1	0	1	1	0	0	1	0	0	0	0	0	0	0	0	1	1	1	0	0	0	0	0	1	1	0
2	1	2	1	1	1	2	2	1	3	5	4	1	1	0	0	0	0	0	2	1	2	0	1	1	0	1	1	0	0	1	0	0	0	0	0	0	0	0	0	0	1	1	1	1	1	0	1	1	0
2	1	1	4	1	1	1	2	6	2	5	4	1	1	0	0	0	0	0	2	1	2	0	1	1	0	1	1	0	0	1	0	0	0	0	0	0	0	0	1	1	0	0	1	0	0	0	0	0	0
2	3	2	1	2	1	3	2	6	5	5	4	1	1	0	0	0	0	0	2	1	2	0	1	1	0	1	1	0	0	1	0	0	0	0	0	0	0	0	0	0	1	0	1	0	0	0	0	0	0
2	1	2	1	1	1	2	2	6	3	5	4	1	1	0	0	0	0	0	2	1	2	0	1	1	0	1	1	0	0	1	0	0	0	0	0	0	0	1	1	1	0	0	0	0	0	0	1	1	0
2	1	2	1	1	1	2	2	6	3	5	3	1	1	0	0	0	0	0	2	1	2	0	1	1	0	1	1	0	0	1	0	0	0	0	1	1	1	1	0	0	0	0	0	0	0	0	1	1	0
2	1	2	1	1	1	2	2	6	3	5	4	1	1	0	0	0	0	0	2	1	2	0	1	1	0	1	1	0	0	1	0	0	0	0	0	0	1	1	0	0	0	0	0	0	0	0	0	0	0
2	1	2	1	1	1	2	2	6	3	5	4	1	1	0	0	0	0	0	2	1	2	0	1	1	0	1	1	0	0	1	0	0	0	0	0	0	0	0	1	1	0	0	0	0	0	0	0	0	0
2	1	3	1	1	1	2	2	6	3	5	4	1	1	0	0	0	0	0	2	1	2	0	1	1	0	1	1	0	0	1	0	0	0	0	0	0	0	0	1	1	0	0	0	0	0	0	0	0	0
2	2	3	1	1	1	1	1	6	1	5	4	1	1	0	0	0	0	0	2	1	2	0	1	1	0	1	1	0	0	1	0	0	0	0	0	0	0	0	0	0	1	1	0	0	0	0	1	1	0
2	1	3	1	1	2	2	1	6	1	5	4	1	1	0	0	0	0	0	2	1	2	0	1	1	0	1	1	0	0	1	0	0	0	0	0	0	0	0	0	0	1	1	1	1	0	0	1	1	0
2	2	2	1	1	1	2	2	1	3	5	4	1	1	0	0	0	0	0	2	1	2	0	1	1	0	1	1	0	0	1	0	0	0	0	0	0	0	0	0	0	0	0	1	1	0	0	0	0	0
2	1	2	1	1	1	2	2	9	3	4	4	1	1	0	0	0	0	0	2	1	2	0	1	1	0	1	1	0	0	1	0	0	0	0	0	0	0	0	0	0	1	0	1	0	1	0	0	0	0
2	1	2	1	1	1	2	2	9	3	5	4	1	1	0	0	0	0	0	2	1	2	0	1	1	0	1	1	0	0	1	0	0	0	0	0	0	0	1	1	1	0	0	0	0	0	0	0	0	1
2	1	2	1	1	1	1	2	4	3	5	4	1	1	0	0	0	0	0	2	1	2	0	1	1	0	1	1	0	0	1	0	0	0	0	0	0	0	0	1	1	1	1	0	0	0	0	1	1	0
2	2	2	1	2	1	3	2	2	4	5	4	1	1	0	0	0	0	0	2	1	2	0	1	1	0	1	1	0	0	1	0	0	0	0	0	0	0	0	0	0	1	1	1	0	0	0	1	1	0
2	1	2	1	1	1	2	2	9	1	5	4	1	1	0	0	0	0	0	2	1	2	0	1	1	0	1	1	0	0	1	0	0	0	0	1	1	0	0	0	0	0	0	0	0	0	0	0	0	0
2	2	3	1	2	1	3	1	6	3	5	4	2	1	0	1	0	0	0	2	1	2	0	1	0	0	1	1	0	0	1	0	0	0	0	0	0	0	1	1	1	0	0	0	0	0	0	0	0	0
2	1	3	4	1	1	2	1	2	2	5	4	3	0	0	0	0	0	0	2	1	2	0	1	1	0	1	1	0	0	1	0	0	0	0	0	0	0	1	0	1	0	0	0	0	0	0	0	0	1
2	2	3	1	2	2	1	1	2	3	5	4	1	1	0	0	0	0	0	2	1	2	0	1	1	0	1	1	0	0	1	0	0	0	0	0	0	0	1	0	1	1	0	0	0	0	0	0	0	0
2	6	2	1	3	1	2	2	3	1	5	4	1	1	0	0	0	0	0	2	1	2	0	1	1	0	1	1	0	0	1	0	0	0	0	0	0	0	0	0	0	1	0	0	0	0	0	0	0	0
2	2	2	1	1	1	2	2	3	3	4	4	2	0	0	0	0	0	0	2	1	2	0	1	1	0	1	1	0	0	1	0	0	0	0	0	0	0	0	0	0	1	1	1	1	0	0	0	0	0
2	1	2	1	1	1	2	2	3	3	3	4	1	1	0	0	0	0	0	2	1	2	0	1	1	0	1	1	0	0	1	0	0	0	0	0	0	0	0	0	0	0	1	1	1	0	0	1	1	0
2	1	1	1	1	1	2	2	3	3	5	4	2	0	0	0	0	0	0	2	1	2	0	1	1	0	1	1	0	0	1	0	0	0	0	0	0	0	1	1	1	0	0	0	0	0	0	1	1	0
2	1	1	4	1	2	2	2	3	2	4	4	1	1	0	0	0	0	0	2	1	2	0	1	1	0	1	1	0	0	1	0	0	0	0	0	0	0	1	1	1	0	0	0	0	0	0	0	0	1
2	2	2	1	2	1	2	2	3	5	5	4	1	0	0	0	0	0	0	2	1	2	0	1	1	0	1	1	0	0	1	0	0	0	0	0	0	0	0	0	1	1	1	1	0	0	0	0	0	1
2	2	2	1	2	1	2	2	3	4	4	4	1	0	0	0	0	0	0	2	1	2	0	1	1	0	1	1	0	0	1	0	0	0	0	0	0	0	1	1	1	1	0	0	0	0	0	1	0	0
2	1	2	1	1	1	2	2	3	3	5	4	1	1	0	0	0	0	0	2	1	2	0	1	1	0	1	1	0	0	1	0	0	0	0	0	1	1	0	0	0	1	1	1	1	0	0	1	1	0
1	1	3	1	1	1	2	1	3	2	5	4	2	0	0	0	0	0	0	4	2	1	0	1	0	0	1	0	0	0	1	0	0	0	0	1	0	1	0	0	0	1	0	0	0	0	0	1	1	0
2	1	2	4	1	1	2	2	9	2	5	4	1	1	0	0	0	0	0	2	1	2	0	1	1	0	1	1	0	0	1	0	0	0	1	1	0	0	0	0	0	0	0	0	0	0	0	0	0	0
2	1	2	1	3	1	2	2	10	3	5	4	1	0	0	0	0	0	0	4	1	2	0	1	1	0	1	1	0	0	1	0	0	0	0	0	0	0	1	1	0	0	0	0	0	0	0	1	1	0
1	1	3	4	3	1	2	3	9	2	5	3	1	0	0	0	0	0	0	2	1	2	0	1	1	0	1	1	0	0	1	0	0	0	1	1	0	0	0	0	0	1	0	0	0	0	0	1	1	0
2	1	2	4	1	1	3	1	6	2	5	1	3	0	0	0	0	0	0	2	1	2	0	1	1	0	1	1	0	0	1	0	0	0	0	0	0	0	0	0	0	0	1	1	1	0	0	1	1	0
2	1	2	4	1	1	3	1	6	2	5	1	2	2	0	0	0	0	0	2	1	2	0	1	1	0	1	1	0	0	1	0	0	0	0	0	0	0	0	1	1	1	0	0	0	0	0	0	0	0
2	1	2	4	1	1	2	2	2	2	4	4	3	0	0	0	0	0	0	2	1	2	0	1	1	0	1	1	0	0	1	0	0	0	0	0	0	1	1	0	0	0	0	0	0	0	0	1	1	0
2	2	2	4	2	1	2	2	9	3	4	4	2	0	0	0	0	0	0	2	1	2	0	1	1	0	1	1	0	0	1	0	0	0	0	0	0	0	0	1	1	0	1	0	0	0	0	1	1	0
2	1	2	1	1	1	3	2	2	3	5	4	1	0	0	0	0	0	0	2	1	2	0	1	1	0	1	1	0	0	1	0	0	0	0	0	0	0	0	0	0	0	1	0	0	0	0	1	1	0
2	1	3	1	1	1	3	1	2	2	5	4	1	0	0	0	0	0	0	2	1	2	0	1	1	0	1	1	0	0	1	0	0	0	0	0	0	0	0	0	0	0	0	1	1	1	0	1	1	0
1	1	3	1	1	1	3	1	3	2	5	4	2	2	0	0	0	0	0	2	1	2	0	1	1	0	1	1	0	0	1	0	0	0	0	0	0	0	0	0	0	0	1	1	1	0	0	0	0	0
2	1	2	4	1	1	3	2	9	3	5	4	1	0	0	0	0	0	0	2	1	2	0	1	1	0	1	1	0	0	1	0	0	0	0	0	0	0	0	0	0	1	1	1	1	0	0	0	0	0
2	3	2	1	3	1	4	1	9	4	4	4	3	3	0	0	0	0	0	1	1	1	0	1	0	0	1	0	0	0	1	0	0	0	0	0	0	0	0	1	1	0	0	1	1	1	0	0	0	0
2	1	1	1	2	1	3	2	3	3	5	4	3	1	0	0	1	0	0	2	1	2	0	1	1	0	1	1	0	0	1	0	0	0	0	0	0	0	0	1	1	1	0	0	0	0	0	1	1	0
2	1	1	4	1	2	2	2	1	2	4	4	1	0	0	0	0	0	0	5	2	2	0	1	0	0	1	1	0	1	0	0	0	0	0	0	0	1	1	1	0	0	0	0	0	0	0	1	1	0
2	1	1	1	2	1	4	2	1	3	5	4	3	3	0	2	0	0	0	2	1	2	0	1	1	0	1	1	0	0	1	0	0	0	0	0	0	0	1	1	0	0	0	0	0	0	0	1	1	0
2	1	1	1	1	2	4	3	10	2	5	4	1	0	0	0	0	0	0	1	2	1	0	1	0	0	0	1	0	1	0	0	0	0	0	0	0	0	0	0	1	1	1	0	0	0	0	1	1	0
2	3	1	4	2	1	4	3	10	5	5	4	3	2	0	0	0	0	0	2	1	2	0	1	1	0	1	1	0	0	1	0	0	0	0	0	0	0	0	0	0	1	1	0	0	0	0	1	1	0
2	2	2	1	1	2	2	2	2	3	4	4	2	1	0	0	0	0	0	2	1	2	0	1	1	0	1	1	0	0	1	0	0	0	0	0	0	0	0	0	0	1	0	1	1	0	0	0	0	0
2	2	2	1	1	1	2	2	10	4	4	4	3	0	0	0	0	0	0	2	1	2	0	1	1	0	1	1	0	0	1	0	0	0	0	0	0	0	0	0	0	1	0	0	1	0	0	0	0	0
2	6	1	1	2	1	2	2	9	5	4	4	1	0	0	0	0	0	0	2	1	2	0	1	1	0	1	1	0	0	1	0	0	0	0	0	0	0	0	0	0	0	1	1	0	0	0	1	1	0
2	2	2	1	1	1	2	2	3	4	5	4	1	0	0	0	0	0	0	2	1	2	0	1	1	0	1	1	0	0	1	0	0	0	0	0	0	0	0	1	1	1	0	0	0	0	0	1	1	0
2	3	1	1	2	1	2	2	9	5	5	4	3	0	0	0	0	0	0	2	1	2	0	1	1	0	1	1	0	0	1	0	0	0	0	0	0	0	1	1	1	1	0	0	0	0	0	0	0	0
2	2	2	1	1	1	2	2	9	3	4	1	2	0	0	0	0	0	0	2	1	2	0	1	1	0	1	1	0	0	1	0	0	0	0	0	0	0	0	0	1	1	0	1	1	0	0	0	0	0
2	2	2	1	2	1	2	2	3	4	5	4	2	0	0	0	0	0	0	2	1	2	0	1	1	0	1	1	0	0	1	0	0	0	0	0	0	0	0	0	1	0	1	1	0	0	0	0	0	0
2	2	2	1	2	1	2	2	3	4	4	3	2	0	0	0	0	0	0	2	1	2	0	1	1	0	1	1	0	0	1	0	0	0	0	0	0	0	1	1	0	0	0	0	0	0	0	1	0	0
2	3	2	1	2	1	2	2	2	5	5	4	1	0	0	0	0	0	0	2	1	2	0	1	1	0	1	1	0	0	1	0	0	0	0	0	0	0	0	1	1	1	0	0	0	0	0	1	1	0
2	3	2	1	3	1	3	2	2	5	4	4	1	0	0	0	0	0	0	2	1	2	0	1	1	0	1	1	0	0	1	0	0	0	0	0	0	0	0	0	0	1	1	1	1	0	0	1	1	0
2	3	2	1	2	1	2	2	2	5	5	3	2	0	0	0	0	0	0	2	1	2	0	1	1	0	1	1	0	0	1	0	0	0	0	0	0	0	0	0	0	1	1	1	0	0	0	0	0	0
2	1	2	4	1	1	1	1	6	2	5	3	1	0	0	0	0	0	0	2	1	2	0	1	1	0	1	1	0	0	1	0	0	0	0	0	0	0	1	1	1	1	0	0	0	0	0	0	0	0
2	1	2	4	1	2	2	2	9	2	4	4	3	3	0	0	0	0	0	2	1	2	0	1	1	0	1	1	0	0	1	0	0	0	0	0	0	0	1	1	0	0	0	0	0	0	0	0	0	0
2	2	1	1	1	2	2	2	9	3	3	4	1	0	0	0	0	0	0	2	1	2	0	1	1	0	1	1	0	0	1	0	0	0	0	1	1	1	0	0	0	0	0	0	0	0	0	1	1	0
2	1	3	4	1	1	2	1	2	2	5	3	2	0	0	0	0	0	0	2	2	1	0	1	1	0	1	1	0	0	1	0	0	0	1	1	0	0	0	0	0	1	0	0	0	0	0	1	1	0
2	2	1	1	1	2	2	2	2	4	5	4	3	0	0	0	0	0	0	2	1	2	0	1	1	0	1	1	0	0	1	0	0	0	1	1	0	0	0	0	0	0	0	0	0	0	0	0	0	0
2	1	1	4	1	2	2	2	2	2	5	4	3	0	0	0	0	0	0	2	1	2	0	1	1	0	1	1	0	0	1	0	0	0	0	0	0	1	1	1	1	0	0	0	0	0	0	0	0	0
1	1	2	1	1	1	3	1	3	2	5	4	2	1	0	0	0	0	0	2	1	2	0	1	1	0	1	1	0	0	1	0	0	0	0	0	0	0	1	1	1	0	0	0	0	0	0	1	1	0
1	6	2	1	3	1	3	1	3	5	5	4	3	1	0	0	0	0	0	1	1	2	0	1	0	0	1	1	0	0	1	0	0	0	0	0	0	0	0	1	0	1	0	0	0	0	0	0	0	1
2	2	1	1	1	2	1	2	3	3	5	4	3	2	0	0	0	0	0	2	1	2	0	1	1	0	1	1	0	0	1	0	0	0	0	0	0	0	0	0	0	0	1	1	1	0	0	0	0	0
1	1	1	1	1	2	2	3	10	2	4	4	1	1	0	0	0	0	0	2	1	2	0	1	1	0	1	1	0	0	1	0	0	0	0	0	0	0	0	0	0	1	1	1	0	0	0	1	1	0
2	2	2	1	2	1	2	3	10	3	5	4	2	0	0	0	0	0	0	2	1	2	0	1	1	0	1	1	0	0	1	0	0	0	0	0	0	0	0	1	1	0	0	0	0	0	0	1	1	0
1	1	1	4	1	1	2	3	10	2	5	4	3	0	0	0	0	0	0	2	1	2	0	1	1	0	1	1	0	0	1	0	0	0	0	0	1	0	1	0	0	0	0	0	0	0	0	0	0	0
1	3	2	1	1	1	2	3	10	5	4	4	3	0	0	0	0	0	0	2	1	2	0	1	1	0	1	1	0	0	1	0	0	0	0	0	0	0	1	0	1	1	0	0	0	0	0	1	1	0
1	2	2	1	2	1	2	1	10	3	5	4	2	0	0	0	0	0	0	2	1	2	0	1	1	0	1	1	0	0	1	0	0	0	0	0	0	0	0	0	0	0	1	1	1	0	0	0	0	1
1	3	2	1	2	1	3	1	10	3	5	4	1	1	0	0	0	0	0	2	1	2	0	1	1	0	1	1	0	0	1	0	0	0	0	0	0	0	0	0	1	1	0	1	0	0	0	0	1	0
1	2	2	1	1	1	2	1	10	3	5	4	2	0	0	0	0	0	0	2	1	2	0	1	1	0	1	1	0	0	1	0	0	0	0	0	0	0	0	0	0	1	0	1	1	0	0	0	0	0
2	2	2	1	2	1	2	2	6	4	5	4	1	0	0	0	0	0	0	4	1	2	0	1	1	0	1	1	0	0	1	0	0	0	0	0	0	0	0	0	0	0	1	0	1	1	0	1	1	0
2	3	2	1	3	1	3	2	6	5	4	4	3	0	0	0	0	0	0	2	1	2	0	1	1	0	1	1	0	0	1	0	0	0	0	0	0	0	0	1	1	0	0	0	0	0	0	1	1	0
1	2	2	1	2	1	2	1	2	3	5	4	1	0	0	0	0	0	0	2	1	2	0	1	1	0	1	1	0	0	1	0	0	0	0	0	0	0	0	0	0	1	1	1	1	1	0	1	1	0
2	2	3	1	1	1	1	1	3	3	4	4	0	1	0	0	0	0	0	2	1	2	0	1	1	0	1	1	0	0	1	0	0	0	0	0	0	0	1	1	1	0	0	0	0	0	0	0	1	0
2	2	2	1	1	1	2	2	10	3	4	4	3	3	0	0	0	0	0	2	1	2	0	1	1	0	1	1	0	0	1	0	0	0	0	0	0	0	1	0	1	1	1	0	0	0	0	0	1	0
2	1	2	4	1	1	3	2	10	2	4	4	3	0	0	0	0	0	0	2	1	2	0	1	1	0	1	1	0	0	1	0	0	0	0	0	0	0	0	1	0	0	1	1	0	0	0	0	1	0
2	1	2	4	1	1	1	2	2	2	4	4	0	1	0	0	0	0	0	2	1	2	0	1	1	0	1	1	0	0	1	0	0	0	0	0	0	0	1	1	0	0	0	0	0	0	0	0	0	0
2	2	2	1	2	1	2	2	2	4	5	4	2	0	0	0	0	0	0	2	1	2	0	1	1	0	1	1	0	0	1	0	0	0	0	0	0	0	0	0	1	1	0	0	0	0	0	0	0	0
2	2	2	1	2	1	2	2	2	2	5	3	1	0	0	0	0	0	0	2	1	2	0	1	1	0	1	1	0	0	1	0	0	0	1	1	0	0	0	0	0	0	0	0	0	0	0	0	0	0
2	1	2	1	1	1	3	2	2	3	5	4	3	3	0	0	0	0	0	4	1	2	0	1	1	0	1	1	0	0	1	0	0	0	1	1	0	0	0	0	0	1	0	0	0	0	0	0	0	0
2	6	1	1	2	2	2	2	1	5	4	4	3	3	0	0	0	0	0	2	1	2	0	1	1	0	1	1	0	0	1	0	0	0	0	0	0	0	1	0	0	1	0	0	0	0	0	0	0	0
2	6	1	1	2	2	1	2	1	2	4	4	1	1	0	0	0	0	0	2	1	2	0	1	1	0	1	1	0	0	1	0	0	0	0	0	0	0	1	1	0	0	0	0	0	0	0	0	0	0
2	1	2	1	1	2	1	2	2	3	5	4	1	0	0	0	0	0	0	2	1	2	0	1	1	0	1	1	0	0	1	0	0	0	0	0	0	0	0	1	1	1	0	0	0	0	0	1	1	0
1	2	3	1	1	1	2	1	3	2	5	4	0	1	0	0	0	0	0	2	1	2	0	1	1	0	1	1	0	0	1	0	0	0	0	0	0	0	0	1	0	0	1	0	0	0	0	1	0	0
2	3	3	1	3	1	2	1	4	4	5	4	3	2	0	0	0	0	0	2	1	2	0	1	1	0	1	1	0	0	1	0	0	0	0	0	0	0	0	0	0	1	1	1	0	0	0	0	0	0
2	2	2	1	1	2	2	2	4	3	4	1	1	0	0	0	0	0	0	2	1	2	0	1	1	0	1	1	0	0	1	0	0	0	0	0	0	0	1	1	1	0	1	0	0	0	0	0	0	0
2	2	2	1	2	1	2	2	3	4	5	1	1	0	0	0	0	0	0	2	1	2	0	1	1	0	1	1	0	0	1	0	0	0	0	0	0	0	1	1	0	0	1	0	0	0	0	0	1	0
2	1	1	4	1	2	1	2	1	1	4	4	3	0	0	0	0	0	0	2	1	2	0	1	1	0	1	1	0	0	1	0	0	0	0	0	0	0	0	0	0	0	1	1	0	0	0	1	0	0
2	1	3	4	1	1	2	1	2	2	5	4	1	0	0	0	0	0	0	2	1	2	0	1	1	0	1	1	0	0	1	0	0	0	0	0	0	0	0	0	0	0	0	1	0	0	0	0	1	0
2	2	2	1	3	1	3	2	2	3	5	4	3	0	0	0	0	0	0	2	1	2	0	1	1	0	1	1	0	0	1	0	0	0	0	0	0	0	0	0	0	1	0	1	1	0	0	0	0	0
1	3	2	1	3	1	3	1	9	3	4	4	2	1	0	0	0	0	0	2	1	2	0	1	1	0	1	1	0	0	1	0	0	0	0	0	0	0	0	0	0	0	0	0	1	0	0	0	1	0
1	2	2	1	1	1	2	1	9	4	4	4	2	0	0	0	0	0	0	2	1	2	0	1	1	0	1	1	0	0	1	0	0	0	0	0	0	0	0	0	0	0	1	1	1	0	0	0	0	1
2	1	2	4	1	2	1	2	9	2	5	3	2	1	0	0	0	0	0	2	1	2	0	1	1	0	1	1	0	0	1	0	0	0	0	0	0	0	0	0	0	1	1	0	0	0	0	0	0	0
2	1	2	1	1	2	2	2	9	3	4	4	0	1	0	0	0	0	0	4	1	2	0	1	1	0	1	1	0	0	1	0	0	0	0	0	0	0	1	1	1	0	0	0	0	0	0	1	0	0
1	3	2	1	2	1	3	1	9	4	4	2	2	0	0	0	0	0	0	2	1	2	0	1	1	0	1	1	0	0	1	0	0	0	0	0	0	0	0	1	1	1	0	0	0	0	0	0	0	0
2	3	1	1	1	1	2	2	6	5	4	2	2	0	0	1	0	0	0	2	1	2	0	1	1	0	1	1	0	0	1	0	0	0	0	0	1	0	0	0	0	0	0	0	0	0	0	0	0	1
2	1	2	4	1	1	2	2	6	3	5	4	1	0	0	0	0	0	0	2	1	2	0	1	1	0	1	1	0	0	1	0	0	0	0	0	0	1	1	0	0	0	0	0	0	0	0	1	1	0
2	2	3	1	2	1	3	1	3	3	5	3	1	0	0	0	0	0	0	2	1	2	0	1	1	0	1	1	0	0	1	0	0	0	1	1	0	0	0	0	0	0	0	0	0	0	0	0	0	0
1	3	2	1	2	1	2	1	10	5	4	4	3	1	0	0	0	0	0	2	1	2	0	1	1	0	1	1	0	0	1	0	0	0	1	1	0	0	0	0	0	0	0	0	0	0	0	0	0	0
1	2	2	1	1	1	2	1	10	3	4	1	3	0	0	0	0	0	0	2	1	2	0	1	1	0	1	1	0	0	1	0	0	0	0	0	1	1	0	0	0	0	0	0	0	0	0	0	0	0
1	3	2	1	3	1	3	1	10	5	4	2	2	3	1	1	1	1	1	2	1	2	0	1	1	0	1	1	0	0	1	0	0	0	0	0	0	1	1	0	0	0	0	0	0	0	0	0	0	0
1	2	3	1	2	1	3	1	10	3	4	2	2	1	0	0	0	0	0	2	1	2	0	1	1	0	1	1	0	0	1	0	0	0	0	0	0	0	1	1	1	0	1	0	0	0	0	0	0	0
2	2	2	1	2	1	3	2	3	4	5	4	3	0	0	0	0	0	0	2	1	2	0	1	1	0	1	1	0	0	1	0	0	0	0	0	0	0	0	0	1	1	1	0	0	0	0	1	1	1
2	6	1	1	2	1	2	2	3	5	4	4	2	0	0	0	0	0	0	2	1	2	0	1	1	0	1	1	0	0	1	0	0	0	0	0	0	0	1	1	1	1	1	1	0	0	0	0	0	1
1	2	3	1	2	1	4	1	3	3	4	2	1	0	0	0	0	0	0	2	1	2	0	1	1	0	1	1	0	0	1	0	0	0	0	0	0	0	1	1	1	1	0	0	0	0	0	1	1	0
1	1	3	4	1	1	1	1	3	1	5	4	2	1	0	0	0	0	0	2	1	2	0	1	1	0	1	1	0	0	1	0	0	0	0	0	0	0	1	0	1	0	0	1	1	0	0	1	1	0
2	3	3	1	3	1	3	1	9	5	5	4	1	0	0	0	0	0	0	2	1	2	0	1	1	0	1	1	0	0	1	0	0	0	0	0	0	0	0	1	0	0	1	0	1	0	0	1	1	0
1	2	3	1	2	1	2	1	3	2	5	4	0	1	0	0	0	0	0	2	1	2	0	1	1	0	1	1	0	0	1	0	0	0	1	1	0	0	0	0	0	1	0	0	0	0	0	1	1	0
1	1	1	4	1	2	1	3	10	2	5	4	0	0	0	0	0	0	0
2	1	1	4	1	2	1	2	10	1	4	4	0	0	0	0	0	0	0
1	6	1	1	1	1	2	3	10	5	5	4	0	0	0	0	0	0	0
1	1	1	4	2	1	2	3	10	2	5	4	0	0	0	0	0	0	0
1	2	2	1	1	1	2	1	10	3	5	3	0	0	0	0	0	0	0
1	3	2	1	2	1	3	1	10	4	5	3	0	0	0	0	0	0	0
2	3	3	1	3	1	3	3	10	5	5	4	0	0	0	0	0	0	0
1	1	2	1	1	2	1	3	10	2	5	4	0	0	0	0	0	0	0
2	2	2	1	1	2	2	2	3	3	5	4	0	0	0	0	0	0	0
2	1	2	4	1	2	2	2	3	2	4	4	0	0	0	0	0	0	0
1	1	3	4	1	1	1	1	3	1	5	1	0	0	0	0	0	0	0
1	2	3	1	1	1	1	1	3	1	5	4	0	0	0	0	0	0	0
2	2	2	1	2	1	2	2	2	5	5	2	0	0	0	0	0	0	0
2	1	2	1	1	2	1	2	2	3	5	4	0	0	0	0	0	0	0
2	2	2	1	2	1	2	2	2	4	5	4	0	0	0	0	0	0	0
2	1	2	1	1	2	2	2	2	2	4	4	0	0	0	0	0	0	0
2	1	3	4	1	1	1	1	2	1	4	4	0	0	0	0	0	0	0
2	1	1	1	1	2	2	1	2	1	3	1	0	0	0	0	0	0	0
2	1	1	4	1	2	2	2	3	1	5	4	0	0	0	0	0	0	0
2	1	1	4	1	2	2	2	3	1	5	4	0	0	0	0	0	0	0
2	2	2	1	1	2	1	2	3	3	5	4	0	0	0	0	0	0	0
2	1	1	1	1	2	2	2	3	1	5	4	0	0	0	0	0	0	0
2	2	2	1	1	1	2	2	3	3	5	4	0	0	0	0	0	0	0
2	1	1	4	1	2	2	2	3	2	5	4	0	0	0	0	0	0	0
2	1	2	1	1	1	1	2	3	3	5	4	0	0	0	0	0	0	0
2	1	1	1	1	2	1	2	3	3	5	4	0	0	0	0	0	0	0
2	1	1	4	1	2	2	2	3	2	4	4	0	0	0	0	0	0	0
2	1	1	1	1	1	2	2	3	3	4	4	0	0	0	0	0	0	0
2	2	2	1	2	1	2	2	3	4	4	4	0	0	0	0	0	0	0
2	2	1	1	2	1	2	2	3	3	4	4	0	0	0	0	0	0	0
2	3	1	1	2	1	2	2	3	4	4	4	0	0	0	0	0	0	0
2	2	1	1	1	2	2	2	3	3	4	4	0	0	0	0	0	0	0
2	1	1	1	1	2	2	2	3	2	4	4	0	0	0	0	0	0	0
2	1	1	1	1	2	2	2	3	3	4	4	0	0	0	0	0	0	0
2	1	2	1	1	1	2	2	3	3	4	4	0	0	0	0	0	0	0
2	1	1	4	1	2	2	2	3	3	4	4	0	0	0	0	0	0	0
2	1	1	1	1	1	2	2	3	3	4	4	0	0	0	0	0	0	0
2	1	1	4	1	2	2	2	3	2	4	4	0	0	0	0	0	0	0
2	1	1	1	1	1	2	2	3	2	4	4	0	0	0	0	0	0	0
2	1	1	1	1	2	2	2	3	2	4	4	0	0	0	0	0	0	0
2	1	2	1	1	2	2	2	3	3	4	4	0	0	0	0	0	0	0
2	1	1	4	1	2	2	2	3	1	4	4	0	0	0	0	0	0	0
2	1	1	1	1	1	2	2	3	3	4	4	0	0	0	0	0	0	0
2	1	1	4	1	2	2	2	3	3	4	4	0	0	0	0	0	0	0
2	2	1	1	1	2	2	2	3	2	4	4	0	0	0	0	0	0	0
2	1	2	4	2	2	1	2	3	1	4	4	0	0	0	0	0	0	0
2	1	1	4	1	2	2	2	9	2	4	1	0	0	0	0	0	0	0
2	1	1	4	1	2	2	2	9	1	5	3	0	0	0	0	0	0	0
2	1	1	4	1	2	1	2	9	1	4	4	0	0	0	0	0	0	0
2	1	1	4	2	1	1	2	3	2	4	4	0	0	0	0	0	0	0
2	1	1	4	1	2	1	2	9	1	4	4	0	0	0	0	0	0	0
2	2	2	1	2	1	2	2	4	5	5	3	0	0	0	0	0	0	0
2	3	2	1	3	1	3	1	2	5	5	4	0	0	0	0	0	0	0
1	1	2	4	1	1	2	1	6	2	5	2	0	0	0	0	0	0	0
1	1	2	4	1	1	2	1	2	2	5	2	0	0	0	0	0	0	0
2	1	2	4	1	2	1	2	1	1	4	4	0	0	0	0	0	0	0
2	2	3	1	1	1	2	1	1	3	5	4	0	0	0	0	0	0	0
2	1	1	4	1	1	1	2	1	2	5	4	0	0	0	0	0	0	0
2	1	1	4	1	1	1	2	1	1	5	4	0	0	0	0	0	0	0
2	1	2	4	1	1	2	2	1	2	4	4	0	0	0	0	0	0	0
2	1	1	4	2	2	2	2	1	1	5	4	0	0	0	0	0	0	0
2	1	1	4	1	2	1	2	6	1	5	4	0	0	0	0	0	0	0
1	2	2	4	2	1	2	3	2	2	4	4	0	0	0	0	0	0	0
1	2	2	1	2	1	3	1	10	4	4	3	0	0	0	0	0	0	0
1	2	2	1	1	1	2	1	2	3	5	4	0	0	0	0	0	0	0
1	1	1	4	1	2	1	1	2	1	5	4	0	0	0	0	0	0	0
2	3	2	1	2	1	3	2	2	5	4	3	0	0	0	0	0	0	0
2	2	2	1	3	1	3	1	6	3	5	4	0	0	0	0	0	0	0
2	2	1	1	1	2	2	2	6	3	5	4	0	0	0	0	0	0	0
2	1	1	1	1	1	2	2	6	3	5	4	0	0	0	0	0	0	0
2	2	2	1	2	1	1	1	1	3	4	4	0	0	0	0	0	0	0
2	1	2	1	1	1	2	2	6	2	5	4	0	0	0	0	0	0	0
2	2	2	1	1	1	1	2	10	2	5	4	0	0	0	0	0	0	0
2	2	2	1	1	2	2	2	10	3	5	4	0	0	0	0	0	0	0
2	2	3	1	2	1	2	1	10	3	5	4	0	0	0	0	0	0	0
1	3	2	1	2	1	3	1	10	5	5	4	0	0	0	0	0	0	0
2	2	2	1	2	1	3	1	10	3	5	4	0	0	0	0	0	0	0
2	2	3	1	1	1	2	1	10	2	5	3	0	0	0	0	0	0	0
2	2	3	4	1	1	2	1	10	2	5	4	0	0	0	0	0	0	0
2	3	2	4	2	1	3	2	9	5	5	4	0	0	0	0	0	0	0
2	1	2	4	1	1	2	2	9	2	4	4	0	0	0	0	0	0	0
2	2	2	1	2	1	3	2	9	3	4	4	0	0	0	0	0	0	0
2	1	3	4	1	1	2	1	9	1	5	4	0	0	0	0	0	0	0
2	1	3	4	1	1	2	1	9	2	5	4	0	0	0	0	0	0	0
2	1	3	1	1	1	2	2	9	3	5	4	0	0	0	0	0	0	0
2	1	3	4	1	1	1	2	9	2	4	4	0	0	0	0	0	0	0
2	1	3	1	1	1	2	2	9	3	4	4	0	0	0	0	0	0	0
2	2	2	1	1	1	2	2	2	3	4	4	0	0	0	0	0	0	0
2	2	2	1	1	1	2	2	2	3	5	4	0	0	0	0	0	0	0
2	2	2	1	2	1	3	2	2	4	5	4	0	0	0	0	0	0	0
2	1	1	1	1	1	2	2	1	3	4	4	0	0	0	0	0	0	0
2	1	2	1	1	1	1	2	1	2	5	4	0	0	0	0	0	0	0
2	1	2	4	1	2	1	2	6	2	5	4	0	0	0	0	0	0	0
2	1	1	4	1	1	1	2	1	1	5	4	0	0	0	0	0	0	0
2	2	2	1	1	1	2	2	1	3	5	4	0	0	0	0	0	0	0
2	2	1	1	2	1	2	2	6	3	5	4	0	0	0	0	0	0	0
2	1	3	4	1	2	2	1	1	2	4	4	0	0	0	0	0	0	0
1	6	2	1	3	1	4	1	9	5	5	2	0	0	0	0	0	0	0
2	1	2	1	1	1	1	2	1	3	5	4	0	0	0	0	0	0	0
2	1	2	4	1	1	2	2	1	2	4	1	0	0	0	0	0	0	0
2	1	1	4	2	1	1	2	1	2	4	4	0	0	0	0	0	0	0
2	1	1	4	2	1	2	2	1	2	5	4	0	0	0	0	0	0	0
2	2	2	1	2	1	3	2	1	3	4	4	0	0	0	0	0	0	0
2	1	2	1	1	1	2	2	1	3	5	1	0	0	0	0	0	0	0
2	2	1	1	1	1	2	2	1	4	4	4	0	0	0	0	0	0	0
2	2	2	1	1	1	2	2	1	3	5	4	0	0	0	0	0	0	0
2	2	3	1	1	1	2	1	6	2	5	4	0	0	0	0	0	0	0
2	1	3	4	1	1	2	1	9	1	5	4	0	0	0	0	0	0	0
2	2	3	4	1	1	1	1	9	1	5	4	0	0	0	0	0	0	0
2	2	2	1	1	1	2	2	6	4	4	4	0	0	0	0	0	0	0
2	1	2	1	1	1	2	2	6	3	5	4	0	0	0	0	0	0	0
2	1	3	1	1	1	2	1	6	3	5	4	0	0	0	0	0	0	0
2	1	2	4	1	1	2	2	6	3	5	4	0	0	0	0	0	0	0
2	3	3	1	3	1	3	1	2	5	5	2	0	0	0	0	0	0	0
2	1	2	4	2	2	2	2	3	1	4	4	0	0	0	0	0	0	0
2	1	3	1	1	1	2	1	3	2	4	2	0	0	0	0	0	0	0
2	1	3	4	1	1	1	1	3	1	5	2	0	0	0	0	0	0	0
2	1	3	4	1	1	2	1	3	2	5	3	0	0	0	0	0	0	0
2	2	2	1	2	1	2	2	2	3	5	4	0	0	0	0	0	0	0
2	1	1	4	1	1	2	2	6	2	4	1	0	0	0	0	0	0	0
2	6	2	1	3	1	3	1	9	3	5	4	0	0	0	0	0	0	0
2	1	2	4	1	1	2	1	9	2	5	4	0	0	0	0	0	0	0
2	1	2	4	1	1	2	1	9	2	4	4	0	0	0	0	0	0	0
2	3	3	1	2	1	4	1	1	4	4	3	0	0	0	0	0	0	0
1	3	2	1	3	1	3	1	1	3	4	3	0	0	0	0	0	0	0
2	3	3	1	2	1	3	1	1	4	4	3	0	0	0	0	0	0	0
2	1	2	4	1	1	2	1	1	2	4	4	0	0	0	0	0	0	0
2	1	2	4	1	1	2	1	1	2	5	4	0	0	0	0	0	0	0
1	6	2	1	3	1	4	1	1	5	4	4	0	0	0	0	0	0	0
2	1	2	1	2	1	3	1	1	3	4	4	0	0	0	0	0	0	0
2	2	2	1	2	1	3	1	1	3	5	3	0	0	0	0	0	0	0
2	1	2	4	1	1	2	1	2	2	4	4	0	0	0	0	0	0	0
2	1	1	1	1	1	3	2	1	2	5	1	0	0	0	0	0	0	0
1	3	3	1	3	1	4	1	1	5	5	3	0	0	0	0	0	0	0
2	2	3	4	2	1	3	1	1	3	5	3	0	0	0	0	0	0	0
2	2	2	1	2	1	3	1	1	3	4	3	0	0	0	0	0	0	0
2	1	1	4	1	1	1	1	9	1	4	2	0	0	0	0	0	0	0
2	2	2	1	2	1	2	1	9	3	4	4	0	0	0	0	0	0	0
2	1	2	4	1	1	1	1	9	1	4	4	0	0	0	0	0	0	0
2	1	2	4	1	1	1	1	10	1	4	4	0	0	0	0	0	0	0
2	2	2	1	2	1	3	1	9	3	4	4	0	0	0	0	0	0	0
2	3	3	1	2	1	4	1	9	4	5	4	0	0	0	0	0	0	0
2	1	2	4	1	2	1	1	9	2	4	4	0	0	0	0	0	0	0
2	1	2	4	1	2	1	1	2	1	5	4	0	0	0	0	0	0	0
2	1	2	4	1	2	1	1	6	1	5	1	0	0	0	0	0	0	0
2	1	2	4	1	2	1	1	2	1	5	1	0	0	0	0	0	0	0
2	2	2	1	2	1	3	2	6	3	5	1	0	0	0	0	0	0	0
2	2	2	1	2	1	3	2	6	3	5	1	0	0	0	0	0	0	0
2	2	1	1	2	1	2	2	6	2	4	1	0	0	0	0	0	0	0
2	2	2	1	2	2	1	2	6	2	4	1	0	0	0	0	0	0	0
2	1	2	4	1	1	1	1	6	2	3	2	0	0	0	0	0	0	0
2	2	2	1	1	1	2	1	6	2	3	2	0	0	0	0	0	0	0
2	1	2	4	1	1	1	1	6	1	4	1	0	0	0	0	0	0	0
2	1	2	4	1	2	1	2	6	2	5	4	0	0	0	0	0	0	0
2	1	2	1	1	2	2	2	6	3	5	4	0	0	0	0	0	0	0
2	1	2	1	1	2	1	2	6	3	5	4	0	0	0	0	0	0	0
2	1	2	4	1	2	1	1	6	1	4	2	0	0	0	0	0	0	0
2	1	2	4	1	2	1	1	3	1	5	4	0	0	0	0	0	0	0
2	2	2	1	2	1	2	2	6	3	5	1	0	0	0	0	0	0	0
2	2	1	1	1	1	2	2	6	2	4	1	0	0	0	0	0	0	0
2	1	2	4	1	2	1	2	6	2	5	4	0	0	0	0	0	0	0
2	1	2	4	1	2	2	2	6	2	4	4	0	0	0	0	0	0	0
2	1	1	4	1	2	2	2	6	2	5	4	0	0	0	0	0	0	0
1	1	2	4	1	1	1	1	6	2	5	4	0	0	0	0	0	0	0
2	1	2	4	1	1	2	2	6	2	5	4	0	0	0	0	0	0	0
2	1	2	4	1	1	2	2	6	2	5	4	0	0	0	0	0	0	0
2	1	2	4	1	2	1	2	6	2	4	4	0	0	0	0	0	0	0
2	1	1	4	1	2	2	2	6	2	5	4	0	0	0	0	0	0	0
2	1	1	4	1	1	2	2	6	2	4	1	0	0	0	0	0	0	0
2	2	1	1	1	2	2	2	10	3	5	4	0	0	0	0	0	0	0
2	1	2	1	1	1	2	2	2	3	5	4	0	0	0	0	0	0	0
2	1	2	1	1	2	2	2	6	3	4	4	0	0	0	0	0	0	0
2	2	1	1	1	1	2	2	10	3	4	3	0	0	0	0	0	0	0
2	1	2	4	1	2	2	2	9	2	4	4	0	0	0	0	0	0	0
2	1	2	4	1	1	2	2	9	2	4	4	0	0	0	0	0	0	0
2	1	2	4	1	2	1	2	9	1	4	4	0	0	0	0	0	0	0
2	2	1	1	1	2	2	2	9	4	4	4	0	0	0	0	0	0	0
2	2	1	1	1	2	2	2	9	4	4	4	0	0	0	0	0	0	0
2	2	2	1	2	2	2	2	9	2	4	4	0	0	0	0	0	0	0
2	3	1	1	2	1	2	2	9	4	4	4	0	0	0	0	0	0	0
2	1	2	4	1	2	1	2	9	1	5	4	0	0	0	0	0	0	0
2	1	1	4	1	2	1	2	9	1	4	4	0	0	0	0	0	0	0
2	1	2	4	1	1	3	1	6	2	5	3	0	0	0	0	0	0	0
2	1	2	4	1	2	2	2	2	2	5	4	0	0	0	0	0	0	0
2	1	2	4	1	1	1	2	2	1	5	4	0	0	0	0	0	0	0
2	1	2	4	1	2	1	2	2	1	4	3	0	0	0	0	0	0	0
2	1	1	4	1	1	1	2	2	1	4	3	0	0	0	0	0	0	0
2	2	1	4	1	2	2	2	9	3	4	4	0	0	0	0	0	0	0
2	1	2	4	1	1	1	2	2	1	5	4	0	0	0	0	0	0	0
2	1	2	4	1	1	1	2	9	2	4	4	0	0	0	0	0	0	0
2	1	1	4	1	1	1	2	9	1	4	4	0	0	0	0	0	0	0
2	2	2	1	2	2	2	2	9	3	4	4	0	0	0	0	0	0	0
2	1	1	1	1	2	1	2	9	3	4	4	0	0	0	0	0	0	0
2	3	2	1	2	1	3	1	10	3	5	4	0	0	0	0	0	0	0
2	1	2	1	1	1	1	2	3	2	5	4	0	0	0	0	0	0	0
2	2	1	1	2	1	3	2	3	4	5	4	0	0	0	0	0	0	0
2	1	1	4	1	2	2	2	3	2	5	4	0	0	0	0	0	0	0
2	2	2	1	1	1	2	2	3	3	4	4	0	0	0	0	0	0	0
2	1	2	1	1	1	2	2	3	2	5	4	0	0	0	0	0	0	0
2	2	2	1	1	1	2	2	3	3	4	4	0	0	0	0	0	0	0
2	1	2	4	1	1	2	2	9	2	4	3	0	0	0	0	0	0	0
2	2	1	1	2	1	2	2	9	4	4	4	0	0	0	0	0	0	0
2	1	2	1	1	1	2	2	9	2	4	4	0	0	0	0	0	0	0
2	1	3	1	1	1	1	1	2	2	5	1	0	0	0	0	0	0	0
2	3	2	1	2	1	3	2	6	5	4	4	0	0	0	0	0	0	0
2	1	1	4	1	2	3	2	6	2	4	4	0	0	0	0	0	0	0
1	1	2	1	1	1	3	2	6	3	5	4	0	0	0	0	0	0	0
2	1	1	4	1	1	3	2	6	2	5	4	0	0	0	0	0	0	0
2	1	3	4	1	2	1	1	6	2	5	4	0	0	0	0	0	0	0
2	2	2	1	2	1	2	1	6	3	5	4	0	0	0	0	0	0	0
2	1	1	4	1	2	2	2	2	2	4	4	0	0	0	0	0	0	0
2	1	3	4	1	1	1	1	2	1	5	4	0	0	0	0	0	0	0
2	2	1	1	1	1	3	2	2	4	4	4	0	0	0	0	0	0	0
2	3	2	1	2	1	4	1	9	3	3	3	0	0	0	0	0	0	0
1	1	2	4	1	1	3	1	9	1	5	3	0	0	0	0	0	0	0
2	2	3	1	2	1	3	1	2	4	5	4	0	0	0	0	0	0	0
1	2	3	1	3	1	2	1	9	1	5	2	0	0	0	0	0	0	0
2	2	2	1	1	1	3	3	9	4	4	4	0	0	0	0	0	0	0
2	1	3	4	1	1	2	1	3	2	5	2	0	0	0	0	0	0	0
2	2	2	4	1	1	3	2	3	4	4	4	0	0	0	0	0	0	0
2	2	1	1	1	1	3	2	3	4	4	4	0	0	0	0	0	0	0
2	3	2	1	2	1	2	2	3	5	4	4	0	0	0	0	0	0	0
2	2	2	1	2	1	2	2	3	4	4	4	0	0	0	0	0	0	0
2	2	3	1	3	1	3	1	3	3	5	4	0	0	0	0	0	0	0
2	3	2	1	2	1	3	2	3	5	5	4	0	0	0	0	0	0	0
2	1	2	1	1	1	2	2	3	3	5	4	0	0	0	0	0	0	0
2	1	2	1	2	1	2	2	1	3	4	4	0	0	0	0	0	0	0
2	1	3	1	1	1	1	1	1	1	5	2	0	0	0	0	0	0	0
2	1	3	4	1	1	1	1	3	1	5	4	0	0	0	0	0	0	0
1	1	3	4	1	2	1	1	6	2	3	4	0	0	0	0	0	0	0
2	2	3	1	2	2	2	1	6	3	3	2	0	0	0	0	0	0	0
2	1	1	4	1	2	2	2	6	2	5	4	0	0	0	0	0	0	0
2	1	2	1	1	1	3	2	6	3	5	4	0	0	0	0	0	0	0
2	1	2	1	1	1	3	2	6	3	5	4	0	0	0	0	0	0	0
1	2	3	1	2	1	4	1	10	3	4	4	0	0	0	0	0	0	0
2	2	2	1	3	1	3	1	10	4	5	2	0	0	0	0	0	0	0
1	1	2	4	1	1	1	3	10	5	5	4	0	0	0	0	0	0	0
1	3	1	1	1	1	4	3	10	5	4	4	0	0	0	0	0	0	0
2	1	2	1	1	1	1	2	1	3	4	4	0	0	0	0	0	0	0
2	2	2	1	1	2	1	2	2	3	5	4	0	0	0	0	0	0	0
1	1	2	4	1	2	2	2	2	1	4	4	0	0	0	0	0	0	0
2	2	2	1	2	1	2	2	2	4	4	4	0	0	0	0	0	0	0
2	1	2	4	1	1	2	2	2	2	5	4	0	0	0	0	0	0	0
2	1	2	4	1	2	2	2	2	2	4	4	0	0	0	0	0	0	0
2	3	1	1	2	1	2	2	6	5	5	1	0	0	0	0	0	0	0
2	1	1	1	1	2	1	2	2	3	5	4	0	0	0	0	0	0	0
2	2	2	1	1	2	1	2	6	3	4	4	0	0	0	0	0	0	0
2	1	1	1	1	2	3	2	2	2	5	4	0	0	0	0	0	0	0
2	3	2	1	2	1	1	2	6	5	5	4	0	0	0	0	0	0	0
2	1	1	4	1	2	1	2	6	1	5	4	0	0	0	0	0	0	0
2	1	2	1	1	2	3	2	6	2	5	4	0	0	0	0	0	0	0
2	1	1	1	1	2	2	2	2	2	4	1	0	0	0	0	0	0	0
2	1	2	4	1	2	2	2	2	2	4	1	0	0	0	0	0	0	0
2	3	2	1	2	1	2	2	2	5	5	4	0	0	0	0	0	0	0
2	6	1	1	2	1	2	2	2	5	4	4	0	0	0	0	0	0	0
2	3	2	1	3	1	2	2	2	5	4	3	0	0	0	0	0	0	0
2	1	1	4	1	2	1	2	9	1	3	3	0	0	0	0	0	0	0
2	2	2	1	1	2	2	2	2	2	3	3	0	0	0	0	0	0	0
2	2	3	4	2	1	2	2	2	2	3	3	0	0	0	0	0	0	0
2	2	2	1	1	1	2	2	2	2	3	3	0	0	0	0	0	0	0
2	2	2	1	1	2	2	2	9	3	5	4	0	0	0	0	0	0	0
2	2	2	1	1	1	2	2	9	3	5	4	0	0	0	0	0	0	0
2	2	2	1	1	2	1	2	9	3	4	4	0	0	0	0	0	0	0
2	2	2	1	1	1	1	2	9	4	5	4	0	0	0	0	0	0	0
2	1	2	4	1	1	2	2	6	3	5	4	0	0	0	0	0	0	0
2	2	2	1	1	2	2	2	3	4	4	4	0	0	0	0	0	0	0
2	1	2	1	1	2	2	2	3	3	5	4	0	0	0	0	0	0	0
2	1	2	4	1	2	1	2	3	1	5	4	0	0	0	0	0	0	0
2	6	2	1	3	2	2	2	6	3	4	4	0	0	0	0	0	0	0
2	1	2	1	1	2	2	2	6	2	5	4	0	0	0	0	0	0	0
2	1	1	4	1	2	2	2	6	2	5	4	0	0	0	0	0	0	0
2	3	1	1	2	1	2	2	6	5	5	4	0	0	0	0	0	0	0
2	1	1	1	1	2	2	2	6	3	5	4	0	0	0	0	0	0	0
2	1	2	1	1	2	1	2	6	3	5	4	0	0	0	0	0	0	0
2	1	2	1	1	1	2	2	6	3	5	4	0	0	0	0	0	0	0
2	1	2	1	1	1	2	2	10	2	5	1	0	0	0	0	0	0	0
2	2	2	1	1	1	2	2	1	3	4	3	0	0	0	0	0	0	0
2	1	2	4	2	2	1	2	2	2	4	4	0	0	0	0	0	0	0
1	3	2	1	3	1	3	1	2	4	4	1	0	0	0	0	0	0	0
2	2	3	1	2	1	2	1	2	4	5	4	0	0	0	0	0	0	0
2	1	2	4	1	2	2	2	3	2	4	4	0	0	0	0	0	0	0
2	1	3	4	1	2	1	1	2	1	4	4	0	0	0	0	0	0	0
1	2	2	1	2	2	2	1	2	3	5	4	0	0	0	0	0	0	0
2	3	3	1	3	1	3	1	3	3	3	2	0	0	0	0	0	0	0
1	1	3	4	1	1	2	1	3	1	4	4	0	0	0	0	0	0	0
2	1	2	1	1	1	2	1	1	2	3	3	0	0	0	0	0	0	0
2	1	3	4	1	1	2	1	2	2	3	3	0	0	0	0	0	0	0
2	1	2	4	1	2	2	1	2	2	3	3	0	0	0	0	0	0	0
2	1	3	4	1	1	2	1	3	2	4	4	0	0	0	0	0	0	0
2	1	2	4	1	1	2	3	10	1	5	4	0	0	0	0	0	0	0
1	1	3	1	1	1	2	1	2	2	3	3	0	0	0	0	0	0	0
1	1	3	4	1	1	2	1	3	1	3	3	0	0	0	0	0	0	0
1	1	3	1	1	1	3	1	3	1	3	3	0	0	0	0	0	0	0
1	1	3	1	1	1	2	1	3	2	5	4	0	0	0	0	0	0	0
1	2	3	1	1	1	3	1	2	2	5	4	0	0	0	0	0	0	0
1	1	2	1	2	1	3	1	3	2	5	4	0	0	0	0	0	0	0
2	2	3	1	1	1	2	1	2	2	3	3	0	0	0	0	0	0	0
2	2	2	4	1	2	2	3	10	2	4	4	0	0	0	0	0	0	0
1	2	2	1	2	1	3	3	10	2	3	3	0	0	0	0	0	0	0
2	1	1	4	1	2	2	1	9	1	3	1	0	0	0	0	0	0	0
1	3	3	1	2	1	3	1	3	2	5	4	0	0	0	0	0	0	0
2	1	2	4	1	2	2	2	9	1	3	3	0	0	0	0	0	0	0
1	1	2	1	1	2	2	3	4	2	3	3	0	0	0	0	0	0	0
1	1	2	4	1	2	2	1	3	1	3	3	0	0	0	0	0	0	0
1	3	3	1	2	1	3	1	3	3	5	4	0	0	0	0	0	0	0
2	1	2	4	1	2	2	1	1	2	3	4	0	0	0	0	0	0	0
2	1	2	4	1	2	2	1	2	2	3	3	0	0	0	0	0	0	0
2	2	3	1	2	1	3	1	2	2	5	4	0	0	0	0	0	0	0
1	3	2	1	2	1	3	3	10	3	3	3	0	0	0	0	0	0	0
1	1	2	1	1	2	2	1	3	2	3	3	0	0	0	0	0	0	0
2	1	3	4	1	2	1	1	2	2	5	4	0	0	0	0	0	0	0
2	6	2	1	3	1	2	1	2	5	5	2	0	0	0	0	0	0	0
1	2	3	4	1	1	2	1	3	1	3	3	0	0	0	0	0	0	0
2	1	3	4	1	1	2	1	2	1	4	4	0	0	0	0	0	0	0
2	1	2	4	1	1	2	3	10	1	4	4	0	0	0	0	0	0	0
2	1	3	4	1	1	2	1	2	1	4	4	0	0	0	0	0	0	0
2	1	3	4	1	1	2	1	2	1	3	3	0	0	0	0	0	0	0
2	1	3	4	1	1	2	1	2	1	4	4	0	0	0	0	0	0	0
2	1	3	4	1	1	2	1	2	2	3	3	0	0	0	0	0	0	0
1	1	2	1	1	2	2	3	10	1	4	4	0	0	0	0	0	0	0
1	1	1	4	1	1	2	1	3	1	3	3	0	0	0	0	0	0	0
1	1	2	4	1	1	2	1	1	1	4	4	0	0	0	0	0	0	0
1	1	2	4	1	1	2	1	3	1	4	3	0	0	0	0	0	0	0
1	1	3	1	1	1	2	1	2	1	4	4	0	0	0	0	0	0	0
1	1	3	4	1	1	2	1	3	2	3	3	0	0	0	0	0	0	0
2	2	2	1	2	1	3	1	3	2	4	4	0	0	0	0	0	0	0
2	1	2	4	1	1	2	1	10	1	4	4	0	0	0	0	0	0	0
2	1	3	4	1	1	2	1	3	1	3	3	0	0	0	0	0	0	0
1	1	3	4	1	1	2	1	3	2	4	4	0	0	0	0	0	0	0
2	1	2	4	1	1	2	1	6	3	5	4	0	0	0	0	0	0	0
2	1	2	4	1	2	1	1	6	1	3	1	0	0	0	0	0	0	0
2	1	3	1	1	1	1	1	6	2	5	4	0	0	0	0	0	0	0
2	1	2	4	1	2	1	1	6	1	4	4	0	0	0	0	0	0	0
2	1	2	1	1	2	2	1	6	2	5	4	0	0	0	0	0	0	0
2	1	2	1	1	2	1	1	2	1	5	4	0	0	0	0	0	0	0
1	2	2	1	2	1	2	1	2	3	5	4	0	0	0	0	0	0	0
2	1	3	4	1	1	1	1	2	1	5	4	0	0	0	0	0	0	0
2	2	3	1	2	1	3	1	2	3	5	4	0	0	0	0	0	0	0
2	1	2	1	1	1	1	1	2	2	5	3	0	0	0	0	0	0	0
2	2	2	1	1	1	2	1	2	3	5	3	0	0	0	0	0	0	0
2	2	1	1	1	2	2	2	2	4	5	4	0	0	0	0	0	0	0
2	2	1	1	1	2	2	2	2	2	5	4	0	0	0	0	0	0	0
1	2	3	1	2	1	3	1	3	4	4	4	0	0	0	0	0	0	0
2	1	2	1	1	1	1	1	3	1	5	4	0	0	0	0	0	0	0
1	1	2	1	1	2	1	1	3	1	5	4	0	0	0	0	0	0	0
1	3	2	1	2	1	3	1	3	4	3	4	0	0	0	0	0	0	0
1	3	2	4	3	1	3	1	3	4	3	2	0	0	0	0	0	0	0
1	1	2	4	1	1	2	1	3	4	5	2	0	0	0	0	0	0	0
1	1	3	4	1	1	1	1	3	1	5	2	0	0	0	0	0	0	0
1	6	2	4	3	1	3	1	3	5	3	2	0	0	0	0	0	0	0
1	6	2	1	3	1	3	1	3	5	3	2	0	0	0	0	0	0	0
2	2	1	4	1	2	2	2	3	3	4	4	0	0	0	0	0	0	0
2	1	1	1	1	2	1	2	3	1	4	4	0	0	0	0	0	0	0
2	1	1	4	1	2	1	2	3	2	4	4	0	0	0	0	0	0	0
2	1	2	4	1	2	1	2	3	1	4	3	0	0	0	0	0	0	0
2	3	2	1	3	1	2	2	3	5	4	4	0	0	0	0	0	0	0
2	1	2	4	1	2	1	2	3	1	5	4	0	0	0	0	0	0	0
2	1	1	1	1	2	2	2	3	2	5	4	0	0	0	0	0	0	0
2	3	1	1	2	2	2	2	3	5	4	4	0	0	0	0	0	0	0
2	1	2	4	1	2	2	2	3	2	5	4	0	0	0	0	0	0	0
2	2	1	1	1	2	2	2	3	3	4	2	0	0	0	0	0	0	0
2	1	1	4	1	2	2	2	3	2	4	4	0	0	0	0	0	0	0
2	1	1	4	1	2	2	2	3	3	4	4	0	0	0	0	0	0	0
2	2	1	1	1	2	2	2	3	3	4	4	0	0	0	0	0	0	0
2	2	1	1	1	2	2	2	3	5	4	4	0	0	0	0	0	0	0
2	2	2	1	2	1	2	2	3	3	4	4	0	0	0	0	0	0	0
2	1	1	4	1	2	2	2	3	2	4	4	0	0	0	0	0	0	0
1	2	2	4	1	1	3	1	1	3	5	4	0	0	0	0	0	0	0
1	2	2	4	1	2	2	1	1	2	5	4	0	0	0	0	0	0	0
2	3	3	4	2	1	4	1	1	4	5	4	0	0	0	0	0	0	0
2	2	1	1	1	2	2	2	1	3	5	4	0	0	0	0	0	0	0
2	2	1	1	3	1	3	2	1	4	5	3	0	0	0	0	0	0	0
2	1	1	1	3	1	3	2	1	5	5	2	0	0	0	0	0	0	0
2	2	1	1	1	1	2	2	1	3	5	3	0	0	0	0	0	0	0
2	1	1	4	2	2	2	2	6	3	3	1	0	0	0	0	0	0	0
2	1	1	4	1	2	2	2	6	3	5	4	0	0	0	0	0	0	0
2	1	1	1	1	2	1	2	6	2	5	4	0	0	0	0	0	0	0
2	2	2	1	1	2	2	2	6	3	5	1	0	0	0	0	0	0	0
2	1	2	1	1	2	2	2	6	3	5	4	0	0	0	0	0	0	0
2	1	1	4	1	2	3	2	6	2	5	4	0	0	0	0	0	0	0
2	2	2	4	1	1	2	2	6	3	5	4	0	0	0	0	0	0	0
1	2	2	1	1	1	2	1	9	3	4	3	0	0	0	0	0	0	0
2	2	1	1	1	2	2	3	9	3	4	4	0	0	0	0	0	0	0
1	2	2	1	1	1	3	1	9	4	5	4	0	0	0	0	0	0	0
2	2	3	1	3	1	3	1	9	3	4	4	0	0	0	0	0	0	0
2	2	3	1	2	1	3	1	9	3	4	4	0	0	0	0	0	0	0
2	3	2	4	3	1	3	1	9	5	4	4	0	0	0	0	0	0	0
2	3	2	1	3	1	3	1	9	5	5	4	0	0	0	0	0	0	0
2	3	2	4	3	1	3	1	9	5	4	4	0	0	0	0	0	0	0
2	1	1	1	1	2	2	3	10	3	4	4	0	0	0	0	0	0	0
1	1	1	1	1	2	2	3	10	3	4	4	0	0	0	0	0	0	0
2	3	2	1	3	1	3	1	10	5	5	3	0	0	0	0	0	0	0
2	1	3	4	1	2	1	1	1	5	5	3	0	0	0	0	0	0	0
2	1	2	4	1	1	1	1	2	2	5	4	0	0	0	0	0	0	0
2	1	1	4	1	1	2	2	6	2	4	4	0	0	0	0	0	0	0
2	1	1	4	1	2	2	2	6	2	4	1	0	0	0	0	0	0	0
2	1	2	4	1	1	1	2	6	2	4	4	0	0	0	0	0	0	0
2	2	2	1	1	1	2	2	6	4	4	4	0	0	0	0	0	0	0
2	1	2	1	1	1	3	2	6	3	4	1	0	0	0	0	0	0	0
2	1	1	4	1	2	1	2	1	1	4	4	0	0	0	0	0	0	0
2	2	2	1	1	1	2	2	1	3	4	4	0	0	0	0	0	0	0
2	2	2	1	2	1	2	2	3	3	4	4	0	0	0	0	0	0	0
2	1	2	4	1	1	1	2	1	1	5	4	0	0	0	0	0	0	0
2	1	2	4	1	1	1	2	1	1	3	1	0	0	0	0	0	0	0
2	1	2	1	1	1	2	2	9	3	5	3	0	0	0	0	0	0	0
2	2	2	1	1	1	2	2	2	4	4	4	0	0	0	0	0	0	0
2	1	2	4	1	1	2	2	2	1	4	4	0	0	0	0	0	0	0
2	1	2	4	1	1	2	2	2	2	4	4	0	0	0	0	0	0	0
2	2	2	1	2	1	2	1	9	3	4	3	0	0	0	0	0	0	0
2	2	3	1	2	1	3	1	9	2	4	4	0	0	0	0	0	0	0
2	3	3	1	3	1	3	1	3	4	4	4	0	0	0	0	0	0	0
1	1	3	1	1	1	2	1	3	3	4	4	0	0	0	0	0	0	0
1	2	3	4	2	1	2	1	3	3	4	3	0	0	0	0	0	0	0
1	6	3	1	3	1	4	1	6	5	5	4	0	0	0	0	0	0	0
2	1	3	4	1	1	3	1	2	2	5	4	0	0	0	0	0	0	0
2	1	2	4	1	2	2	1	2	2	5	2	0	0	0	0	0	0	0
1	2	2	1	1	1	1	1	2	3	4	4	0	0	0	0	0	0	0
2	3	2	1	3	1	2	2	2	5	5	3	0	0	0	0	0	0	0
2	1	2	4	1	1	1	1	2	1	5	2	0	0	0	0	0	0	0
2	1	3	4	1	1	2	1	2	1	4	2	0	0	0	0	0	0	0
2	2	2	1	2	1	2	2	3	4	5	4	0	0	0	0	0	0	0
2	2	2	1	1	1	2	2	3	3	4	4	0	0	0	0	0	0	0
2	1	2	1	1	1	2	2	3	3	4	4	0	0	0	0	0	0	0
2	1	2	1	1	1	2	2	3	3	4	3	0	0	0	0	0	0	0
2	1	2	4	1	1	1	2	3	1	5	3	0	0	0	0	0	0	0
2	1	1	4	1	2	1	2	3	2	5	4	0	0	0	0	0	0	0
2	2	2	1	1	1	3	2	3	3	4	4	0	0	0	0	0	0	0
2	1	2	1	1	1	2	2	3	3	4	3	0	0	0	0	0	0	0
2	1	1	4	1	2	2	2	1	2	4	4	0	0	0	0	0	0	0
2	1	1	1	1	2	1	2	3	1	4	4	0	0	0	0	0	0	0
2	1	1	4	2	2	1	2	3	1	4	4	0	0	0	0	0	0	0
2	1	1	4	1	2	1	2	2	2	4	4	0	0	0	0	0	0	0
2	1	2	4	1	1	2	2	2	2	4	4	0	0	0	0	0	0	0
2	1	1	4	1	1	1	2	2	1	3	3	0	0	0	0	0	0	0
2	1	2	4	1	1	1	2	2	1	5	2	0	0	0	0	0	0	0
2	1	1	4	1	2	1	2	2	1	5	2	0	0	0	0	0	0	0
2	1	1	4	1	2	1	2	2	1	5	4	0	0	0	0	0	0	0
2	1	1	4	1	2	2	2	2	2	5	4	0	0	0	0	0	0	0
2	1	1	4	1	2	2	2	2	2	5	4	0	0	0	0	0	0	0
2	1	2	4	1	1	2	2	2	2	5	4	0	0	0	0	0	0	0
2	1	2	4	2	1	2	2	2	2	5	3	0	0	0	0	0	0	0
2	1	1	4	1	1	1	2	2	1	4	4	0	0	0	0	0	0	0
2	2	2	1	3	1	3	2	2	4	4	3	0	0	0	0	0	0	0
2	2	2	1	2	1	3	2	2	3	4	3	0	0	0	0	0	0	0
2	2	2	1	3	1	3	2	2	4	4	3	0	0	0	0	0	0	0
2	1	2	1	2	1	2	2	2	2	4	4	0	0	0	0	0	0	0
2	2	2	4	2	1	2	2	2	3	4	4	0	0	0	0	0	0	0
2	1	2	4	1	1	2	2	2	2	5	4	0	0	0	0	0	0	0
2	1	2	1	1	1	2	2	1	2	5	4	0	0	0	0	0	0	0
2	1	2	4	1	1	1	2	1	1	4	4	0	0	0	0	0	0	0
2	1	1	4	1	2	1	2	1	1	5	4	0	0	0	0	0	0	0
1	1	2	1	1	1	3	3	10	2	5	1	0	0	0	0	0	0	0
2	3	2	1	3	1	3	3	10	5	4	2	0	0	0	0	0	0	0
1	2	2	1	2	1	3	1	10	4	5	1	0	0	0	0	0	0	0
2	1	1	4	1	2	1	2	9	2	4	4	0	0	0	0	0	0	0
2	1	3	4	1	2	2	1	9	2	4	4	0	0	0	0	0	0	0
2	1	2	1	1	1	2	2	3	3	5	4	0	0	0	0	0	0	0
2	1	2	4	1	1	1	2	3	2	5	4	0	0	0	0	0	0	0
2	1	2	4	1	2	2	2	3	3	5	4	0	0	0	0	0	0	0
2	1	2	4	1	1	2	2	3	2	5	3	0	0	0	0	0	0	0
2	3	2	1	3	1	3	2	3	5	4	4	0	0	0	0	0	0	0
2	1	2	1	2	1	1	2	3	3	5	4	0	0	0	0	0	0	0
1	2	3	4	1	1	2	1	3	3	4	4	0	0	0	0	0	0	0
1	1	3	4	1	1	2	1	3	2	4	4	0	0	0	0	0	0	0
2	2	2	1	2	1	2	1	3	4	5	3	0	0	0	0	0	0	0
2	1	3	4	1	1	1	1	9	2	5	3	0	0	0	0	0	0	0
2	1	1	4	1	2	2	2	3	1	4	4	0	0	0	0	0	0	0
2	1	1	4	1	2	2	2	3	1	4	3	0	0	0	0	0	0	0
1	2	2	1	2	2	3	1	3	3	5	4	0	0	0	0	0	0	0
1	2	3	1	1	1	1	1	3	2	5	2	0	0	0	0	0	0	0
2	1	2	4	1	2	1	2	2	1	5	3	0	0	0	0	0	0	0
2	1	2	4	1	2	1	2	2	1	5	3	0	0	0	0	0	0	0
2	1	2	4	1	2	1	2	4	1	4	4	0	0	0	0	0	0	0
2	2	2	4	1	1	2	1	4	3	4	4	0	0	0	0	0	0	0
2	1	2	1	1	1	2	2	2	2	5	2	0	0	0	0	0	0	0
2	1	1	1	1	2	1	2	2	2	5	4	0	0	0	0	0	0	0
2	1	2	1	1	1	2	2	2	3	4	4	0	0	0	0	0	0	0
2	1	2	4	1	1	1	2	2	3	4	4	0	0	0	0	0	0	0
2	1	2	4	1	1	1	2	2	3	4	4	0	0	0	0	0	0	0
2	1	2	1	1	2	1	2	3	2	5	4	0	0	0	0	0	0	0
2	1	2	1	1	2	1	2	3	3	4	4	0	0	0	0	0	0	0
2	1	2	1	1	2	1	2	3	3	4	4	0	0	0	0	0	0	0
1	1	2	4	2	2	2	2	9	2	5	4	0	0	0	0	0	0	0
1	1	2	1	1	2	1	2	3	3	5	4	0	0	0	0	0	0	0
2	1	1	4	1	2	1	2	9	1	5	2	0	0	0	0	0	0	0
2	1	1	4	1	2	1	2	2	2	5	4	0	0	0	0	0	0	0
1	1	1	1	1	2	2	2	3	3	5	4	0	0	0	0	0	0	0
2	1	2	4	1	2	2	2	3	2	5	4	0	0	0	0	0	0	0
2	1	2	4	1	1	1	2	3	2	5	4	0	0	0	0	0	0	0
2	1	2	1	1	1	2	2	3	2	4	1	0	0	0	0	0	0	0
2	2	2	1	1	1	2	2	3	3	5	4	0	0	0	0	0	0	0
2	1	1	4	1	2	1	2	3	2	5	4	0	0	0	0	0	0	0
2	1	2	4	1	1	2	2	3	2	5	4	0	0	0	0	0	0	0
2	2	2	4	2	1	2	2	2	4	5	3	0	0	0	0	0	0	0
2	2	2	1	1	1	1	2	1	4	4	4	0	0	0	0	0	0	0
2	1	2	4	1	2	2	2	6	2	5	4	0	0	0	0	0	0	0
2	2	2	1	1	1	1	2	6	3	5	1	0	0	0	0	0	0	0
2	2	2	1	2	1	2	2	6	3	5	1	0	0	0	0	0	0	0
2	1	2	4	1	2	2	2	6	2	3	1	0	0	0	0	0	0	0
2	2	2	1	1	1	2	2	6	3	4	4	0	0	0	0	0	0	0
2	3	2	1	2	1	2	2	2	5	5	4	0	0	0	0	0	0	0
2	1	2	4	1	1	2	2	2	3	5	4	0	0	0	0	0	0	0
2	2	2	1	2	1	2	2	2	4	5	4	0	0	0	0	0	0	0
1	1	2	1	1	1	2	3	10	2	5	4	0	0	0	0	0	0	0
1	1	2	4	1	2	3	1	4	2	5	2	0	0	0	0	0	0	0
1	1	2	4	1	2	3	1	4	2	4	1	0	0	0	0	0	0	0
2	2	2	1	1	2	2	2	2	4	4	2	0	0	0	0	0	0	0
2	1	1	4	1	2	2	2	2	2	4	3	0	0	0	0	0	0	0
2	1	2	4	1	2	1	2	2	1	4	3	0	0	0	0	0	0	0
2	2	2	1	2	2	2	2	2	3	5	4	0	0	0	0	0	0	0
2	1	2	4	1	2	1	2	2	2	5	4	0	0	0	0	0	0	0
2	1	2	4	1	2	1	2	2	2	5	4	0	0	0	0	0	0	0
2	3	1	1	3	1	2	2	2	5	4	1	0	0	0	0	0	0	0
1	3	3	1	3	1	3	3	10	5	5	1	0	0	0	0	0	0	0
2	2	2	1	3	1	2	2	2	5	4	1	0	0	0	0	0	0	0
2	2	2	1	3	1	3	2	3	5	4	4	0	0	0	0	0	0	0
2	2	2	1	3	1	3	2	6	5	4	3	0	0	0	0	0	0	0
2	3	2	1	3	1	3	1	2	5	5	4	0	0	0	0	0	0	0
2	3	2	1	3	1	2	2	6	5	4	2	0	0	0	0	0	0	0
2	3	2	1	3	1	2	2	3	5	5	2	0	0	0	0	0	0	0
2	3	2	1	3	1	2	2	3	5	5	4	0	0	0	0	0	0	0
2	1	3	4	1	1	2	1	1	2	5	3	0	0	0	0	0	0	0
2	2	2	1	2	2	2	2	9	4	4	4	0	0	0	0	0	0	0
2	3	2	1	2	1	3	2	10	5	5	4	0	0	0	0	0	0	0
1	6	2	1	3	1	3	3	3	5	5	4	0	0	0	0	0	0	0
2	1	2	1	1	2	2	2	9	3	5	4	0	0	0	0	0	0	0
1	1	2	4	1	1	2	1	9	2	4	4	0	0	0	0	0	0	0
2	1	1	1	2	2	2	2	2	3	4	4	0	0	0	0	0	0	0
2	6	1	1	1	1	2	2	2	5	5	4	0	0	0	0	0	0	0
2	1	3	1	1	1	2	1	2	2	4	4	0	0	0	0	0	0	0
2	1	3	1	1	1	2	1	9	1	5	4	0	0	0	0	0	0	0
2	2	3	1	1	1	2	1	9	3	5	3	0	0	0	0	0	0	0
2	2	1	4	1	1	2	2	9	3	5	4	0	0	0	0	0	0	0
2	1	2	4	1	1	2	2	9	2	5	2	0	0	0	0	0	0	0
2	1	1	4	2	1	1	2	9	1	3	3	0	0	0	0	0	0	0
2	1	1	4	1	1	1	2	1	2	5	4	0	0	0	0	0	0	0
2	1	3	4	1	1	3	1	1	1	5	4	0	0	0	0	0	0	0
2	1	2	1	1	1	2	2	1	3	5	4	0	0	0	0	0	0	0
2	1	1	1	1	1	2	2	1	2	5	4	0	0	0	0	0	0	0
2	2	2	4	1	1	2	2	1	3	5	4	0	0	0	0	0	0	0
2	2	2	4	1	1	2	2	1	3	5	4	0	0	0	0	0	0	0
2	2	3	1	2	1	2	1	9	3	5	4	0	0	0	0	0	0	0
2	3	3	4	3	1	3	1	9	4	5	4	0	0	0	0	0	0	0
2	2	2	1	3	1	2	2	6	3	5	4	0	0	0	0	0	0	0
2	1	1	4	1	1	1	2	6	2	5	4	0	0	0	0	0	0	0
2	2	2	1	3	1	2	2	6	4	5	1	0	0	0	0	0	0	0
2	1	1	4	1	1	1	2	6	1	5	4	0	0	0	0	0	0	0
2	1	2	1	1	1	2	2	6	3	4	4	0	0	0	0	0	0	0
2	1	2	4	1	2	2	2	6	2	4	4	0	0	0	0	0	0	0
2	3	1	1	2	1	2	2	9	5	5	4	0	0	0	0	0	0	0
2	1	1	4	1	2	1	2	9	1	4	4	0	0	0	0	0	0	0
2	1	2	1	1	2	2	2	3	2	5	4	0	0	0	0	0	0	0
1	2	2	1	3	1	3	1	3	4	5	3	0	0	0	0	0	0	0
2	1	3	4	1	1	2	2	4	1	4	1	0	0	0	0	0	0	0
2	3	1	1	2	1	3	2	10	5	4	3	0	0	0	0	0	0	0
1	2	3	1	2	1	2	1	9	3	4	4	0	0	0	0	0	0	0
1	3	3	1	2	1	3	1	9	3	4	4	0	0	0	0	0	0	0
2	2	3	1	2	1	3	1	9	3	5	4	0	0	0	0	0	0	0
2	1	2	4	1	2	1	2	3	2	5	3	0	0	0	0	0	0	0
2	1	2	1	2	2	2	2	3	3	5	4	0	0	0	0	0	0	0
2	1	3	4	1	1	2	1	3	1	5	4	0	0	0	0	0	0	0
1	2	3	1	1	1	3	1	3	2	3	3	0	0	0	0	0	0	0
2	1	2	1	1	2	2	2	3	3	5	4	0	0	0	0	0	0	0
2	1	2	1	1	2	1	2	3	3	4	3	0	0	0	0	0	0	0
1	2	2	1	2	1	2	1	3	5	5	4	0	0	0	0	0	0	0
1	1	3	4	1	1	1	1	3	1	5	4	0	0	0	0	0	0	0
1	3	2	1	3	1	4	1	2	5	4	2	0	0	0	0	0	0	0
2	6	3	1	3	1	4	1	2	5	4	1	0	0	0	0	0	0	0
1	3	2	1	2	1	3	1	10	4	4	2	0	0	0	0	0	0	0
2	1	2	1	1	2	2	2	3	2	5	3	0	0	0	0	0	0	0
1	1	3	4	1	1	1	1	3	1	5	4	0	0	0	0	0	0	0
1	1	3	1	1	1	2	1	3	2	5	4	0	0	0	0	0	0	0
2	1	3	4	1	1	1	1	3	1	3	2	0	0	0	0	0	0	0
2	1	2	4	1	2	1	1	2	2	4	4	0	0	0	0	0	0	0
2	1	3	1	1	1	1	1	2	2	5	4	0	0	0	0	0	0	0
1	1	3	4	1	1	1	1	3	5	4	4	0	0	0	0	0	0	0
2	3	1	1	2	1	2	2	3	5	5	4	0	0	0	0	0	0	0
2	1	3	4	1	2	1	1	2	1	5	4	0	0	0	0	0	0	0
2	1	3	4	1	1	1	1	2	1	5	4	0	0	0	0	0	0	0
2	3	2	1	2	1	4	2	3	5	4	4	0	0	0	0	0	0	0
2	1	2	4	1	1	3	2	1	3	5	4	0	0	0	0	0	0	0
2	1	2	4	1	2	1	2	2	1	5	4	0	0	0	0	0	0	0
2	3	2	1	3	1	3	1	6	5	5	1	0	0	0	0	0	0	0
2	2	3	1	2	1	2	1	6	3	5	4	0	0	0	0	0	0	0
2	1	2	4	1	2	1	2	6	2	5	4	0	0	0	0	0	0	0
2	1	2	4	1	2	1	1	6	1	5	4	0	0	0	0	0	0	0
2	1	2	4	1	1	1	2	6	1	4	4	0	0	0	0	0	0	0
2	2	2	4	1	1	2	2	9	4	3	1	0	0	0	0	0	0	0
2	3	1	1	2	1	2	2	6	5	5	4	0	0	0	0	0	0	0
2	6	1	1	2	1	2	2	6	5	5	4	0	0	0	0	0	0	0
2	2	2	1	1	1	2	2	6	3	5	4	0	0	0	0	0	0	0
2	1	3	4	1	2	2	1	6	1	5	4	0	0	0	0	0	0	0
2	1	3	4	1	2	2	1	6	1	5	4	0	0	0	0	0	0	0
2	1	1	4	1	1	2	2	6	3	5	4	0	0	0	0	0	0	0
2	2	2	1	2	1	2	2	6	4	5	4	0	0	0	0	0	0	0
2	1	2	1	1	1	2	2	1	3	4	1	0	0	0	0	0	0	0
2	2	2	1	1	1	2	2	1	3	5	4	0	0	0	0	0	0	0
1	1	3	4	1	1	1	1	3	1	5	4	0	0	0	0	0	0	0
2	1	1	4	1	1	1	2	3	1	5	4	0	0	0	0	0	0	0
2	3	2	1	3	1	4	1	10	5	4	1	0	0	0	0	0	0	0
1	6	2	1	3	1	4	1	10	5	5	1	0	0	0	0	0	0	0
2	3	1	1	2	1	2	2	10	5	4	4	0	0	0	0	0	0	0
2	3	2	1	2	1	2	2	10	5	5	4	0	0	0	0	0	0	0
2	2	2	1	1	1	2	2	1	3	5	4	0	0	0	0	0	0	0
2	2	2	1	1	1	2	2	1	4	5	4	0	0	0	0	0	0	0
2	2	2	1	3	1	3	1	1	4	4	4	0	0	0	0	0	0	0
[truncated: 36 more columns]
